# Supplementary material for: Integrated Systems-Level Proteomics and Metabolomics Reveals the Diel Molecular Landscape of Diverse Kale Cultivars
Source: bioRxiv preprint, doi:10.1101/2022.04.09.487754, version 2 (2023-02-25)
Supplement: Supplemental Data 5 [file 487754_file14.xlsx]

## Sheet: Readme
Raw	Results for all the cultivars directly uploaded from MultisynQ server after acquisition

## Sheet: Raw
ID	Series	Repeat	Sample Number	Variety Number	air_temp_kinetics	Ambient Humidity	Ambient Pressure	Ambient Temperature	data_raw_PAM	ECS_averaged_trace	ECS_tau	ECSt mAU	fitinput	FmPrime	FoPrime	Fs	FvP_over_FmP	gH+	humidity2_K	humidity_K	kP700	leaf angle	Leaf Temperature	Leaf Temperature Differenial	Leaf Temperature Differential	LEAF_temp	leaf_thickness	LEF	LEFd_trace	Light Intensity (PAR)	NPQt	outdata	P700_DIRK_ampl	P700_DIRK_averaged_trace	P700_fitinput	P700_outdata	Phi2	PhiNO	PhiNPQ	Phi2+PhiNO+PhiNPQ	PS1 Active Centers	PS1 Open Centers	PS1 Over Reduced Centers	PS1 Oxidized Centers	PSI_data_absorbance	pump	qL	SPAD	test_data_raw_PAM
2559579	10	1	9	10	32.38,32.37,32.35	13.1143	940.076	32.35	1328,1334,1333,1326,1326,1338,1333,1333,1328,1334,1334,1332,1330,1334,1328,1330,1334,1327,1332,1334,1331,1328,1332,1330,1337,1331,1327,1332,1334,1330,1332,1329,1332,1328,1328,1335,1333,1330,1334,1332,1325,1329,1333,1326,1328,1333,1329,1332,1326,1328,1334,1334,1326,1329,1334,1333,1326,1326,1334,1334,1333,1326,1330,1330,1329,1329,1334,1331,1329,1338,1333,1328,1332,1334,1326,1327,1331,1328,1333,1334…	0.00002060198974308952,-0.00008716507787310222,-0.00005088037833409214,0.000010617542273781346,0.00009373639634157546,0.00003997849382873506,-0.00003177819278604699,0.00007294240852414014,0.00012004417967279595,0.00005187725772546221,0.00003414204205638179,0.00008484068669354535,0.000027485803620303178,0.00008178473240569579,0.00009286355564025651,0.0001507715215096147,0.00001777562476350063,0.00…	0.008	0.00041	0.0002241852358065009,0.00011638506461952969,0.00009144505339883741,-0.0000055165774408073335,-0.000030448057263225426,-0.000012170728596300643,-0.000022699011423296154,-0.0000980313400598422,-0.00009055690784817812,-0.00014787837483283886,-0.00016200115149444657,-0.00018332156745543856,-0.0001830463997148303,-0.00013958005980918898,-0.00012850688356780238,-0.0001894189174931807,-0.00022153293105…	4636.22	1016	1331	0.781	125.412	21.30273,21.84766,22.20996	12.75977,12.90625,13.11426	512.181	32.78	20.25	-12.1	-12.1	20.25,21.61,22.67	0.32	25.49	1504,1498,1502,1503,1500,1502,1503,1505,1507,1509,1512,1510,1512,1514,1515,1514,1508,1502,1503,1454,1452,1440,1431,1431,1427,1425,1423,1420,1410,1408,1406,1405,1398,1404,1398,1396,1394,1397,1395,1404,1434,1449,1457,1465,1475,1477,1483,1478,1476,1488,1492,1490,1484,1489,1488,1486,1492,1489,1491,1493,1494,1492,1494,1492,1497,1500,1504,1502,1497,1504,1498,1499,1498,1500,1498,1504,1504,1509,1508,1502…	79.452	0.37	0.00020801081663109752,0.00015941137480351056,0.0001165401948462591,0.00007872210472400275,0.00004536151278505392,0.00001593302787428148,-0.00001002681497648219,-0.00003292685359143835,-0.00005312773737880139,-0.00007094760714635844,-0.0000866671054552067,-0.00010053379641900717,-0.00011276606455553606,-0.000123556554092986,-0.00013307520289615525,-0.00014147191879339234,-0.0001488789404533824,-0…	0.00013	0.00002428542981718557,-0.00002440039626986564,0.000057879435431689775,0.000005956374715995489,0.00004943181337684357,0.0000152952057784305,-0.000028538737306866006,0.000027867890033299224,0.000019602341998265678,0.000032356196903743635,0.00003055810683297415,0.000012591578132291975,-0.00001669114540972983,0.00001384613738096339,-0.000012203078610474456,0.00006684148284449998,0.000032704690598578…	0.00009273629040135655,0.00003914502584773472,0.000007033811066718119,-0.000012206826811510351,-0.000023735576143658775,-0.00003064345840851385,-0.000034782574977909014,-0.000037262681806336714,-0.00003874873076806299,-0.000039639152701237435,-0.000040172682375897074,-0.00004049236667739176,-0.00004068391750853783,-0.00004079869236842678,-0.000040867464027540513,-0.00004090867114468995,-0.0000409…	0.00020801081663109752,0.00015941137480351056,0.0001165401948462591,0.00007872210472400275,0.00004536151278505392,0.00001593302787428148,-0.00001002681497648219,-0.00003292685359143835,-0.00005312773737880139,-0.00007094760714635844,-0.0000866671054552067,-0.00010053379641900717,-0.00011276606455553606,-0.000123556554092986,-0.00013307520289615525,-0.00014147191879339234,-0.0001488789404533824,-0…	0.713	0.21	0.077	1	-0.203	-0.206	3.148	-1.942	0.00048100421856619324,0.00046356722493150703,0.000515880306270378,0.00034152786830169346,0.0003240964736535238,0.0006728573692509089,0.00040254325989268934,0.0003066657786259049,0.00035895996262652114,0.00046356722493150703,0.0004112604442227817,0.00037639275668419027,0.0002718064872074988,0.0004374130470932589,0.0002020962973462223,0.0005333194004523798,0.0002718064872074988,0.00033281208352155…	none	0.697	44.774	620
2559578	10	1	8	10	32.53,32.53,32.54	15.9082	940.122	32.54	1705,1716,1712,1708,1714,1709,1718,1710,1714,1710,1713,1714,1710,1710,1716,1706,1714,1710,1708,1712,1709,1706,1710,1708,1703,1706,1706,1702,1710,1706,1699,1701,1706,1700,1703,1705,1702,1706,1702,1696,1705,1700,1706,1699,1699,1700,1698,1704,1698,1702,1701,1694,1696,1701,1697,1700,1699,1694,1696,1698,1694,1697,1692,1696,1700,1692,1694,1698,1693,1698,1696,1692,1694,1700,1692,1694,1694,1689,1694,1696…	-0.00001675167384984908,0.00002177771735648004,0.000022047841904325146,0.00004964651218131622,0.00006904675146642059,0.000039254461598052385,0.00006958517397830372,0.000007003238868397652,0.00009745245520329298,0.00009225529999292695,0.00010072264467807303,0.00021305206280885263,0.00009306152524527086,0.000005893172043524935,0.00005807619312276599,0.00011572885179147031,0.00015972199367320067,0.0…	0.0504	0.00133	0.0002892492515680415,0.0001801883071160316,0.00009301606169672018,0.00009055258917738796,0.00003345136811271774,0.00011841116403966471,0.00002579614744796067,-0.00009956544847124832,-0.00011294632375643702,-0.00007171382827101067,-0.00010967079322890765,-0.00010393740701543374,-0.0001582702959580997,-0.00017437685896354492,-0.00019321196918957562,-0.00026390468221861545,-0.00031548133336197994,-…	3920.22	868	1712	0.779	19.843	23.10156,23.08984,23.08984	15.87109,15.89551,15.9082	0	10.96	20.49	-12.05	-12.05	20.49,21.81,22.71	0.42	22.29	2406,2412,2402,2403,2404,2404,2408,2412,2412,2412,2410,2412,2410,2414,2414,2420,2422,2422,2422,2324,2316,2288,2264,2242,2216,2198,2183,2166,2153,2139,2124,2100,2090,2075,2068,2056,2038,2030,2018,2045,2092,2118,2142,2164,2180,2190,2197,2209,2230,2241,2250,2258,2261,2264,2276,2287,2297,2306,2304,2305,2310,2315,2322,2328,2334,2341,2344,2341,2348,2350,2354,2357,2355,2366,2366,2371,2377,2369,2374,2370…	87.98	0.388	0.00022477097600218728,0.00019863469900646474,0.00017301193684749112,0.00014789260019664472,0.00012326679795628863,0.0000991248333650106,0.0000754572001793847,0.000052254578930751054,0.000029507833255542704,0.000007208006297713303,-0.000014653682818156289,-0.00003608584244444986,-0.000057096911800179166,-0.00007769516429404649,-0.00009788871078221799,-0.00011768550276208866,-0.0001370933355032980…	178.47	0.000017007425108331656,-0.000055450217197063136,0.00005042746233371444,0.00006227387872412097,-0.000011812337625118345,0.0000048962263396277376,0.000005392330961762213,0.000010752290670183777,0.000008005817670890093,0.00002633639088333564,0.00004304628360853915,0.000003009044390136942,0.00005700995475905466,0.000010486326613562723,0.000051516373003705843,0.00004228398038418323,-0.000035040013491…	0.00003913652929554701,0.00003079011821682798,0.00002244370753601288,0.000014097297253101715,0.000005750887339672772,-0.0000025955221758522384,-0.000010941931293473317,-0.000019288340013190464,-0.000027634748335003678,-0.00003598115628733467,-0.00004432756387018344,-0.00005267397102670657,-0.000061020377785325763,-0.00006936678420288445,-0.00007771319016569578,-0.0000860595957874466,-0.0000944060…	0.00022477097600218728,0.00019863469900646474,0.00017301193684749112,0.00014789260019664472,0.00012326679795628863,0.0000991248333650106,0.0000754572001793847,0.000052254578930751054,0.000029507833255542704,0.000007208006297713303,-0.000014653682818156289,-0.00003608584244444986,-0.000057096911800179166,-0.00007769516429404649,-0.00009788871078221799,-0.00011768550276208866,-0.0001370933355032980…	0.563	0.315	0.122	1	0.877	0.419	0.2	0.381	0.0003219267715077341,0.0002679559155856087,0.00040289563327347734,0.00037590433535594694,0.0003219267715077341,0.0003219267715077341,0.00048387959350212385,0.00042988860879803197,0.0003219267715077341,0.00023197907077333665,0.00037590433535594694,0.00039389834757717364,0.00014204999545085997,0.00046588185280197863,0.0002679559155856087,0.00033991854738293014,0.0003669076088155708,0.0001780193910…	none	0.367	37.367	620
2559577	10	1	7	10	32.51,32.52,32.52	15.4922	940.142	32.52	1376,1385,1386,1385,1386,1387,1387,1392,1387,1398,1393,1389,1398,1396,1392,1391,1396,1393,1394,1398,1396,1395,1396,1396,1397,1398,1393,1402,1400,1395,1398,1398,1394,1398,1403,1398,1401,1402,1398,1402,1404,1402,1404,1408,1404,1402,1406,1410,1404,1409,1402,1409,1409,1406,1410,1411,1405,1414,1406,1406,1414,1414,1410,1416,1412,1419,1410,1412,1421,1418,1414,1420,1420,1414,1422,1420,1418,1425,1420,1416…	0.00007954883156957041,0.00010478392267236954,0.000013450610154857401,0.000007181798101993727,0.00006391401890324319,0.000045043077092856454,0.00007657378378746307,0.00008920353862236979,0.00010813330382999472,0.000042014172174245165,0.000051493196148743965,0.0001302684903118181,0.0001933008926778111,0.00014922381132038227,0.00013980119332353331,0.00020282920384871874,0.00022490652892636997,0.000…	0.0157	0.0008	0.00027225834426150206,0.00018093539837353516,0.00011167908763516085,0.000045586217827223856,-0.00000790131459699402,-0.000007869606803060092,-0.000004690166501532808,-0.00008334278780713426,-0.0001273645640069726,-0.00024688308035690303,-0.00025942677081641834,-0.00017130643975173495,-0.00032854102317643957,-0.0004228325824523339,-0.00035990459298705397,-0.00030326070718325376,-0.000372397655361…	4641.29	1020	1385.33	0.78	63.686	23.05078,23.40918,23.86816	15.2959,15.34473,15.49219	92.0758	13.419	18.05	-14.47	-14.47	18.05,20.25,21.95	0.49	28.02	1608,1604,1602,1604,1601,1601,1605,1606,1611,1617,1616,1618,1620,1610,1610,1610,1611,1612,1617,1550,1542,1532,1507,1498,1490,1486,1473,1471,1468,1463,1456,1454,1442,1437,1430,1430,1431,1430,1429,1432,1478,1494,1502,1502,1510,1520,1526,1532,1534,1532,1534,1544,1554,1554,1553,1550,1554,1558,1558,1563,1558,1566,1566,1569,1577,1579,1581,1586,1579,1580,1586,1579,1586,1588,1587,1589,1589,1590,1590,1593…	88.712	0.375	0.0002660385469036941,0.00021683591491133438,0.00017066908497559213,0.00012735074813038634,0.0000867051523715588,0.00004856738959240327,0.00001278272651526616,-0.000020794023095334975,-0.00005229908748514891,-0.0000818602896180959,-0.00010959756578209827,-0.00013562345219693585,-0.00016004354159839966,-0.00018295691165120625,-0.00020445652692883834,-0.00022462961609123218,-0.00024355802579060397,…	0.00011	0.00006460881520619942,-0.00001772005382580482,-0.00008680938617442997,0.00001933777434496552,0.00008251388365503402,0.00006466643567797392,0.00003855230788215533,-0.00001897313704308877,-0.000018630899014832437,-0.000008369034583154996,0.00005976338313242655,0.00007829503013578076,0.000019111122608326426,0.00002772039147358206,0.000021448989545767,0.00003832551037616333,0.000007253143527539293,-…	0.000006019536772325858,-0.000004091401378359747,-0.000013312940910677982,-0.000021723316889522403,-0.000029393882510113647,-0.00003638971445482067,-0.000042770165000371275,-0.00004858936555950105,-0.000053896685929061896,-0.00005873715314082745,-0.00006315183346850402,-0.0000671781808318747,-0.0000708503545539195,-0.00007419950916674642,-0.00007725405872503196,-0.00008003991786939293,-0.00008258…	0.0002660385469036941,0.00021683591491133438,0.00017066908497559213,0.00012735074813038634,0.0000867051523715588,0.00004856738959240327,0.00001278272651526616,-0.000020794023095334975,-0.00005229908748514891,-0.0000818602896180959,-0.00010959756578209827,-0.00013562345219693585,-0.00016004354159839966,-0.00018295691165120625,-0.00020445652692883834,-0.00022462961609123218,-0.00024355802579060397,…	0.702	0.217	0.081	1	-0.312	-0.217	2.676	-1.46	0.0004001955017906654,0.0005723386401189258,0.0005632767736403482,0.00036396353398057387,0.00034584868353667756,0.0003277345886496448,0.0003096212492561817,0.0005089095451394068,0.0003186778245200956,0.0005723386401189258,0.000653903948256787,0.00036396353398057387,0.0005632767736403482,0.0005632767736403482,0.0003186778245200956,0.00036396353398057387,0.0005723386401189258,0.00045454912175729213…	none	0.662	41.438	620
2559576	10	1	6	10	32.48,32.48,32.48	15.625	940.142	32.48	1517,1518,1524,1520,1524,1526,1522,1524,1524,1526,1526,1523,1531,1526,1521,1526,1524,1525,1526,1524,1526,1528,1524,1524,1527,1524,1530,1526,1530,1525,1532,1526,1525,1529,1531,1529,1528,1534,1526,1532,1526,1528,1534,1532,1532,1534,1528,1533,1536,1530,1536,1536,1534,1536,1530,1534,1534,1540,1537,1534,1540,1541,1532,1542,1538,1534,1538,1534,1536,1534,1541,1540,1534,1538,1542,1538,1537,1541,1534,1544…	0.00000920315336825124,0.00007084051514431244,0.0000335117868057185,-0.00006317807442235063,-0.00005102488184368367,-0.00001908389887261342,-0.000004457420403661433,-0.000017039977790533952,0.0000915884715441296,0.00008889723834999575,0.00011341966812626265,0.00009093667215847075,0.000023932099122754425,0.0001375057635579673,0.00014470937839708564,0.00014449092086385435,0.00005522194402353588,0.0…	0.0279	0.00075	0.00021761474122313865,0.00012586554419737937,0.00014048845953858446,0.00014274361497480678,0.0000658557283223107,-0.0000382117630182553,-0.000050787265289599696,-0.000018861924683240227,-0.00001660429853614721,-0.00012064092855407326,-0.00009366483476891675,-0.00009140608219397362,-0.00011139186948057125,-0.00015856010556851075,-0.0002131337418052261,-0.00028005035449968373,-0.000282729395039764…	4216.89	851	1520.67	0.798	35.81	22.22461,22.31152,22.45996	15.31934,15.44141,15.625	98.8223	24.031	20.19	-12.29	-12.29	20.19,22.15,23.35	0.31	18.12	1710,1708,1710,1714,1718,1722,1722,1726,1729,1730,1730,1721,1722,1728,1724,1728,1728,1732,1738,1666,1654,1640,1628,1613,1606,1598,1590,1582,1574,1568,1558,1557,1554,1550,1546,1537,1526,1524,1522,1532,1567,1578,1587,1598,1604,1612,1616,1622,1633,1638,1645,1653,1654,1649,1652,1662,1665,1673,1675,1670,1673,1676,1677,1684,1679,1690,1694,1700,1704,1698,1697,1700,1706,1707,1713,1714,1708,1708,1716,1721…	63.031	0.234	0.0002028880846606237,0.0001764694665960881,0.0001509801515601352,0.00012638745032894421,0.00010265982355696,0.0000797668413286993,0.00005767914413336642,0.000036368405212228085,0.000015807294230460694,-0.000004030557773123289,-0.00002317059220341617,-0.00004163735553679572,-0.000059454530801189044,-0.00007664496794879166,-0.00009323071316039296,-0.00010923303711889219,-0.0001246724622882624,-0.0…	0.00012	0.000003133403329422401,0.00002263813068689735,-0.000025345965678115958,-0.0000701115121688841,0.000021696425393593628,0.00001066970539080723,-0.00003249276365258006,-0.00003227101664526026,-0.00000794746248935432,0.0000019153817268858888,-0.00005088625911114336,-0.000010495874070268033,0.00008453859208336488,0.00010565405980094012,0.0000030241139334255684,-0.000014429321773361748,0.0000757826597…	0.00005202591929332143,0.000041131110234233643,0.000031261462299260665,0.000022320511628898715,0.0000142208712550433,0.000006883376999174346,2.3631373835417352e-7,-0.000005785285523274504,-0.000011240274628218421,-0.000016181969490690642,-0.000020658669195123033,-0.000024714128061241483,-0.000028387983289568466,-0.000031716142367069826,-0.00003473113401936715,-0.00003746242613964856,-0.0000399367…	0.0002028880846606237,0.0001764694665960881,0.0001509801515601352,0.00012638745032894421,0.00010265982355696,0.0000797668413286993,0.00005767914413336642,0.000036368405212228085,0.000015807294230460694,-0.000004030557773123289,-0.00002317059220341617,-0.00004163735553679572,-0.000059454530801189044,-0.00007664496794879166,-0.00009323071316039296,-0.00010923303711889219,-0.0001246724622882624,-0.0…	0.639	0.292	0.068	0.999	0.701	0.074	0.623	0.304	0.0005081554695400407,0.00030986806126254813,0.00014770022047657012,0.00012968530885291594,0.00015670795652393955,0.0002558053857966202,0.00021976734064241973,0.00036393746749967856,0.00007564505719316534,0.00020174943942621477,0.0004360404821347447,0.00012968530885291594,0.00032789044872875886,0.00021976734064241973,0.00014770022047657012,0.00019274076913117864,-0.000014407088588075887,0.0003188…	none	0.448	34.58	620
2559575	10	1	5	10	32.45,32.45,32.45	14.9023	940.174	32.45	2054,2067,2061,2067,2067,2061,2060,2067,2063,2062,2068,2063,2066,2069,2061,2062,2069,2061,2068,2066,2065,2070,2069,2061,2069,2067,2064,2068,2061,2067,2067,2060,2073,2066,2063,2061,2065,2065,2064,2068,2061,2065,2063,2062,2061,2065,2061,2068,2065,2060,2067,2063,2063,2063,2060,2065,2060,2059,2061,2059,2061,2059,2056,2057,2057,2054,2054,2059,2055,2057,2053,2060,2059,2051,2061,2059,2049,2058,2057,2049…	-0.0000202299517830683,0.000036805555237505595,0.000028902382804311838,0.00003598552804047209,0.000028082546072286876,0.00010760352826600638,0.00015215978535803684,0.00006681554406729321,0.000021447961457642356,0.00004601353583642808,0.00007057998108108409,0.00004769092618648506,0.00008974105716529797,0.0001292963809413425,0.00007892912126680235,0.0001134870300725829,0.0001255654275475111,0.00014…	0.0115	0.00061	0.00025132645898958604,0.00017097029418534687,0.0001230997189370974,0.000027787245571357686,-0.000005083761127583585,-0.00003545487321380926,-0.00007331271347437381,-0.00009618880320210137,-0.00014652010248843996,-0.00014443191493539393,-0.00014983161883707694,-0.00022760544452059075,-0.0002903935379941409,-0.00031824425494447354,-0.000256274184704111,-0.00024669983539948317,-0.000297007859439023…	4254.44	961	2065	0.774	86.97	22.23926,22.38672,22.60938	14.8291,14.85352,14.90234	9.291	9.616	24.09	-8.36	-8.36	24.09,24.43,24.57	0.28	23.22	2721,2717,2719,2721,2721,2725,2729,2734,2735,2738,2744,2741,2732,2735,2733,2731,2733,2737,2738,2602,2590,2560,2525,2492,2470,2446,2433,2420,2406,2378,2362,2348,2338,2326,2316,2301,2298,2292,2284,2325,2421,2461,2496,2523,2541,2549,2565,2579,2583,2592,2609,2613,2623,2625,2633,2625,2637,2644,2641,2644,2648,2649,2653,2656,2661,2669,2673,2677,2677,2685,2683,2681,2681,2689,2689,2697,2690,2687,2693,2697…	100.177	0.424	0.000250552937027438,0.00019959940163448507,0.00015289004279109666,0.00011007134166006238,0.00007081922576833785,0.00003483661627108961,0.0000018511795164707868,-0.00002838673410611312,-0.00005610597963402991,-0.00008151634961613949,-0.00010481016192345554,-0.0001261637153030594,-0.00014573862369160112,-0.0001636830393871076,-0.00018013277433665272,-0.00019521232802633055,-0.00020903582975309628,…	0.00059	-0.0000350815162149853,0.000035008253931668235,0.000017944294039886277,0.00001197333441653475,-0.000008258802615960855,-0.00003324338991213797,-0.000020199844611820303,-0.00005469011305414704,0.000059768292583986526,-0.000009589789964604792,0.000024054614545894967,0.000021252910182400358,0.00001528194775833977,0.00004100446453679295,0.0000033402995072921582,0.000005292512327260799,-0.000014939102…	0.0000078238448963095,0.0000023665343277118073,-0.000003040307151089337,-0.000008397146277141923,-0.000013704445471120078,-0.000018962662877241242,-0.00002417225240281505,-0.00002933366375742661,-0.00003444734249175604,-0.00003951373003604065,-0.000044533263738180304,-0.000049506376901491404,-0.000054433498822110244,-0.0000593150548260519,-0.00006415146630592598,-0.00006894315075731171,-0.0000736…	0.000250552937027438,0.00019959940163448507,0.00015289004279109666,0.00011007134166006238,0.00007081922576833785,0.00003483661627108961,0.0000018511795164707868,-0.00002838673410611312,-0.00005610597963402991,-0.00008151634961613949,-0.00010481016192345554,-0.0001261637153030594,-0.00014573862369160112,-0.0001636830393871076,-0.00018013277433665272,-0.00019521232802633055,-0.00020903582975309628,…	0.515	0.341	0.145	1.001	2.376	0.059	-0.087	1.027	0.0025197766622970176,0.0024400367663800476,0.0023514540500382576,0.0023514540500382576,0.0024843349010285625,0.002342596772071276,0.002581806705013083,0.0024577554780328254,0.0023868849684265045,0.0024223187776008276,0.0025995312017772472,0.0023780269678366954,0.0024400367663800476,0.0024666151049550686,0.0024046015116359113,0.0024577554780328254,0.0025995312017772472,0.002333739674741528,0.0023…	none	0.309	34.89	620
2559574	10	1	4	10	32.43,32.44,32.43	15.1582	940.173	32.43	1717,1716,1720,1717,1725,1724,1719,1725,1723,1717,1717,1723,1721,1717,1723,1715,1720,1719,1715,1720,1714,1719,1713,1717,1714,1717,1715,1721,1720,1711,1717,1717,1709,1713,1717,1721,1717,1713,1719,1716,1713,1717,1717,1717,1717,1709,1713,1717,1711,1715,1715,1709,1717,1709,1713,1711,1705,1716,1715,1709,1717,1715,1709,1719,1713,1709,1713,1709,1709,1709,1712,1708,1716,1715,1711,1708,1715,1708,1712,1705…	-0.0000020241371529824345,-0.00005836015144990391,0.0000033677876082465884,0.00008759402723635623,0.00003687090332129392,0.000008643751000872557,0.00008443005421222549,0.00008150128474494116,-0.000016998973794723622,-0.000025545336305468734,0.00003617377227781491,0.0000501115781600762,0.0000640491171598866,0.00011452932186477951,0.00011441113473989491,0.0001761386425089949,0.00020132125880862201,…	0.0157	0.00081	0.0003161127665642254,0.00026537919041795066,0.0001640570507072873,0.00003747394596063254,0.00005702698120792142,0.000006335487025662247,-0.0001089531233475657,-0.00010344813453775916,-0.00010075200761367762,-0.0001429910554020862,-0.00015995154208435614,-0.00019094993297573542,-0.00022194452410745493,-0.00022766890705032668,-0.0003709313676653596,-0.0003626176842009397,-0.00033465883835730886,-0…	4123.7	905	1717.67	0.781	63.579	23.1875,23.52051,24.19043	15.23242,15.19531,15.1582	165.796	6.406	19.49	-12.94	-12.94	19.49,21.05,22.29	0.3	24.93	2181,2176,2177,2181,2188,2189,2195,2197,2197,2193,2197,2189,2190,2192,2195,2199,2197,2197,2204,2102,2078,2051,2023,2006,1989,1967,1950,1934,1907,1892,1878,1859,1851,1836,1820,1816,1803,1794,1790,1809,1863,1888,1913,1933,1951,1967,1973,1985,1999,2005,2024,2035,2042,2056,2063,2061,2069,2073,2081,2091,2095,2097,2108,2115,2123,2125,2125,2129,2131,2141,2145,2149,2149,2149,2152,2153,2155,2161,2165,2171…	95.016	0.372	0.0003059015825471707,0.0002558556115311081,0.00020889246228868337,0.00016482223361716035,0.00012346672218979183,0.00008465870196900413,0.00004824124800758634,0.000014067101903591779,-0.000018001923656911934,-0.000048095503677043764,-0.00007633532520574782,-0.00010283557939416829,-0.0001277034232414491,-0.00015103941289708664,-0.00017293791027194307,-0.00019348746460210402,-0.00021277117050847805…	0.00029	0.00002474711212806346,-9.924246383705503e-7,0.00007444474421808036,0.000010158835215163274,0.00008559795802134689,0.000024522290720761687,-0.0000012172460688857061,0.00006458317524850829,0.000042053298281790766,-0.000035073958536400875,0.000022691513878552934,0.000029070406465782718,-0.000012727929393924807,0.00004182847668835828,0.00006748065043033718,0.00004334457460298428,0.000006362501324556…	0.0001652379083123521,0.00012133003238333154,0.0000841304274860333,0.00005261420003854544,0.000025913040301391097,0.0000032912994062618203,-0.000015874278649671077,-0.00003211172845165093,-0.00004586841115135167,-0.00005752333980136482,-0.00006739762161785623,-0.00007576330486821088,-0.00008285087412599527,-0.00008885560039647184,-0.00009394292106621343,-0.00009825299790086086,-0.0001019045786693…	0.0003059015825471707,0.0002558556115311081,0.00020889246228868337,0.00016482223361716035,0.00012346672218979183,0.00008465870196900413,0.00004824124800758634,0.000014067101903591779,-0.000018001923656911934,-0.000048095503677043764,-0.00007633532520574782,-0.00010283557939416829,-0.0001277034232414491,-0.00015103941289708664,-0.00017293791027194307,-0.00019348746460210402,-0.00021277117050847805…	0.583	0.304	0.113	1	-0.552	-1.044	2.103	-0.059	0.0002396009625928514,0.0001863448793970503,0.0003194973342934926,0.00015084445170710019,0.00007985230084965268,-0.00007983762136825416,-0.00013305454967786967,-0.00009757732203873042,-0.000044356046029614446,-0.00015079207676494755,-0.00009757732203873042,0.00004436057673377347,0.00004436057673377347,0.00016859430281427462,0.00004436057673377347,-0.00009757732203873042,0.00011534692568280049,0.0…	none	0.394	36.78	620
2559573	10	1	3	10	32.41,32.41,32.42	15.2315	940.141	32.42	1484,1485,1485,1483,1488,1484,1488,1484,1481,1482,1483,1478,1485,1486,1482,1483,1478,1484,1482,1476,1482,1478,1483,1482,1478,1481,1476,1482,1481,1475,1485,1478,1476,1478,1474,1480,1477,1474,1478,1472,1482,1477,1476,1477,1470,1473,1476,1474,1478,1473,1478,1475,1470,1478,1470,1477,1470,1470,1472,1470,1475,1466,1468,1474,1470,1474,1469,1475,1475,1470,1473,1470,1473,1470,1479,1475,1465,1476,1471,1468…	0.00003258231216075654,0.00006832238713345129,-0.00006031389860091098,-0.000004035830926821826,0.000028765325534412445,-0.00002061870596562777,0.00010318079177647836,0.00008901512480311407,0.00010714242571315953,0.0000606858518001149,0.00008761859539446798,0.00006758310239023697,0.000047548851816180586,0.00008915766000771797,0.0000955417322974108,0.00005202392986479502,0.00008189032585978412,0.00…	0.0058	0.0004	0.0001925634132632126,0.00007564961249122288,0.000035071327271775655,-0.000011371803164657494,-0.00008715107284455074,-0.00014824792132035286,-0.0001418660614084524,-0.00012668305361974102,-0.00015257139868958991,-0.00018432445376773387,-0.00015740923019412373,-0.00010702309731220442,-0.00024144120426773194,-0.0002643881028796644,-0.00025800743268235445,-0.00016656961850743256,-0.0001660549739356…	4724.14	982	1484.33	0.792	173.138	23.07324,23.25879,23.51758	15.08496,15.13379,15.23145	125.625	4.234	18.83	-13.59	-13.59	18.83,20.71,22.09	0.4	24.86	1649,1654,1658,1658,1666,1666,1664,1672,1664,1663,1666,1668,1663,1666,1671,1674,1672,1674,1676,1595,1584,1571,1561,1548,1542,1537,1528,1532,1531,1526,1523,1520,1515,1507,1508,1507,1499,1502,1498,1517,1565,1586,1598,1595,1602,1610,1610,1621,1621,1628,1630,1636,1641,1638,1630,1638,1638,1638,1639,1646,1650,1653,1652,1648,1652,1650,1652,1650,1653,1653,1653,1662,1662,1666,1662,1658,1659,1658,1661,1662…	80.517	0.281	0.00018521084161040533,0.00012143289811695319,0.00006779425855259289,0.00002268299442707676,-0.000015256561227765681,-0.00004716455385865093,-0.00007399987061868467,-0.00009656895648823245,-0.00011555004926018831,-0.00013151356169042457,-0.00014493922333024423,-0.00015623049718082368,-0.00016572670441359366,-0.00017371322152415742,-0.00018043005636082953,-0.00018607906075142398,-0.000190829996479…	9e-05	-0.000015157266785816767,0.000018761832685749463,0.00008466644882540698,0.00009460394737354637,0.00003258021826108769,0.00002652638535472519,-0.000022697223027024982,-0.00005113259022482062,0.000006766536690968161,0.000050281428459897954,0.00004422735870720483,0.000057362075507390654,-0.00003503325842095898,0.00001007625442649688,0.00006638409526645841,-0.00004839530449934076,0.000020696338262389…	0.000020744256959973038,0.000010539452672946248,0.0000015393711973140701,-0.000006398210385802965,-0.000013398724943279576,-0.000019572797430758458,-0.000025017993032834898,-0.00002982035892746984,-0.00003405578403821488,-0.00003779119826160219,-0.00004108563012037487,-0.000043991139556020426,-0.000046553640600971574,-0.00004881362693067239,-0.000050806811760976324,-0.00005256469220279282,-0.0000…	0.00018521084161040533,0.00012143289811695319,0.00006779425855259289,0.00002268299442707676,-0.000015256561227765681,-0.00004716455385865093,-0.00007399987061868467,-0.00009656895648823245,-0.00011555004926018831,-0.00013151356169042457,-0.00014493922333024423,-0.00015623049718082368,-0.00016572670441359366,-0.00017371322152415742,-0.00018043005636082953,-0.00018607906075142398,-0.000190829996479…	0.686	0.245	0.069	1	0.59	0.156	0.394	0.45	0.0003286468444316707,0.000258327141897334,0.00028469569607332253,0.00031985625891991094,0.00039897793477221933,0.00018801882348198237,0.00039018592558290153,0.00024953797960205294,0.00010014942876581984,0.0001528689321671323,0.0003462285492658994,0.00013529505328152563,0.00028469569607332253,0.00027590600012582966,0.000258327141897334,0.0004253550303214525,0.00008257768302075311,0.00036381096589…	none	0.573	39.86	620
2559572	10	1	2	10	32.4,32.41,32.41	15.4023	940.154	32.41	1286,1282,1291,1285,1290,1288,1285,1288,1285,1289,1284,1293,1289,1285,1286,1286,1284,1290,1284,1292,1288,1282,1292,1288,1286,1290,1282,1290,1287,1285,1289,1282,1293,1288,1284,1288,1286,1291,1287,1292,1288,1290,1283,1291,1284,1292,1291,1286,1292,1286,1291,1284,1290,1285,1286,1283,1288,1286,1285,1288,1289,1285,1291,1288,1283,1290,1283,1282,1290,1285,1286,1286,1288,1286,1285,1286,1282,1285,1280,1291…	0.00006701490509335551,0.00004422749614225182,0.000046528723090230405,0.000030014752280355127,-0.000027259484275393056,-0.000028093131697231398,0.00009963741786745683,0.00006430589390366252,0.000007029573959605934,0.00003127926394790832,0.0000868878352423903,0.0001330933702106616,-0.000011982648682863035,0.00003421244892750983,0.000020836655792578158,0.00015483898964376217,0.00011323445638538457,…	0.0143	0.00029	0.00010989238850409876,0.00005888934630749731,0.00000475869559523707,0.000016464224810922625,0.00007519662163670556,-0.000032223630537356776,-0.00011141074058841445,-0.00008717164264919545,-0.00005352928032755447,-0.00001675073233592032,-0.0000708655918682744,-0.00011870516290519214,-0.00007253106300731833,-0.00012350274938387494,-0.0001807333308168033,-0.0001658991263610516,-0.000125998549892325…	3927.09	806	1286	0.795	69.995	23.7041,24.0127,24.34766	15.58594,15.5127,15.40234	478.121	24.962	23.19	-9.22	-9.22	23.19,24.51,25.23	1.18	23.25	1465,1459,1462,1462,1470,1472,1474,1474,1474,1468,1465,1468,1474,1476,1476,1478,1478,1478,1470,1408,1406,1395,1384,1367,1362,1353,1342,1340,1334,1330,1325,1325,1321,1318,1317,1302,1303,1302,1296,1307,1340,1350,1363,1369,1376,1384,1389,1396,1397,1401,1406,1414,1409,1418,1419,1424,1425,1433,1436,1442,1443,1435,1436,1442,1449,1450,1454,1460,1459,1449,1450,1454,1457,1457,1464,1468,1468,1472,1461,1462…	76.756	0.26	0.00009552667410442882,0.00007595729111266021,0.00005771083605073308,0.000040697876446081096,0.00002483502563329685,0.000010044534045939863,-0.000003746091862196128,-0.000016604444934160186,-0.00002859354860680388,-0.000039772165811428726,-0.000050195086992156185,-0.00005991339865370142,-0.00006897473375480168,-0.0000774235051745666,-0.00008530112339605458,-0.0000926461994740208,-0.00009949473428…	0.0001	-0.000021881327383586626,0.00001632971680398183,-0.000016686880847058585,-0.00004307581164732315,-0.000013148792040757326,-0.000021318130267124383,0.000028488743835860127,0.0000020970836431390903,-0.00004748147935327214,-0.000032462076399862336,0.000043848680207416086,-0.00002892411434874584,-0.00004371835259712495,0.00008891780694208656,0.000042642613811744165,0.00007754566254034495,-0.000006827…	0.00007127997397070299,0.00003284831713031477,0.000009022727691216945,-0.0000057478744318716085,-0.000014904864551099036,-0.000020581712884354086,-0.000024101057841504652,-0.000026282865105028856,-0.000027635469920165005,-0.00002847401318496938,-0.00002899386554619139,-0.000029316146445473483,-0.00002951594351439113,-0.000029639807103071085,-0.000029716595960304023,-0.000029764200980132542,-0.000…	0.00009552667410442882,0.00007595729111266021,0.00005771083605073308,0.000040697876446081096,0.00002483502563329685,0.000010044534045939863,-0.000003746091862196128,-0.000016604444934160186,-0.00002859354860680388,-0.000039772165811428726,-0.000050195086992156185,-0.00005991339865370142,-0.00006897473375480168,-0.0000774235051745666,-0.00008530112339605458,-0.0000926461994740208,-0.00009949473428…	0.673	0.26	0.068	1.001	-2.895	-0.089	1.068	0.021	-0.00012170886924462622,-0.000012717447749862562,-0.000030884584265176046,-0.00019435462392463222,-0.00004905096085594068,-0.00019435462392463222,-0.00017619432444245892,0.000023619105308712677,-0.00002180111100208717,-0.00004905096085594068,-0.00019435462392463222,-0.00004905096085594068,0.000023619105308712677,-0.00013987144716598769,0.00013264700928803985,0.00005995869882863119,-0.000194354623…	none	0.53	37.939	620
2559571	10	1	1	10	32.44,32.44,32.43	15.0977	940.159	32.43	1413,1419,1418,1426,1422,1416,1422,1421,1426,1420,1422,1418,1424,1420,1425,1419,1423,1422,1418,1419,1416,1426,1418,1421,1416,1429,1422,1416,1421,1418,1417,1416,1422,1422,1416,1422,1414,1424,1416,1423,1414,1422,1419,1422,1419,1422,1419,1422,1417,1426,1419,1420,1422,1417,1423,1420,1421,1414,1422,1419,1422,1419,1422,1416,1426,1418,1426,1421,1420,1422,1420,1424,1416,1426,1422,1418,1422,1416,1418,1420…	0.0000553399046904224,0.00007689693807704575,0.00007732103888831462,0.000056612892659248514,-0.000011047832275606615,-0.000008275238834277555,-0.000005502693067309311,0.00007239751042586533,-0.00004221113993745403,-0.00001361761745440042,0.000012629569401412682,0.00004826843306812944,-0.000007647807885699204,0.00004207424541820059,0.000159893952941639,0.0001650135122708277,0.00006447582215023516,…	0.0162	0.00038	0.00014599645513555258,0.00008302951310708326,0.00009049627024163955,0.000025192259780211837,-0.000009590071582604557,-0.000034981437509445606,-0.00009087675605736629,-0.00005994526098389534,-0.00004543968393558681,-0.00003328073461151349,-0.00008448076317125811,-0.00009344069889525813,-0.00010240023857705032,-0.00016297340718711203,-0.00011327960665984753,-0.0001761955344353202,-0.00014527239040…	4504.96	933	1421	0.793	61.623	23.39941,23.5957,24.09082	14.80469,14.8291,15.09766	533.604	17.326	21.43	-11	-11	21.43,23.05,24.23	0.32	19.13	1610,1611,1606,1606,1612,1611,1609,1610,1612,1614,1611,1614,1616,1617,1618,1614,1616,1614,1618,1554,1554,1536,1525,1514,1506,1490,1483,1478,1476,1472,1468,1464,1458,1445,1442,1438,1435,1430,1436,1445,1480,1499,1506,1517,1529,1539,1544,1545,1545,1549,1556,1557,1563,1563,1568,1570,1574,1577,1584,1590,1590,1587,1589,1590,1588,1592,1594,1595,1598,1598,1599,1606,1612,1614,1618,1606,1606,1609,1608,1610…	62.046	0.275	0.00012697044726841438,0.0001045491383324346,0.00008346778372513507,0.000063646304374947,0.00004500940693886432,0.000027486297795158122,0.00001101041412861247,-0.000004480828913210706,-0.00001904627595312341,-0.000032741254909927236,-0.00004561778716557057,-0.00005772478517218288,-0.00006910823824961179,-0.00007981138727922697,-0.00008987488895757941,-0.00009933697023384503,-0.0001082335735176946…	0.00011	-0.00001165762336411372,-0.0000723814234318949,0.000036991204062126265,0.00010892562446740784,-0.000004878443107257097,-0.00005311993893259671,-0.000012412916154838739,0.000004887857148287434,0.00005184341190634571,0.000022323521361138506,0.000009972401358609952,0.0001037553563766707,0.00003365111847295374,-0.00003332079866835813,0.00002923738337812278,-0.00004709653114921343,-0.00002667616905741…	0.00008274818612338943,0.000037747190309763496,0.000011354664636323306,-0.000004124224193338664,-0.000013202400430262768,-0.000018526638151430843,-0.000021649237511884972,-0.0000234806032916551,-0.000024554676597948643,-0.00002518460726501458,-0.000025554053785084503,-0.00002577072958502216,-0.000025897807253177586,-0.000025972336728774158,-0.000026016047341451644,-0.00002604168307342678,-0.00002…	0.00012697044726841438,0.0001045491383324346,0.00008346778372513507,0.000063646304374947,0.00004500940693886432,0.000027486297795158122,0.00001101041412861247,-0.000004480828913210706,-0.00001904627595312341,-0.000032741254909927236,-0.00004561778716557057,-0.00005772478517218288,-0.00006910823824961179,-0.00007981138727922697,-0.00008987488895757941,-0.00009933697023384503,-0.0001082335735176946…	0.685	0.247	0.068	1	-0.515	-0.286	1.63	-0.344	0.0003966432402622534,0.0003966432402622534,0.0001508923446281743,0.0003088590987342171,0.00021231703278073102,0.0001684413690533785,0.00028252731595329036,0.0000982495256902428,0.0001947662353686434,0.0001684413690533785,0.00003684096748174483,0.00018599110263027991,0.00013334402929740822,0.00013334402929740822,0.0003088590987342171,0.00013334402929740822,0.0001245701375246307,-0.000024558908880…	none	0.567	31.898	620
2559513	2	1	10	2	27.7,27.73,27.75	29.8203	940.142	27.75	1681,1681,1688,1684,1687,1694,1684,1691,1689,1689,1684,1688,1685,1689,1684,1688,1692,1686,1690,1686,1684,1692,1688,1692,1688,1696,1685,1686,1685,1689,1686,1691,1690,1690,1689,1696,1688,1693,1686,1692,1688,1695,1688,1692,1688,1694,1688,1694,1697,1690,1694,1689,1696,1700,1690,1698,1690,1695,1696,1693,1700,1694,1696,1694,1694,1701,1694,1697,1693,1698,1694,1697,1698,1694,1701,1694,1698,1694,1698,1692…	-0.000016779545477213352,0.0001580115493216367,0.0000017703125860769827,0.000007196660552955643,0.00008960003158402696,0.00014378545937663133,0.00003373812149895975,0.000003245375836124205,0.00007024832793226328,0.00008593794185703522,0.0001298547484517143,0.0001327143857235185,0.00008681994058308154,0.000056325090563035444,0.00008484211467207176,0.00009026764915846171,0.00014957787530468225,0.00…	0.0085	0.00051	0.0002354363059349085,0.000048418135470817035,0.00008206287686652016,0.0000669642827175115,-0.00005586123867830939,-0.00012993264259174577,-0.00017578804231670303,-0.0001677994554315342,-0.00019057649149294855,-0.00011849041526568863,-0.00029507886972052845,-0.00022301063374142224,-0.00023809312075457798,-0.0001967811489519092,-0.00021699124535266663,-0.00026283121410099045,-0.0002727851670970958…	5286.33	1183	1684.33	0.776	117.983	27.71191,27.7002,27.82324	30.26367,29.96387,29.82031	60.0692	15.245	19.69	-8.06	-8.06	19.69,20.71,21.51	0.38	26.41	1812,1814,1816,1820,1818,1820,1825,1824,1822,1824,1817,1818,1818,1818,1820,1822,1830,1829,1830,1739,1730,1714,1692,1682,1674,1666,1660,1654,1648,1645,1643,1645,1641,1636,1630,1624,1630,1627,1627,1643,1691,1710,1725,1734,1741,1748,1758,1761,1764,1764,1771,1772,1778,1778,1781,1785,1786,1789,1788,1794,1793,1797,1797,1804,1802,1805,1803,1802,1806,1805,1808,1809,1814,1812,1812,1812,1812,1813,1814,1814…	86.173	0.407	0.00020713934940238236,0.00015011443813639584,0.00009943574900052885,0.00005439701986423718,0.00001437058751564208,-0.000021201359501523808,-0.00005281455459150465,-0.00008090956168557551,-0.00010587791497505548,-0.00012806757536207305,-0.00014778777966960492,-0.0001653133501897522,-0.00018088852462845446,-0.0001947303598210452,-0.00020703175665309287,-0.0002179641483420587,-0.0002276798895438709…	0.00015	0.000019654458874802073,0.00006528774098317665,0.000053849553136163506,0.00006926941001555305,-0.00004623049548042805,0.00002960780370534035,0.00002656298877957274,-0.00003690281198762723,0.00003054434415355296,0.000012393370814576148,-0.00001582686968776828,0.00004826624832299027,-0.00007561791946436851,-0.000021603570774165656,0.000018989593482882237,0.00003105109645201521,-0.000039127905619115…	0.000017369735328919543,0.000008846412110130218,8.200039606151837e-7,-0.000006738459578651152,-0.000013856259970831657,-0.000020559088152740455,-0.000026871137263523106,-0.000032815189967196274,-0.000038412700684229236,-0.00004368387302897258,-0.00004864773273243645,-0.00005332219631362527,-0.00005772413574729077,-0.00006186943936151447,-0.00006577306918492334,-0.00006944911495052668,-0.000072910…	0.00020713934940238236,0.00015011443813639584,0.00009943574900052885,0.00005439701986423718,0.00001437058751564208,-0.000021201359501523808,-0.00005281455459150465,-0.00008090956168557551,-0.00010587791497505548,-0.00012806757536207305,-0.00014778777966960492,-0.0001653133501897522,-0.00018088852462845446,-0.0001947303598210452,-0.00020703175665309287,-0.0002179641483420587,-0.0002276798895438709…	0.681	0.226	0.092	0.999	0.432	0.133	-0.047	0.913	0.00038972384685181125,0.0004839125049457758,0.00028613991112865183,0.0003520541025395679,0.0005969658654445098,0.00020140779069544037,0.000502752688099664,0.0003520541025395679,0.00044623459038577916,0.00037088856627188723,0.000502752688099664,0.00020140779069544037,0.0004273968588378702,0.0002955556117198874,0.0003143876253344692,0.00044623459038577916,0.0003143876253344692,0.000615810953725106…	none	0.617	35.39	620
2559512	2	1	9	2	27.44,27.46,27.49	30.4658	940.183	27.49	1665,1669,1666,1665,1677,1674,1681,1670,1678,1673,1679,1676,1676,1681,1678,1679,1676,1676,1680,1676,1682,1678,1682,1678,1677,1682,1684,1679,1678,1680,1686,1678,1685,1681,1687,1681,1685,1686,1688,1692,1686,1695,1691,1690,1689,1690,1683,1692,1686,1688,1692,1696,1690,1699,1688,1690,1696,1697,1694,1692,1697,1692,1698,1691,1694,1693,1698,1692,1698,1696,1697,1698,1697,1698,1696,1699,1700,1701,1696,1702…	0.000021499372947539766,0.000009312461042205335,-0.000056884708731788344,0.00008217337293193048,-0.000038044739587806535,0.00004339126931087106,0.00003840652155001746,0.000029821185906583816,-0.000057971720616669375,0.00018191086866602157,0.00009768888533795204,0.0001467220675467107,0.00010932329595540208,0.000035923589366154175,0.0001821792656693122,0.0001843938347270805,0.00021902252101677232,0…	0.014	0.00064	0.00026749547559774887,0.00013646431947859802,0.000037874834490797654,0.0001696993160320031,0.00010350580263140842,-0.000016663948723415105,-0.00005763241969612101,-0.0001309780320890218,-0.00018991877287600345,-0.00011214827353038099,-0.00013511406779295504,-0.00026239019560513684,-0.000123480843113619,-0.00031908310167196193,-0.0003060734029748571,-0.00026789124351656507,-0.00019014481531665802…	5129.71	1078	1666.67	0.79	71.541	28.08203,29.0166,29.79004	30.64355,30.42871,30.46582	346.76	17.806	17.33	-10.16	-10.16	17.33,19.03,20.19	0.44	26.23	1912,1913,1916,1917,1928,1929,1934,1936,1933,1931,1928,1930,1929,1928,1933,1934,1936,1941,1941,1868,1856,1841,1824,1810,1797,1787,1781,1770,1762,1751,1742,1730,1728,1721,1713,1708,1702,1699,1694,1708,1754,1777,1788,1796,1802,1812,1818,1827,1830,1838,1842,1848,1852,1854,1861,1864,1867,1870,1876,1880,1883,1881,1885,1892,1891,1895,1894,1900,1910,1905,1910,1910,1916,1916,1913,1913,1916,1921,1928,1922…	86.369	0.298	0.00024666637514159274,0.0002025843863329699,0.00016154590523921657,0.00012334080206671843,0.00008777345479851252,0.00005466174754868643,0.00002383613807237163,-0.000004861210343308411,-0.00003157723705232517,-0.000056448736424960576,-0.0000796030582775523,-0.00010115875994318115,-0.00012122621332210986,-0.0001399081700202579,-0.00015730028746939844,-0.00017349161872297553,-0.00018856506843544963…	0.00018	-0.00002914798052541349,0.00003755772457620726,-0.000013495362445709003,0.000018380357634026116,0.00003367134967898591,-0.00001903961942395181,-0.00001535945253540166,0.000029785029061362038,-0.00003287590737696519,0.000015583867323783143,0.000025898762721900356,-0.000023494121262959366,0.0000067220744351082645,0.000010402416540232822,-0.000024062906036928213,0.000037666756994612795,-0.0000631370…	0.00011547356462470586,0.00006253024840586077,0.000025100656292694886,-0.0000013611233201827764,-0.00002006893552832603,-0.00003329488792968435,-0.00004264530341262645,-0.000049255811832017425,-0.000053929274914225734,-0.00005723329569373125,-0.00005956915523073352,-0.00006122054913553246,-0.00006238804306468665,-0.00006321343188963684,-0.00006379696101586211,-0.00006420950142210492,-0.0000645011…	0.00024666637514159274,0.0002025843863329699,0.00016154590523921657,0.00012334080206671843,0.00008777345479851252,0.00005466174754868643,0.00002383613807237163,-0.000004861210343308411,-0.00003157723705232517,-0.000056448736424960576,-0.0000796030582775523,-0.00010115875994318115,-0.00012122621332210986,-0.0001399081700202579,-0.00015730028746939844,-0.00017349161872297553,-0.00018856506843544963…	0.675	0.25	0.075	1	1.176	0.158	0.602	0.24	0.0005064743033898199,0.00031782442049988683,0.0002459793479560357,0.0005424169072258851,0.00027291985737210045,0.00029088112546972873,0.0002369995495146905,0.0003268058903097008,0.0002190405096318999,0.00043459801841415493,0.00014721177564089516,0.00020108221236453424,0.00045256597447485144,0.00014721177564089516,0.0002639395018771128,0.00025495933207425207,0.00015618971773558008,0.0002908811254…	none	0.553	44.128	620
2559511	2	1	8	2	27.18,27.2,27.22	29.0518	940.121	27.22	1771,1767,1775,1778,1773,1782,1782,1778,1784,1775,1778,1776,1779,1774,1781,1777,1777,1781,1774,1781,1772,1780,1774,1778,1771,1778,1781,1773,1780,1773,1780,1773,1772,1774,1778,1768,1774,1775,1771,1777,1768,1769,1766,1770,1769,1770,1774,1765,1772,1766,1766,1769,1768,1768,1764,1769,1764,1768,1764,1764,1764,1769,1766,1770,1766,1772,1765,1764,1761,1770,1762,1766,1761,1765,1765,1767,1760,1762,1761,1764…	-0.00005152519675694604,-0.00006340530551730555,-0.000059539526914363385,0.00007030253443497804,-0.00001087111832725669,-0.000007006837918576711,0.00016063854879144884,0.00006370524702285896,0.000017180609976230965,0.00008402702468658835,0.00010363553797413534,0.00011379539562304629,0.00019954678905436573,0.000014454517542509017,0.0002765652366760218,0.00023002125242802497,0.0001142030652385796,0…	0.0321	0.00118	0.0003658560321680956,0.00018388210432680459,0.00011217342588483547,0.00006566349166945313,0.00010415144651924333,0.00001987525471847927,-0.000045498971365697774,-0.00004792998109897207,-0.000009453327506929084,-0.00020379575306885792,-0.00011499865995521472,-0.00013630129062035693,-0.00022365037685734222,-0.0002952551979948673,-0.0003008208451164639,-0.00034411309061854734,-0.0003685377319785965…	4751.46	1094	1773.33	0.77	31.15	27.16016,27.62695,28.13086	28.60352,28.56836,29.05176	47.4635	16.813	17.29	-9.93	-9.93	17.29,18.93,20.15	0.38	22.86	2498,2506,2507,2512,2510,2517,2515,2529,2532,2532,2535,2537,2533,2534,2530,2534,2537,2537,2540,2435,2414,2383,2372,2346,2322,2302,2281,2262,2238,2220,2202,2190,2174,2158,2150,2133,2126,2118,2107,2118,2176,2198,2218,2238,2249,2266,2280,2291,2302,2316,2325,2332,2345,2350,2356,2364,2374,2382,2386,2396,2401,2406,2412,2420,2420,2429,2434,2441,2440,2446,2453,2454,2460,2462,2467,2469,2474,2476,2478,2479…	81.031	0.46	0.0002747251395111168,0.00023865232946426534,0.00020368586434020585,0.0001697918127904635,0.00013693728413334333,0.0001050903964369171,0.00007422024558089541,0.00004429687526736627,0.000015291247951297257,-0.000012824783337407673,-0.00004007850230763985,-0.0000664963558831117,-0.0000921039798663691,-0.00011692622381569368,-0.00014098717515903655,-0.00016431018256838367,-0.00018691787861723353,-0.…	0.00035	0.00007560373772583684,-0.00002922111147661342,0.00002718944515798307,-0.0000035963908806530518,0.00008079000423042602,0.00005164576550782601,0.00004553806584521819,0.00013157936728470522,0.00012382480686661408,0.0000946777604009893,0.00013958362364275187,0.00006436111515916351,0.000059898669779949386,0.00009163639974393953,0.00008223715254289599,0.00007612904924546734,0.00014571794084129695,0.00…	0.000047328082537559325,0.0000309705524232216,0.000015371271340161412,4.950908528012356e-7,-0.00001369150817789606,-0.00002722049112004204,-0.00004012234159546786,-0.00005242613016568558,-0.0000641595798339297,-0.00007534912851086867,-0.0000860199885847351,-0.00009619620373009757,-0.0001059007030832769,-0.00011515535290647545,-0.00012398100585702854,-0.00013239754797279342,-0.0001404239434795423,…	0.0002747251395111168,0.00023865232946426534,0.00020368586434020585,0.0001697918127904635,0.00013693728413334333,0.0001050903964369171,0.00007422024558089541,0.00004429687526736627,0.000015291247951297257,-0.000012824783337407673,-0.00004007850230763985,-0.0000664963558831117,-0.0000921039798663691,-0.00011692622381569368,-0.00014098717515903655,-0.00016431018256838367,-0.00018691787861723353,-0.…	0.627	0.256	0.118	1.001	1.228	0.301	0.23	0.47	0.0007493490169733542,0.0005150385273926733,0.0006411900054804387,0.0005330579237773794,0.0004790019774069637,0.0006862529867818502,0.0004249527584572439,0.0006411900054804387,0.00046098482368188995,0.0005871205992433211,0.0004970198786232412,0.0007223067386987478,0.0005871205992433211,0.0005240481321292415,0.0006862529867818502,0.0005871205992433211,0.0005060291095598758,0.0007313206443642982,0.…	none	0.502	40.257	620
2559510	2	1	7	2	26.89,26.92,26.94	28.6367	940.116	26.94	1430,1435,1443,1438,1444,1438,1445,1443,1445,1442,1444,1448,1443,1449,1448,1450,1449,1446,1446,1449,1453,1447,1454,1448,1457,1451,1459,1454,1459,1456,1457,1458,1456,1462,1455,1461,1459,1463,1460,1462,1465,1468,1462,1466,1464,1466,1466,1470,1470,1469,1472,1470,1476,1467,1474,1474,1470,1474,1467,1475,1476,1472,1474,1468,1474,1480,1475,1476,1482,1474,1478,1476,1478,1474,1474,1484,1476,1482,1478,1482…	-0.00008063568609218048,-0.000004080526133239977,-0.000054718661142734716,0.00000509781816889594,0.000014707301341236088,-0.000029234628088030968,0.000033924741163777476,0.00008369897113899082,0.0000933058000194578,-0.000007532789003993017,0.0001392962728538657,0.000025067083341654998,0.000051405387657291596,0.0001915407373220519,0.0002446617315257881,0.00012037804121474008,0.00020026508641371473…	0.0205	0.00098	0.00033239266111474816,0.0003352958704751736,0.0002946845802990009,0.00016038410403068623,0.00000941170776485654,-0.000007742308424293552,-0.000058334296381577843,0.00005493846103308577,-0.00006587973577751264,-0.00012648608844864138,-0.00004333364609460394,-0.00021424070097725244,-0.00022803120672492072,-0.00024850333899550134,-0.0001854339164331682,-0.0003462326772121456,-0.00038339337699650557…	4946	1064	1438.67	0.785	48.876	27.05469,27.42383,27.81934	28.66992,28.52637,28.63672	40.9175	29.285	18.79	-8.15	-8.15	18.79,19.59,20.45	1.14	23.57	1678,1689,1692,1691,1695,1696,1694,1697,1691,1694,1693,1693,1695,1702,1696,1709,1710,1708,1706,1635,1627,1612,1602,1589,1582,1577,1567,1564,1556,1552,1540,1534,1526,1520,1513,1508,1500,1498,1492,1513,1539,1553,1562,1572,1579,1584,1589,1594,1600,1604,1610,1612,1614,1620,1622,1626,1630,1634,1635,1638,1644,1646,1648,1649,1654,1654,1659,1657,1662,1665,1665,1667,1670,1673,1675,1676,1676,1677,1675,1680…	73.863	0.338	0.0003584027047255317,0.000311508325234911,0.00026685086048732084,0.0002243236071289281,0.0001838249516761117,0.0001452581277229199,0.0001085309847300022,0.00007355576784257196,0.00004024890821129946,0.000008530823315134359,-0.000021674273191044286,-0.00005043855255829782,-0.00007783074338768884,-0.00010391629584856419,-0.00012875753806344294,-0.00015241382503316777,-0.00017494168045815848,-0.000…	0.00024	0.00004142618923398105,0.0000642583665093662,0.000019811245291009483,0.00005471809916080776,0.00003959744415883516,-0.00005831572329337383,0.00004385833487330212,0.00006324015469401317,0.000029143466337255563,0.000043349310651786706,0.00001442915129157372,0.00009764105711223975,0.000018689818205156914,0.00005532138335898002,0.0000833296881277848,0.00002163086826121338,0.00007896470728571284,0.000…	0.000027879349183173826,0.000018101626200021112,0.00000871590816778212,-2.935210349556104e-7,-0.000008941747444520903,-0.000017243252273303712,-0.00002521193615813826,-0.00003286114243652961,-0.00004020367948969782,-0.00004725184218985263,-0.00005401743248761203,-0.00006051177917403724,-0.0000667457568503754,-0.000072729804137274,-0.00007847394115395866,-0.00008398778629664077,-0.0000892805723442…	0.0003584027047255317,0.000311508325234911,0.00026685086048732084,0.0002243236071289281,0.0001838249516761117,0.0001452581277229199,0.0001085309847300022,0.00007355576784257196,0.00004024890821129946,0.000008530823315134359,-0.000021674273191044286,-0.00005043855255829782,-0.00007783074338768884,-0.00010391629584856419,-0.00012875753806344294,-0.00015241382503316777,-0.00017494168045815848,-0.000…	0.709	0.217	0.073	0.999	0.757	0.227	-0.044	0.817	0.0007203639155871468,0.0008336187359186621,0.0005505370429606147,0.000843057970901047,0.0005505370429606147,0.0005977045132109679,0.0006826188710733031,0.0005128067547736751,0.0007203639155871468,0.0004656485036221287,0.0006637475789199073,0.0005316714891294284,0.00094690309841738,0.0005788369103796757,0.0005128067547736751,0.0005977045132109679,0.0004373560106812554,0.0004939428398221021,0.0004…	none	0.668	40.533	620
2559509	2	1	6	2	26.57,26.6,26.63	29.001	940.161	26.63	1672,1676,1685,1681,1686,1688,1686,1684,1688,1684,1690,1689,1692,1690,1694,1693,1690,1694,1689,1694,1692,1692,1689,1698,1691,1700,1694,1698,1702,1698,1698,1704,1698,1708,1696,1706,1702,1704,1703,1708,1704,1710,1707,1714,1708,1714,1708,1715,1719,1711,1715,1714,1718,1721,1716,1723,1718,1722,1727,1722,1730,1722,1730,1722,1726,1725,1726,1730,1726,1731,1737,1733,1730,1736,1732,1732,1738,1732,1736,1735…	-0.00003874537827069229,-0.000018720168296611958,-0.00004947239865493908,-0.000011676500654802493,0.00012261561827491883,-0.00000971095593204225,0.000010312657784225384,0.00011412814537462868,0.00007575028444579279,-0.000051472337589213384,0.00009548543589617237,0.00007488442206285229,0.00014569008152622422,0.0001352430411160947,-0.0000097521208970843,0.0001930651643347351,0.00011406164730135186,…	0.0535	0.00123	0.0002423935163229164,0.00007961416102138729,0.00011740204542419964,0.00007903689591576858,0.00005336697548734173,0.0000936888247301374,-0.00008677318360171,0.00005757878433536926,-0.000001075904694194613,-0.00011806956618297448,-0.0001614754209288695,-0.00012624736540854737,-0.00015443222271690587,-0.00020290277280328353,-0.00017782417448234072,-0.00025164653414986215,-0.00028488865744144575,-0.…	4892.65	1118	1680.67	0.771	18.678	26.99316,27.39941,27.81641	28.80469,28.74707,29.00098	113.815	23.484	21.11	-5.52	-5.52	21.11,22.71,23.43	0.34	17.55	1842,1846,1849,1853,1854,1859,1866,1868,1868,1868,1864,1861,1868,1873,1873,1874,1874,1874,1872,1808,1807,1789,1776,1764,1752,1742,1736,1724,1714,1708,1697,1689,1682,1673,1673,1665,1661,1657,1652,1660,1701,1720,1729,1750,1758,1756,1766,1780,1785,1790,1795,1800,1801,1809,1813,1817,1819,1824,1824,1825,1829,1826,1829,1832,1841,1844,1846,1846,1854,1858,1854,1857,1863,1864,1864,1862,1869,1862,1865,1866…	59.451	0.445	0.00018930732799398776,0.00016653282855135475,0.00014417975240684161,0.00012224030147045583,0.00010070682194941749,0.00007957180167805929,0.00005882786749713425,0.00003846778268161606,0.000018484444416096623,-0.0000011291186831005606,-0.000020379748999956515,-0.000039274162305788334,-0.00005781895010211358,-0.00007602058192015951,-0.0000938854075778218,-0.00011141965939486225,-0.00012862945436711…	0.00012	0.00005229185040852032,0.000076757586219094,0.00003069312288799321,0.000029354828939746933,-0.00003218376661959246,0.00007140371475210599,-0.00006237698912635107,0.00007216740098205774,0.000022663456357331193,0.000029925756204502644,0.00006643178888271413,0.000027249197337123702,-0.000003329916832304317,0.00009338214585466624,-0.000030085231733372773,0.00005457904276797424,0.000051520463136805946…	0.00003575221443606514,0.00002296026469333253,0.000011544433728444866,0.0000013566828976595686,-0.000007735100898842009,-0.000015848818438197763,-0.000023089687093013367,-0.00002955160527317899,-0.00003531837008521357,-0.000040464763999546276,-0.000045057524617459594,-0.00004915621011347462,-0.00005281397157609503,-0.000056078242262499016,-0.000058991352705322344,-0.00006159107964813756,-0.000063…	0.00018930732799398776,0.00016653282855135475,0.00014417975240684161,0.00012224030147045583,0.00010070682194941749,0.00007957180167805929,0.00005882786749713425,0.00003846778268161606,0.000018484444416096623,-0.0000011291186831005606,-0.000020379748999956515,-0.000039274162305788334,-0.00005781895010211358,-0.00007602058192015951,-0.0000938854075778218,-0.00011141965939486225,-0.00012862945436711…	0.656	0.238	0.106	1	0.915	0.188	0.462	0.349	0.00030034532744947334,0.00046513905714472764,0.0002615794181223676,0.00033911469740045234,0.0004166638216462288,0.0003294220304454799,0.00033911469740045234,0.0004942267958048126,0.0003294220304454799,0.00031003734547958915,0.0002131268970247753,0.00046513905714472764,0.0001840579788691281,0.00008717563481210743,0.0004457483136533731,0.0002615794181223676,0.00031972957980839144,0.000174368771843…	none	0.566	34.29	620
2559508	2	1	5	2	26.26,26.29,26.31	27.8389	940.121	26.31	1894,1898,1896,1902,1897,1905,1901,1910,1902,1901,1902,1902,1903,1902,1908,1902,1908,1900,1904,1900,1904,1901,1904,1910,1904,1906,1902,1898,1906,1899,1909,1901,1906,1904,1902,1906,1902,1910,1898,1903,1897,1903,1897,1902,1900,1904,1900,1902,1899,1903,1896,1902,1897,1906,1897,1903,1900,1902,1901,1898,1902,1901,1898,1906,1898,1899,1902,1902,1898,1896,1904,1897,1896,1902,1906,1900,1902,1901,1896,1901…	0.00002266024090668394,-0.00003065810801174816,-0.00002069648015292475,0.00008905712987639505,0.000025997359380287728,0.00006273122144202993,0.00019440783034843404,0.00007291662281510861,-0.0000071689075733412504,0.00009527083761133382,0.00006142200153456837,0.00018334576215902018,0.00011541391869237527,0.00015214655356624458,0.00012072887798562718,0.00015259228408437227,0.00008467218527785098,0.…	0.0287	0.00104	0.0002632344697262984,0.00019773615095362298,0.00006412036150179706,0.0001276072827760999,0.000025644859516652554,-0.000030076937673136525,-0.00005903650273836881,0.00000442941918275827,-0.000126672497937589,-0.00017020966277445326,-0.0002137404678716171,-0.0002694184175721261,-0.00021084758813091328,-0.0002616622529212344,-0.00022253976984668266,-0.0003268164555179369,-0.00037518161452303856,-0.…	4634.77	1036	1898.67	0.776	34.865	25.71582,26.26855,26.44043	27.88379,27.62207,27.83887	73.717	20.312	16.17	-10.14	-10.14	16.17,19.29,21.05	0.33	21.4	2459,2466,2478,2480,2483,2486,2489,2489,2488,2489,2493,2486,2496,2498,2500,2500,2501,2503,2493,2386,2367,2336,2312,2291,2269,2250,2228,2204,2193,2180,2158,2153,2137,2126,2114,2102,2092,2081,2070,2090,2159,2190,2210,2231,2251,2268,2285,2298,2308,2318,2328,2338,2348,2358,2365,2374,2379,2386,2391,2397,2401,2410,2416,2418,2422,2427,2428,2435,2437,2442,2443,2450,2450,2454,2458,2458,2462,2462,2462,2468…	80.6	0.405	0.00023793215654355378,0.00020225049018910226,0.00016779142268430036,0.00013451306282562844,0.00010237495477238704,0.0000713380288653346,0.00004136455413048033,0.000012418092410287473,-0.00001553654593346957,-0.00004253334479904932,-0.00006860512365829304,-0.00009378357745460438,-0.00011809931513386202,-0.00014158189685510667,-0.0001642598699262397,-0.00018616080350841713,-0.00020731132213133133,…	0.00026	-0.000016617129582506187,0.000005630136770232101,0.000016014380490500902,0.00006707821658629062,0.000013055162490506477,0.00008784979936162991,-0.000023799258263410102,0.00007132928760528382,0.000025780162564257558,-0.00005196240910747408,-0.000019548902885272637,-0.000015944234976895646,0.00008596621366402501,-0.000008734820121230828,0.0000423258397900053,0.00005440586551189779,-0.00000131006279…	0.00004422069250670506,0.00002582746161578265,0.000008741354681178595,-0.000007130519700869546,-0.000021874451561047304,-0.000035570598686772913,-0.000048293422413066256,-0.00006011209244372685,-0.00007109086290369698,-0.00008128942166707879,-0.00009076321485998573,-0.00009956374830243925,-0.00010773886752815025,-0.00011533301790455707,-0.00012238748626730616,-0.00012894062538285972,-0.0001350280…	0.00023793215654355378,0.00020225049018910226,0.00016779142268430036,0.00013451306282562844,0.00010237495477238704,0.0000713380288653346,0.00004136455413048033,0.000012418092410287473,-0.00001553654593346957,-0.00004253334479904932,-0.00006860512365829304,-0.00009378357745460438,-0.00011809931513386202,-0.00014158189685510667,-0.0001642598699262397,-0.00018616080350841713,-0.00020731132213133133,…	0.59	0.292	0.118	1	0.775	0.462	0.104	0.434	0.0006057748403523542,0.0003756342395665479,0.0003852209967803395,0.00026060965641772955,0.0005290477553237613,0.00039480796561999987,0.00027977830479561247,0.0004331579574240115,0.00024144185405770125,0.0002126917366375275,0.00027977830479561247,0.0002701938748498122,0.0002893629462645991,0.0004331579574240115,0.00022227489764070567,0.00046192267380653165,0.00017436120710955397,0.000471511335989…	none	0.415	33.239	620
2559507	2	1	4	2	25.92,25.95,25.98	24.8154	940.118	25.98	2161,2166,2169,2172,2173,2174,2181,2172,2174,2172,2177,2174,2178,2174,2177,2175,2180,2172,2180,2176,2179,2172,2176,2170,2174,2170,2177,2181,2178,2173,2176,2176,2176,2177,2176,2183,2174,2174,2175,2174,2171,2176,2180,2177,2175,2177,2182,2178,2178,2182,2180,2176,2177,2174,2183,2174,2180,2178,2179,2173,2181,2177,2182,2176,2178,2177,2180,2184,2182,2177,2182,2176,2180,2178,2184,2179,2181,2179,2184,2179…	-0.00006667269818470099,-0.000010590595661980292,0.00006847910844922178,0.00007203661540953265,-0.0000393052486613285,0.000039754367081407344,-0.000005928235964594271,0.00012566451096779306,0.0001193707438415016,0.00004085362086204398,0.00006738959588470473,0.00011034062786911303,0.000008855158453827646,0.00010760416680164881,0.0001341401907356668,0.00013769571018929953,0.00016423163460482434,0.0…	0.0353	0.00114	0.00024739516223769515,0.00018200476288505888,0.00017899358130713943,0.00013331118609162128,-0.00001737015801995156,-0.00004334106166077075,0.00014397513558582365,-0.00010839525946447117,-0.00010155706920465823,-0.00017999255604356934,-0.00023545831178291816,-0.0001663159423447997,-0.00013652187811634555,-0.00020182730207563378,-0.00032612682271422014,-0.0002242181099737932,-0.0003353942343042850…	4845.14	1171	2169	0.758	28.298	24.08203,24.70898,25.38574	23.84961,23.99609,24.81543	0.0071	16.358	18.25	-7.73	-7.73	18.25,19.85,20.95	0.55	20.53	2900,2904,2902,2905,2902,2915,2914,2920,2922,2926,2925,2925,2932,2934,2934,2936,2934,2936,2935,2821,2803,2768,2736,2709,2688,2669,2646,2626,2610,2598,2581,2556,2550,2536,2522,2504,2496,2485,2464,2488,2556,2582,2610,2630,2650,2664,2681,2698,2708,2720,2732,2745,2752,2765,2773,2780,2788,2796,2803,2809,2817,2818,2826,2830,2837,2838,2846,2850,2852,2858,2863,2864,2870,2872,2876,2878,2881,2881,2886,2887…	82.639	0.555	0.0002385888031693242,0.0002068889644646501,0.00017607358447594746,0.00014611798587827656,0.00011699817986992038,0.0000886908469618675,0.00006117331830328334,0.0000344235575280256,0.000008420143107657754,-0.00001685774880316748,-0.00004143036104269223,-0.0000653173716527605,-0.00008853790963722933,-0.00011111057028070491,-0.00013305343003986705,-0.0001543840610193142,-0.0001751195450435132,-0.000…	1.02487	-0.000005937637720079955,-0.000010514709301739686,0.000028152439665780445,-0.00005625611377684906,0.00011215134968824622,-0.0000022120600948074492,-1.3638284880954183e-7,0.000033541470200059684,0.00007054880386810426,0.000017733411065436214,0.00010797169463981091,0.000003589195762846864,0.000048910703219497496,0.00007593812845989653,0.00005805264530940052,0.000015218469029873375,0.000033927073523…	-0.000015219281881639901,-0.000022539788340436573,-0.000029860242509727186,-0.00003718064438995583,-0.00004450099398134455,-0.00005182129128455948,-0.00005914153629982266,-0.00006646172902735614,-0.00007378186946760401,-0.0000811019576212324,-0.00008842199348801927,-0.00009574197706907484,-0.00010306190836417706,-0.00011038178737399207,-0.00011770161409874191,-0.00012502138853887068,-0.0001323411…	0.0002385888031693242,0.0002068889644646501,0.00017607358447594746,0.00014611798587827656,0.00011699817986992038,0.0000886908469618675,0.00006117331830328334,0.0000344235575280256,0.000008420143107657754,-0.00001685774880316748,-0.00004143036104269223,-0.0000653173716527605,-0.00008853790963722933,-0.00011111057028070491,-0.00013305343003986705,-0.0001543840610193142,-0.0001751195450435132,-0.000…	0.552	0.288	0.16	1	1.241	0.239	0.22	0.542	0.0008206021512928654,0.0007933448903144984,0.0006480017169515233,0.0008387746090608076,0.0005299461940494418,0.0006934162337089333,0.0005662675524300668,0.0005390262488675349,0.0006570842403884619,0.0008387746090608076,0.0005299461940494418,0.0007479199232828833,0.0005844293708081134,0.0008932965452196535,0.0006116735225387142,0.00072066722347346,0.0005753483666801889,0.0006661669537746847,0.000…	none	0.393	41.539	620
2559506	2	1	3	2	25.57,25.59,25.63	22.2959	940.101	25.63	1638,1637,1646,1643,1652,1646,1654,1652,1657,1657,1654,1659,1663,1662,1663,1663,1662,1669,1659,1668,1666,1670,1665,1674,1666,1670,1668,1675,1672,1676,1674,1678,1678,1680,1680,1682,1682,1688,1686,1685,1686,1687,1684,1692,1686,1694,1690,1692,1693,1696,1692,1697,1694,1701,1696,1701,1696,1706,1702,1704,1705,1708,1702,1710,1706,1712,1704,1714,1712,1716,1710,1714,1712,1718,1716,1723,1718,1724,1717,1725…	-0.00008482113931232316,-0.00006341773002149629,-0.000013804759955070031,-0.00002061222222115821,-0.000018016313716743682,0.00009115553214190314,0.000012248660538375458,0.000058724459369784537,0.00011774117284379664,0.00008271726881918363,0.00006963799665441644,0.00013805352019713443,0.0001500479330120173,0.00008995170610177658,0.00015522810528233446,0.00021737496268212612,0.00026698602810005314,…	0.0416	0.00141	0.00029613926439367677,0.00027678195956329024,0.0001320721676111241,0.000056335897000101585,0.0001435180875475607,0.00007091733189995252,0.000013994118496281306,-0.00002099586501715488,3.883443787146094e-7,-0.00018175083136615455,-0.00016976162889504925,-0.00020159552976580482,-0.000274108938047659,-0.000205787942193379,-0.0002219671361369326,-0.0003257569641105329,-0.00022928679087876665,-0.0003…	5102	1120	1642	0.78	24.01	22.91113,23.46484,24.09277	21.82422,21.88574,22.2959	108.998	25.89	18.83	-6.8	-6.8	18.83,21.05,22.33	0.4	21.11	1840,1843,1845,1844,1848,1845,1849,1854,1854,1852,1851,1852,1856,1855,1858,1867,1865,1868,1869,1802,1790,1772,1759,1747,1736,1722,1714,1698,1690,1681,1668,1660,1650,1646,1641,1634,1628,1620,1617,1629,1664,1679,1689,1701,1707,1714,1723,1731,1735,1742,1752,1754,1758,1764,1772,1773,1780,1782,1789,1792,1795,1800,1802,1807,1807,1810,1815,1819,1822,1822,1825,1830,1832,1833,1834,1840,1842,1842,1844,1848…	69.191	0.373	0.0002818353591492039,0.00024845844880698464,0.0002158733838462986,0.00018406137825304836,0.00015300409169903962,0.00012268361896837824,0.00009308247963471235,0.00006418360798338021,0.0000359703431726463,0.00000842641962835373,-0.000018464042333538305,-0.00004471654566194638,-0.00007034622550845782,-0.00009536785795308082,-0.00011979586852298402,-0.00014364434050913224,-0.00016692702308561858,-0.…	0.00019	0.000026888798299696876,0.00006750258500289959,-0.000028624272655532547,0.000013592955377574237,0.00005742302792642946,0.000030468060282688672,0.00007108199418670709,0.000034473725338492624,0.00008313242823814644,-0.00001943145135365569,0.0000839206421597091,0.000021571820441004326,-0.0000037721399735879483,0.00006901416590655759,0.0000018418423653749346,0.00009715368146630036,-0.0000520588828351…	0.00003171658685314157,0.000012464342107737926,-0.000004799769029383081,-0.00002028105639593941,-0.00003416362797013183,-0.00004661257933634155,-0.0000577759570499025,-0.00006778651924985522,-0.00007676331445740147,-0.00008481309733559049,-0.0000920315982468636,-0.00009850466170640545,-0.00010430926727012019,-0.00010951444499793022,-0.00011418209637935335,-0.00011836773048404466,-0.00012212112409…	0.0002818353591492039,0.00024845844880698464,0.0002158733838462986,0.00018406137825304836,0.00015300409169903962,0.00012268361896837824,0.00009308247963471235,0.00006418360798338021,0.0000359703431726463,0.00000842641962835373,-0.000018464042333538305,-0.00004471654566194638,-0.00007034622550845782,-0.00009536785795308082,-0.00011979586852298402,-0.00014364434050913224,-0.00016692702308561858,-0.…	0.678	0.234	0.087	0.999	1.03	0.227	0.349	0.424	0.0006575505623522992,0.0004464632811567523,0.000587176734869485,0.0003849154787452536,0.0005168143090355617,0.00035854051905800976,0.00041129204029660975,0.0003673319943142358,0.0005344038467914524,0.0003409581024282611,0.0004024996751158791,0.00046404996977004434,0.00042887730468483274,0.0005080198073007854,0.00033216716104038965,0.0005168143090355617,0.00037612364754092666,0.000455256536442098…	none	0.593	40.187	620
2559505	2	1	2	2	25.2,25.23,25.25	21.5098	940.071	25.25	1349,1348,1352,1349,1355,1349,1355,1352,1353,1354,1352,1351,1354,1348,1346,1356,1354,1352,1357,1350,1356,1350,1352,1347,1352,1347,1350,1344,1350,1347,1353,1346,1354,1346,1349,1350,1343,1352,1344,1347,1346,1349,1344,1349,1345,1352,1348,1349,1343,1350,1344,1352,1346,1349,1346,1350,1354,1352,1347,1349,1347,1350,1349,1353,1348,1351,1346,1353,1347,1354,1351,1356,1354,1357,1348,1349,1354,1348,1352,1348…	0.0000064808208440948335,-0.00003061621286168269,0.000014392180951785688,7.535959233645895e-7,-0.0000011552896014893672,0.00008784127769206903,-0.00005188296039670609,-0.00000688137792891592,0.00013782918655058798,0.00011245507047285401,0.00014280278095080533,0.000008938988522929655,0.00006273663469200917,0.00011653851296845575,0.0000999655697910635,0.00008925813753962305,0.00008734738002132452,0…	0.0211	0.00075	0.00030257080317507636,0.0001716166489329616,0.00013451938843997584,0.00010915356918572357,0.000004648409416568539,-0.00005294202445435982,0.00007703874721797967,-0.00010949717176244412,-0.00008503242490313207,-0.000022473840329786946,-0.00010935205118544489,-0.00013762304249029093,-0.00019811132375074393,-0.00020001359247256919,-0.00015212227045876444,-0.00035023227829118753,-0.00026428994899807…	4250.34	932	1349.67	0.781	47.3	23.32324,23.86523,24.38086	20.79785,21.05078,21.50977	146.285	20.016	19.79	-5.46	-5.46	19.79,21.25,22.23	0.57	22.02	1529,1526,1528,1530,1532,1534,1532,1543,1543,1546,1544,1542,1539,1540,1544,1542,1542,1544,1552,1492,1488,1474,1464,1454,1446,1434,1427,1420,1415,1412,1405,1402,1394,1388,1387,1380,1376,1370,1366,1378,1410,1421,1429,1438,1442,1449,1454,1457,1464,1467,1462,1467,1474,1474,1482,1486,1489,1492,1492,1500,1500,1503,1506,1509,1514,1514,1516,1523,1518,1518,1524,1525,1533,1529,1530,1533,1532,1538,1531,1534…	71.762	0.371	0.00024795756454731703,0.00021308634974409146,0.00017982612710576483,0.0001481024714719291,0.00011784439600088516,0.00008898419332503465,0.0000614572840446268,0.00003520207222084196,0.000010159807544856759,-0.00001372554612553284,-0.00003650743615589793,-0.00005823684073235453,-0.00007896238293355045,-0.00009873043953271567,-0.00011758524477323902,-0.00013556898934998608,-0.0001527219148178445,-0…	0.00011	0.0000388479501846134,0.00006801699037656749,0.000060329888878675456,0.00011674473201178961,0.0000353418524060514,-0.00003963736227889172,0.000044004239850678104,0.0000010670849183380035,0.000006199058333386115,0.000011331084705779431,0.000006849561780359299,0.000018390703127093023,0.000041148603225759904,0.00007352250565260885,-0.000023893238242778234,0.00003251022080209124,0.0000168123867100861…	0.00007186157585701181,0.000057461242527976676,0.00004502062574347377,0.00003427303105642599,0.000024988058007425088,0.00001696666093850064,0.000010036881972230685,0.0000040501646823713,-0.0000011218305693030974,-0.00000558997790083859,-0.000009450062762642037,-0.000012784835328255624,-0.00001566578444271977,-0.000018154670157360563,-0.000020304847704559354,-0.000022162411295077635,-0.00002376718…	0.00024795756454731703,0.00021308634974409146,0.00017982612710576483,0.0001481024714719291,0.00011784439600088516,0.00008898419332503465,0.0000614572840446268,0.00003520207222084196,0.000010159807544856759,-0.00001372554612553284,-0.00003650743615589793,-0.00005823684073235453,-0.00007896238293355045,-0.00009873043953271567,-0.00011758524477323902,-0.00013556898934998608,-0.0001527219148178445,-0…	0.682	0.232	0.086	1	1.479	1.119	0.693	-0.812	-0.0009953162635591153,-0.001224816818268495,-0.001189516933513321,-0.0012601138340472887,-0.0010129744587638577,-0.0012601138340472887,-0.0010836000607251637,-0.00133069926054098,-0.0011189085552082614,-0.0012865847133961726,-0.0012601138340472887,-0.0013659876721881928,-0.0011718659151238766,-0.001189516933513321,-0.0011012546667928812,-0.0012777612662162523,-0.0010306319360244742,-0.0012424656…	none	0.604	38.321	620
2559504	2	1	1	2	24.9,24.92,24.93	16.0391	940.08	24.93	1233,1232,1240,1237,1240,1239,1243,1242,1238,1240,1237,1240,1236,1243,1239,1242,1236,1238,1237,1239,1237,1239,1235,1245,1238,1236,1243,1238,1239,1237,1244,1235,1244,1238,1243,1238,1244,1241,1240,1237,1244,1238,1246,1238,1240,1238,1243,1237,1242,1240,1240,1236,1241,1238,1246,1237,1244,1241,1244,1242,1242,1247,1240,1242,1238,1241,1238,1244,1239,1244,1240,1243,1237,1246,1242,1245,1246,1238,1247,1241…	0.00002473145121544578,-0.00009285869946891474,0.00008750030369942741,0.00003490306598878401,-0.000039355556318026136,-0.0000729793906078553,0.00003965681718795731,-0.000026476397551040077,-0.000005931915146980419,-0.000009764557864204674,0.00007308514272856856,0.0001559500467130213,0.000016658308009225837,0.00001553413402008234,0.000008992632672578103,0.00007288063124225724,-0.000020340933094904…	0.0071	0.00021	0.0001485344792006814,0.00012302518080841834,0.000010834203937232188,-0.000020083117404527327,0.000043798612019907616,0.000015587625609429172,-0.00007220201260209387,0.0000566783868436534,-0.0000934046682426493,-0.0000430757295906164,0.0000018417418458643496,-0.00004261502791740332,0.000015844536584703797,-0.00003402981959838322,-0.00009202163542645747,-0.00010668387008094899,-0.00011593022455282…	4929.51	1080	1236.33	0.781	140.22	18.8877,19.7373,20.63672	15.50879,15.67773,16.03906	-11514.2	11.673	18.69	-6.24	-6.24	18.69,21.95,23.35	0.22	9.63	1433,1434,1434,1434,1433,1429,1429,1429,1431,1436,1440,1438,1436,1438,1441,1441,1437,1438,1431,1411,1414,1413,1410,1410,1409,1402,1400,1401,1394,1393,1390,1394,1393,1390,1388,1389,1388,1389,1386,1388,1406,1409,1411,1416,1416,1416,1418,1420,1420,1426,1422,1422,1422,1424,1424,1424,1428,1426,1428,1427,1427,1428,1435,1436,1436,1429,1430,1430,1432,1433,1438,1434,1436,1437,1430,1436,1434,1433,1432,1438…	28.578	0.369	0.0001323205799715717,0.00010519852011876428,0.00008162491111422476,0.00006113549974522126,0.00004332677227513356,0.00002784800773709297,0.00001439437091624028,0.000002700908995388859,-0.000007462666364581045,-0.000016296514270100755,-0.00002397460648213955,-0.00003064815357589642,-0.00003644858284695419,-0.00004149012661009313,-0.00004587207186412257,-0.000049680715627110764,-0.00005299106444993…	6e-05	-0.000028974677555141846,0.000011607228993623997,0.00003368703719505579,0.00011970381523510508,-0.000016358913569958823,-0.000006055810685490348,0.00001434082594772252,-0.00004768717724910281,0.000051772142000981515,-0.00005735848547138826,-0.0000016401197614761917,0.000042308799163862414,0.00003074284830612339,0.000022541727949708223,-0.000009209805176092976,0.00003473826624215985,0.000011396867…	0.00007710017674401708,6.1030082945286654,611065.864364188,61183347698.03998,6126020538773081,613371596250075500000,6.141421053115025e+25,6.149135822759429e+30,6.156860283592501e+35,6.164594447788445e+40,6.172338327536193e+45,6.180091935040454e+50,6.187855282520976e+55,6.195628382213336e+60,6.203411246367566e+65,6.211203887250078e+70,6.219006317141962e+75,6.226818548340566e+80,6.234640593157504e+…	0.0001323205799715717,0.00010519852011876428,0.00008162491111422476,0.00006113549974522126,0.00004332677227513356,0.00002784800773709297,0.00001439437091624028,0.000002700908995388859,-0.000007462666364581045,-0.000016296514270100755,-0.00002397460648213955,-0.00003064815357589642,-0.00003644858284695419,-0.00004149012661009313,-0.00004587207186412257,-0.000049680715627110764,-0.00005299106444993…	0.749	0.183	0.068	1	0.905	1.335	-0.504	0.169	0.0001500801680259506,0.00026267433930956895,0.00013131731048935614,0.00018760831511377093,0.000056273985424160845,0.00026267433930956895,0.000018757184959951042,0.0003189823734316843,0.00008441371277406927,0.00020637360480505788,0.00011255526353098253,0.000056273985424160845,0.000028136081244855647,0.00006565369195465138,0.00020637360480505788,0.00026267433930956895,0.0002532903766919699,0.00009…	none	0.838	36.41	620
2559522	3	1	9	3	29.88,29.9,29.91	19	940.078	29.91	1468,1475,1474,1477,1472,1478,1476,1478,1473,1474,1474,1475,1471,1476,1478,1469,1478,1472,1470,1474,1474,1468,1472,1470,1470,1472,1468,1474,1472,1470,1474,1467,1469,1473,1470,1470,1470,1470,1470,1470,1472,1467,1470,1466,1472,1469,1464,1473,1472,1466,1472,1468,1466,1469,1465,1469,1467,1472,1465,1473,1466,1467,1472,1470,1462,1470,1466,1468,1470,1467,1466,1469,1468,1473,1465,1469,1468,1464,1470,1470…	0.000008192204389961838,0.000003957945769324022,0.000025036496502169377,0.00008754052531399842,-0.00006626389417361434,-0.0000014726161733853795,0.000035711873125974256,0.000045283868672028616,0.00010778524011530038,0.000006902492620032178,0.0000832039602067188,0.00005595749353010876,0.0001046483085083101,0.0000704978988281908,0.00011228477081102025,0.00015637566856632686,0.000039387082049625396,…	0.0189	0.00066	0.0002709783258123189,0.00014246106386299205,0.00009680791622841543,0.0000672652048977216,-0.00003358213203389451,0.000015089550944349866,-0.00005124449609823256,-0.00011756619300750338,0.000013892711308865882,-0.00013062276743416832,-0.00016014274871459838,-0.00018276279697108567,-0.0001639998255762374,-0.00013144173529508262,-0.00027129754906741555,-0.0002548363312242662,-0.0002567627400485529,…	4650.12	1011	1475.33	0.783	52.912	25.58105,26.11133,26.40625	18.20996,18.58691,19	0.0008	20.731	17.89	-12.02	-12.02	17.89,19.79,21.21	0.47	23.41	1658,1661,1664,1669,1676,1677,1679,1678,1678,1681,1678,1681,1676,1674,1673,1676,1678,1677,1685,1596,1585,1563,1551,1539,1530,1526,1518,1507,1502,1499,1491,1486,1479,1476,1472,1468,1466,1463,1462,1478,1529,1546,1557,1566,1572,1583,1584,1594,1598,1602,1606,1610,1616,1616,1620,1622,1624,1629,1630,1630,1634,1640,1638,1641,1643,1643,1644,1646,1649,1649,1652,1654,1654,1654,1660,1658,1658,1663,1662,1661…	76.164	0.356	0.00021452298137253877,0.00018033398043865037,0.000147906960124358,0.00011715111415808264,0.00008798031610346316,0.00006031287817714274,0.0000340713224962362,0.000009182164114894358,-0.000014424294757597097,-0.000036814159933447484,-0.0000580501303642742,-0.00007819167371869137,-0.00009729519291124851,-0.00011541418404905317,-0.0001325993862383833,-0.00014889892367079367,-0.00016435844038660503,-…	4.15201	0.000031091715591720005,0.000049124764659759454,-0.000014727021726722245,0.000027387496207906992,0.00006790027310780422,-0.000007192571745696157,0.00006543052415797366,0.00007061863622003746,-0.000022134380973805317,0.00002800711553512971,-0.0000037327510083001942,0.00004319945791505019,0.00001306405610536758,0.000010223862137109257,-0.00004077902819989015,0.00003986600608079599,-0.00004324795251…	0.000004194048078609569,6.991235155240361e-7,-0.0000027957981050263925,-0.000006290716783929895,-0.000009785632521186471,-0.000013280545316796122,-0.000016775455169870668,-0.000020270362082186466,-0.00002376526605196716,-0.000027260167080100928,-0.00003075506516658777,-0.000034249960311427685,-0.000037744852513732496,-0.00004123974177527856,-0.00004473462809428952,-0.000048229511470765374,-0.0000…	0.00021452298137253877,0.00018033398043865037,0.000147906960124358,0.00011715111415808264,0.00008798031610346316,0.00006031287817714274,0.0000340713224962362,0.000009182164114894358,-0.000014424294757597097,-0.000036814159933447484,-0.0000580501303642742,-0.00007819167371869137,-0.00009729519291124851,-0.00011541418404905317,-0.0001325993862383833,-0.00014889892367079367,-0.00016435844038660503,-…	0.683	0.234	0.083	1	0.278	0.463	-0.409	0.946	0.00019971319099189227,0.00012707958595522078,0.00018155365086243905,0.00015431576431558663,0.00016339487002217385,0.0003450168540606632,0.00041768692022529984,0.00022695392499225947,0.00009984511556701566,0.00037226670391448817,0.00012707958595522078,0.00012707958595522078,0.00038135036716664,0.00041768692022529984,0.00046311188725692656,0.000254196367750604,0.00022695392499225947,0.000381350367…	none	0.598	31.235	620
2559521	3	1	8	3	29.71,29.73,29.75	17.8154	940.049	29.75	1709,1707,1718,1714,1718,1724,1717,1725,1717,1724,1724,1722,1726,1722,1729,1721,1722,1729,1722,1730,1730,1722,1727,1726,1724,1732,1726,1727,1734,1730,1723,1730,1724,1730,1723,1729,1723,1728,1724,1732,1725,1728,1731,1730,1726,1732,1729,1733,1734,1729,1734,1726,1733,1728,1734,1728,1730,1731,1730,1736,1730,1737,1730,1737,1733,1739,1736,1730,1739,1730,1734,1738,1735,1736,1733,1736,1736,1731,1741,1737…	0.000006065288811172501,-0.00003619318070210006,-0.00013712256709205573,0.000024622719701320254,-0.00005116782106481599,0.00003233479050644198,0.00008510140590014493,0.000009305551930343652,0.00021021335583229682,0.00022664523670642246,0.00008095455952622894,0.000016345670717877434,0.00011660891647618688,0.0000939132577140843,0.00016903082094353375,0.0001826644291301159,0.00026617582096580755,0.0…	0.054	0.00164	0.00031511359181916665,0.00017782372116288122,0.00016630594697939648,0.00021626204752613236,0.00006784579315840245,0.0000647151926549663,0.0000224823316466015,-0.00010909615939897266,-0.00010942776281754984,0.000007511892777436953,-0.00004587692935899548,-0.00016625117675159745,-0.00023356375347832842,-0.0002366819436532161,-0.00021189380167655565,-0.00031267242218731696,-0.0003241567643445035,-0…	4855.12	1101	1713	0.773	18.535	25.38867,25.27832,25.2041	18.26367,18.11816,17.81543	58.6773	23.131	18.65	-11.1	-11.1	18.65,20.25,21.15	0.55	16.22	2198,2205,2203,2209,2210,2218,2222,2226,2226,2228,2230,2228,2226,2233,2238,2230,2230,2230,2240,2150,2148,2131,2112,2098,2085,2068,2054,2038,2030,2014,2005,1992,1988,1974,1961,1954,1954,1942,1937,1930,1982,2003,2016,2029,2038,2050,2061,2070,2074,2083,2094,2098,2107,2111,2118,2122,2129,2135,2141,2147,2152,2154,2158,2165,2169,2172,2174,2179,2182,2185,2189,2192,2193,2196,2198,2204,2204,2206,2210,2212…	55.699	0.431	0.00027291374345738946,0.00024288599714823115,0.00021340968689918978,0.0001844746860185961,0.00015607105378354774,0.00012818903202473845,0.00010081904177400422,0.00007395167997343481,0.000047577716244918446,0.000021688089719014078,-0.0000037260940779430384,-0.00002867356627957174,-0.0000531628976790531,-0.00007720250167366069,-0.00010080063715521125,-0.00012396541134743677,-0.00014670478259125124…	0.00024	0.000030176221854878358,0.000024200984913622297,-0.0000768075084764687,0.00008036982105494372,-0.00003490664237885213,0.00010010399194257748,0.00003867960747027341,0.000046961488367275256,-0.00001920701462686771,0.00004293133089307606,5.227155088576049e-7,0.00004206948779758647,0.00000916502120190321,0.000026950697207887484,0.000024143696822951268,0.0000815350447413232,0.000015361685804925826,-0.…	0.00004086378266148776,0.000027036108582866958,0.000013996459617466244,0.0000016999270137822774,-0.000009895838675514073,-0.000020830773445725545,-0.00003114253738031015,-0.00004086664435278762,-0.00005003658433706579,-0.000058683938747425626,-0.00006683848920539741,-0.00007452832010812328,-0.00008177991535145268,-0.00008861824954088683,-0.000095066874004504,-0.00010114799790409559,-0.00010688256…	0.00027291374345738946,0.00024288599714823115,0.00021340968689918978,0.0001844746860185961,0.00015607105378354774,0.00012818903202473845,0.00010081904177400422,0.00007395167997343481,0.000047577716244918446,0.000021688089719014078,-0.0000037260940779430384,-0.00002867356627957174,-0.0000531628976790531,-0.00007720250167366069,-0.00010080063715521125,-0.00012396541134743677,-0.00014670478259125124…	0.647	0.247	0.106	1	-1.094	-0.1	1.538	-0.439	0.0005475995304693188,0.0004950840244213286,0.0005826133960829793,0.000503836167784951,0.00032007818634110596,0.0006701604123052486,0.0006701604123052486,0.00032007818634110596,0.0005475995304693188,0.000267590183629948,0.00039007205923577074,0.0006176300848262406,0.00037257253341884316,0.000503836167784951,0.0004425748678552315,0.00039007205923577074,0.0005651061104133361,0.0004950840244213286,0…	none	0.538	36.313	620
2559520	3	1	7	3	29.54,29.55,29.56	20.1025	940.058	29.56	1534,1529,1539,1534,1538,1534,1537,1532,1534,1532,1538,1533,1538,1532,1537,1533,1538,1538,1533,1533,1534,1534,1543,1534,1533,1537,1534,1537,1534,1540,1538,1533,1536,1534,1542,1537,1531,1539,1534,1540,1536,1531,1538,1534,1540,1540,1534,1536,1534,1538,1533,1542,1538,1537,1538,1534,1540,1533,1539,1533,1538,1534,1542,1536,1539,1536,1540,1534,1542,1536,1542,1538,1538,1542,1538,1541,1538,1540,1536,1545…	0.00010081961366267251,-0.000013738190691981594,0.00002754540509180918,-0.000030333879621216874,0.00013279344010885263,0.00008056750918206744,0.0000595161856218691,0.00007813463824753831,0.00009958719029326101,0.000033201352325536844,0.00006881864090758241,0.00013560924203960656,0.000006889731259591377,0.0000651700238968848,0.00005262088126594892,0.00009390460498645664,0.00018620086021592442,0.00…	0.0152	0.00049	0.00011615598644556148,0.00012343958691533673,0.000042893891839456734,0.000050176865110018916,-0.000030352844158481513,-0.000025902887062961033,-0.000055440204987489234,-0.00012462021288337386,-0.00023908459453873005,-0.00022614202795919624,-0.00010277577111233734,-0.0001294740398037196,-0.0002467631483603251,-0.00017437055665565462,-0.0002576787153202129,-0.00013999014333032427,-0.00025161035704…	4919.24	1092	1534	0.778	65.994	25.10645,25.5127,25.93164	20.12598,20.11328,20.10254	55.6154	17.698	17.79	-11.77	-11.77	17.79,19.29,20.39	0.43	27.42	1680,1687,1686,1690,1689,1690,1691,1700,1700,1703,1701,1697,1700,1700,1693,1700,1700,1701,1703,1623,1621,1603,1592,1584,1574,1568,1565,1565,1560,1558,1558,1555,1552,1549,1545,1545,1544,1541,1541,1550,1590,1606,1618,1623,1628,1636,1640,1641,1650,1650,1654,1654,1657,1659,1662,1665,1665,1666,1669,1674,1671,1674,1674,1678,1679,1682,1683,1680,1680,1682,1686,1686,1684,1685,1686,1688,1686,1686,1688,1689…	88.577	0.392	0.00014152694509144613,0.00010993999563768501,0.00008037030511306471,0.00005268904393265962,0.000026775610043325792,0.0000025171034832196636,-0.00002019216550212073,-0.000041451136930173926,-0.00006135243214449947,-0.00007998275734852589,-0.00009742328136818544,-0.00011374998928923583,-0.0001290340135099996,-0.00014334194365185672,-0.00015673611667771131,-0.00016927488848242508,-0.000181012888138…	0.00016	0.00004963105466077124,0.00006978683107869913,-0.0000073596442041018875,-0.000010293234464964282,0.00007747746269692719,-0.000007915344083970051,0.0000567654415280526,0.00001919857453666146,-0.000006822028595352025,0.000019927450611641958,-0.000025880882213809648,-0.000004079697738212598,-0.00002680094470135033,0.0000015962678210277436,-0.000017827325438804,-0.0000751728264561467,-0.0000088535508…	0.00003735281880655044,0.000028522442778146026,0.000020169764841751432,0.000012268942896602686,0.000004795532825689695,-0.000002273587131167154,-0.000008960287913040193,-0.00001528525730373958,-0.00002126806393712957,-0.000026927217839940376,-0.0000322802276993869,-0.000037343655032773165,-0.00004213316542667592,-0.00004666357700423508,-0.00005094890627050218,-0.000055002411477686776,-0.000058836…	0.00014152694509144613,0.00010993999563768501,0.00008037030511306471,0.00005268904393265962,0.000026775610043325792,0.0000025171034832196636,-0.00002019216550212073,-0.000041451136930173926,-0.00006135243214449947,-0.00007998275734852589,-0.00009742328136818544,-0.00011374998928923583,-0.0001290340135099996,-0.00014334194365185672,-0.00015673611667771131,-0.00016927488848242508,-0.000181012888138…	0.688	0.224	0.088	1	0.79	0.206	0.315	0.48	0.0005476141637253539,0.00040151619105839885,0.0003923866994213714,0.0005202170499079676,0.0001459629411389867,0.00029197495576189174,0.00037412829187212455,0.00036499937594371395,0.00034674211973916567,0.0005110850626941861,0.00016421175858402127,0.0005202170499079676,0.0002737207690999434,0.0004380360768774197,0.0005476141637253539,0.00036499937594371395,0.0003193576744416552,0.0004654280067019…	none	0.63	36.793	620
2559519	3	1	6	3	29.31,29.33,29.34	20.9414	940.077	29.34	1445,1445,1441,1444,1441,1445,1443,1450,1443,1452,1446,1443,1447,1440,1448,1440,1449,1442,1446,1443,1447,1441,1444,1440,1447,1447,1440,1448,1441,1447,1441,1451,1444,1448,1442,1451,1450,1441,1448,1441,1448,1442,1447,1450,1445,1444,1449,1449,1443,1449,1441,1451,1448,1453,1448,1447,1447,1443,1448,1442,1449,1445,1445,1443,1449,1443,1449,1444,1450,1445,1451,1445,1448,1445,1452,1446,1449,1445,1453,1448…	0.00004528650105860059,-0.000029132585791227417,-0.000007842440816250092,0.00007634728829753036,0.00007302626497425085,0.00005056192090134111,0.000025364710606052167,-0.000005299107489499426,0.00010076530521097526,0.00007283072768400673,0.00009138798343568988,0.00007165865258235947,0.0001421787855748664,0.000067752048372297,0.00006716609415028697,0.00009666077816374617,0.0000714632081817556,0.000…	0.0096	0.00045	0.00017577288311755216,0.00008493976381689959,-0.000027742458591773523,-9.896498251082297e-7,0.000042168358410783975,-0.00009509782634335174,-0.00015307396673505463,-0.00006073353244717201,-0.00015970553219343993,-0.00016575378859466045,-0.00019639404339539434,-0.00027893953581902264,-0.0002713255098655165,-0.00021453497419979384,-0.0001522732305817135,-0.00027307015320546306,-0.00031189408470755…	4909.05	1041	1443.33	0.788	103.723	25.88281,26.00586,26.14062	21.0127,20.97656,20.94141	166.953	21.711	18.25	-11.09	-11.09	18.25,19.75,20.91	0.26	29.93	1562,1566,1565,1568,1568,1569,1569,1573,1576,1577,1582,1581,1579,1583,1581,1580,1581,1578,1573,1509,1502,1484,1481,1475,1466,1457,1454,1444,1438,1436,1430,1422,1421,1422,1419,1421,1422,1424,1415,1429,1469,1485,1497,1505,1511,1517,1521,1525,1525,1529,1533,1539,1539,1540,1542,1544,1547,1550,1548,1551,1553,1552,1557,1555,1557,1557,1558,1560,1557,1559,1559,1564,1563,1561,1563,1565,1564,1567,1565,1564…	94.205	0.313	0.00015881349945998455,0.00011496222493550292,0.00007543141476577038,0.00003979539347286602,0.000007670425425520427,-0.00002128941730104286,-0.000047395979944506064,-0.00007093038306582952,-0.00009214604971030988,-0.00011127143431638467,-0.00012851248275760563,-0.00014405485000799342,-0.00015806589931102643,-0.0001706965043797056,-0.00018208267403413753,-0.00019234701677105,-0.0002016000610360104…	0.00013	0.000019695562291314594,-0.000005326866078817517,0.00005513973645096765,0.00003179156808551232,0.00007549827556351519,-0.00004507008044798144,0.000037182555743245156,0.000007130514637391944,0.00002401356602550657,-0.00003955930105614853,-0.000007593008190734309,0.000027728170935779365,-0.00003081705040102253,0.000048085389400051617,0.0000012705414003620322,0.0000013912258783710817,0.0000836524213…	0.00002593921867896652,0.000005626415719359805,-0.000011563082288131046,-0.000026109515999771452,-0.00003841928407065625,-0.00004883629713123316,-0.00005765158597171823,-0.00006511143236811673,-0.00007142424970908511,-0.00007676640565477205,-0.00008128714950123669,-0.00008511278191128421,-0.0000883501835057699,-0.00009108980089725061,-0.0000934081735898717,-0.0000953700723420862,-0.00009703030873…	0.00015881349945998455,0.00011496222493550292,0.00007543141476577038,0.00003979539347286602,0.000007670425425520427,-0.00002128941730104286,-0.000047395979944506064,-0.00007093038306582952,-0.00009214604971030988,-0.00011127143431638467,-0.00012851248275760563,-0.00014405485000799342,-0.00015806589931102643,-0.0001706965043797056,-0.00018208267403413753,-0.00019234701677105,-0.0002016000610360104…	0.706	0.224	0.07	1	0.361	0.206	-0.005	0.799	0.0004946991635166756,0.0002892839294961872,0.00027061463419388265,0.0001772801940196771,0.00040131655797854757,0.00024261219593349254,0.0005133780943771521,0.00024261219593349254,0.0003546327838519874,0.0002052784199845362,0.00021461156309779116,0.00019594547743946147,0.0003359606792056326,0.00027061463419388265,0.00012128915650209917,0.0004946991635166756,0.00013995203361993373,0.00043866719071…	none	0.646	37.667	620
2559518	3	1	5	3	29.06,29.08,29.1	21.584	940.138	29.1	1694,1704,1701,1704,1702,1706,1702,1709,1706,1709,1706,1702,1708,1701,1704,1702,1708,1700,1707,1708,1702,1706,1702,1708,1702,1706,1704,1705,1704,1706,1702,1701,1699,1704,1702,1702,1703,1698,1706,1697,1702,1697,1695,1697,1700,1694,1700,1692,1703,1697,1698,1696,1702,1694,1699,1695,1701,1697,1704,1699,1694,1698,1693,1700,1696,1699,1690,1699,1692,1700,1692,1699,1692,1698,1694,1694,1696,1691,1696,1689…	0.00002368509054726684,-0.0000019080300555701506,-0.000047763815923479927,-0.00004440180890431645,0.00008345824977397757,0.00007813140447774462,-0.000043000837221675534,0.00007326948526353711,0.00011427176737958394,0.0001552761928440076,0.00005439667661407358,0.00007802308777973272,0.00013060429840393788,0.00006447656516385508,0.00020392294720172704,0.00010304173346811051,0.00012377200967929525,0…	0.0187	0.00081	0.0002935699681537151,0.0001318793904848133,0.00018735021602344634,0.00015017568274261996,0.000029067758227227062,0.0000179569229026532,0.00003289244098169636,-0.00005923995570679884,-0.00018316739035843075,-0.00012195271396026436,-0.00012148441014333846,-0.0002945441965948307,-0.00025937308981531173,-0.0002589020701837218,-0.0002295139616230705,-0.00031578737479930064,-0.0002343565188323408,-0.0…	4385.54	1077	1703	0.754	53.459	26.36914,26.72656,27.16895	21.5332,21.4502,21.58398	98.966	19.181	17.85	-11.25	-11.25	17.85,20.19,21.51	0.27	23.53	2230,2235,2240,2245,2253,2254,2250,2246,2251,2253,2252,2261,2261,2260,2257,2262,2265,2263,2262,2169,2161,2138,2112,2099,2078,2061,2045,2032,2019,2006,1998,1984,1974,1965,1955,1949,1943,1936,1934,1944,2000,2026,2041,2056,2070,2082,2092,2102,2106,2114,2125,2130,2136,2141,2150,2158,2157,2162,2166,2172,2175,2179,2181,2182,2193,2193,2194,2195,2197,2202,2202,2202,2206,2208,2214,2213,2214,2222,2219,2223…	85.44	0.589	0.0002753248519088169,0.00023326451839670713,0.000193393657140519,0.0001555982940378343,0.00011977038796665387,0.00008580752194105507,0.00005361261034390202,0.00002309362139970466,-0.000005836685905702302,-0.00003326101121069896,-0.000059257749181530566,-0.00008390121360983983,-0.0001072618498446913,-0.0001294064361663352,-0.0001503982746773573,-0.00017029737225689266,-0.00018916061209517344,-0.0…	0.00017	0.00002771202967694244,0.000021753257977237964,-0.000006444429842885888,0.00007179261568175995,-0.00002312607376201706,0.000010627055760039996,-0.00002074661217694211,0.00004318964087463809,-0.000034250932411355,-0.000035443749023420964,0.00007456133111704278,-0.000021945753990281642,0.0001277841290355897,0.0000344425204573049,0.000011009798534634506,0.00007177276627984184,-9.070115802811476e-7,-…	-0.0000013749714490539345,-0.00001759395077853676,-0.00003228467314908895,-0.000045591140799388605,-0.00005764378714735826,-0.0000685607553320706,-0.00007844905628318069,-0.00008740561766957823,-0.00009551823400932478,-0.00010286642725409796,-0.00010952222628381237,-0.00011555087295222406,-0.00012101146160435936,-0.00012595751833448192,-0.0001304375256626341,-0.00013449539777276649,-0.00013817091…	0.0002753248519088169,0.00023326451839670713,0.000193393657140519,0.0001555982940378343,0.00011977038796665387,0.00008580752194105507,0.00005361261034390202,0.00002309362139970466,-0.000005836685905702302,-0.00003326101121069896,-0.000059257749181530566,-0.00008390121360983983,-0.0001072618498446913,-0.0001294064361663352,-0.0001503982746773573,-0.00017029737225689266,-0.00018916061209517344,-0.0…	0.612	0.244	0.144	1	0.544	0.632	0.119	0.25	0.00026226040888564014,0.00009614376204648314,0.00015733723980592852,0.00017482267440936585,0.00006992062513040418,0.0002097956557378735,0.00019230881303440128,0.000026218915250884862,0.00026226040888564014,0.00008740254047558364,0.0002097956557378735,0,0.00013985250916751928,0.00012236848243745108,0.00017482267440936585,0.00010488515955901641,0.00004369907149806956,0.00023602724006407345,0.00006…	none	0.513	37.09	620
2559517	3	1	4	3	28.78,28.8,28.81	22.418	940.08	28.81	1550,1556,1556,1559,1556,1558,1557,1560,1555,1562,1560,1562,1561,1558,1562,1564,1558,1560,1555,1558,1557,1561,1556,1560,1558,1559,1557,1561,1558,1560,1557,1561,1560,1562,1557,1559,1556,1558,1558,1557,1560,1560,1558,1560,1557,1558,1556,1557,1558,1558,1553,1558,1557,1558,1554,1559,1558,1558,1552,1560,1556,1558,1555,1559,1558,1556,1558,1556,1555,1558,1555,1558,1554,1557,1552,1557,1553,1556,1551,1557…	-0.000006619231979057391,0.00007042304922148022,0.00009230193760781673,0.000003853082423454603,-0.000021546650508118224,0.00005285862204672294,0.00008524187659377324,0.000030945829720392554,0.00017365469605340215,0.00006681525480454509,0.000041414180871430545,0.00020250479047428924,0.00009566588647562849,0.00013855172545035048,0.0001210265722860766,0.00008511937464065109,0.0002619667850854438,0.0…	0.0222	0.00094	0.00026802331798925525,0.00021371953148193972,0.0001147831019199489,0.00010251510142158188,0.000003612083594670442,-0.000003399337285008256,0.000023714106658994313,-0.00006991233648910596,-0.00021073930145559607,-0.00024397403870514192,-0.00011455033052557649,-0.0003025625158779247,-0.00017053804554052445,-0.00023525070045378409,-0.00032093023227363975,-0.0003751251781587916,-0.000358520666813015…	4933.43	1014	1557	0.794	45.078	27.75488,27.97656,28.11133	21.95605,22.1748,22.41797	113.802	28.583	21.11	-7.7	-7.7	21.11,21.95,22.39	0.62	24.99	1845,1848,1850,1858,1861,1862,1865,1870,1864,1868,1868,1862,1862,1866,1868,1865,1866,1869,1872,1782,1770,1750,1731,1718,1702,1686,1672,1665,1657,1645,1645,1629,1626,1618,1614,1609,1602,1593,1590,1602,1648,1668,1680,1694,1701,1710,1720,1730,1734,1745,1754,1759,1762,1769,1772,1778,1782,1788,1790,1793,1800,1801,1808,1813,1814,1817,1818,1827,1828,1829,1832,1833,1836,1838,1840,1842,1843,1846,1849,1848…	81.197	0.263	0.00026200639569269764,0.00022063886231935513,0.00018109468053815493,0.00014329348270912794,0.00010715844354671487,0.00007261612398385591,0.00003959632191805919,0.000008031929536120959,-0.000022141203072477715,-0.00005098439829067671,-0.00007855627560241656,-0.00010491287072797917,-0.00013010774950821544,-0.00015419211676911157,-0.0001772149203879465,-0.0001992229507725369,-0.000220260935955749,-…	0.00019	0.000048880111993227076,0.00008412118007332343,0.000023882280604349787,0.00004759807247477243,0.00001534587598692769,0.00004070743828405232,-0.000019526079203497438,-0.00004354453576321588,-0.00003299958265408768,0.000013757592867855294,-0.000020138544916542332,-0.000034281955560946646,0.0000338748468386987,0.00002466807011243958,-0.00004543960874249861,0.000029300411284538203,-0.0000161193577847…	0.00003384005562848336,0.000013705527435941661,-0.000004263222844310804,-0.000020299157908022612,-0.00003461018173310126,-0.00004738183502979169,-0.00005877970075376739,-0.00006895155086932326,-0.00007802926219519807,-0.00008613052617173787,-0.00009336037471632766,-0.00009981254194962306,-0.0001055706794472009,-0.00011070944077221973,-0.00011529544934992687,-0.00011938816223238915,-0.000123040640…	0.00026200639569269764,0.00022063886231935513,0.00018109468053815493,0.00014329348270912794,0.00010715844354671487,0.00007261612398385591,0.00003959632191805919,0.000008031929536120959,-0.000022141203072477715,-0.00005098439829067671,-0.00007855627560241656,-0.00010491287072797917,-0.00013010774950821544,-0.00015419211676911157,-0.0001772149203879465,-0.0001992229507725369,-0.000220260935955749,-…	0.684	0.25	0.066	1	0.411	0.248	0.202	0.551	0.00035677501874881016,0.0004027725067338902,0.00014524929941503147,0.000255597690430487,0.00018202898116997387,0.0002923867189914573,0.00023720434473156784,0.000255597690430487,0.0001912243883184769,0.0001544439278443636,0.00014524929941503147,0.00014524929941503147,0.0001268606265254878,0.0003291788642102902,0.00014524929941503147,0.00038437292692717484,0.00014524929941503147,0.0003107824019857…	none	0.561	35.372	620
2559516	3	1	3	3	28.47,28.49,28.51	22.0283	940.075	28.51	1238,1240,1246,1242,1248,1241,1247,1242,1248,1242,1246,1244,1250,1242,1246,1243,1246,1244,1246,1244,1249,1243,1248,1243,1247,1244,1248,1242,1249,1242,1246,1244,1246,1244,1246,1242,1246,1242,1245,1244,1246,1242,1249,1240,1248,1244,1244,1246,1242,1248,1244,1252,1246,1249,1248,1254,1247,1251,1242,1246,1244,1245,1246,1246,1245,1246,1248,1249,1244,1250,1243,1246,1243,1250,1246,1248,1244,1248,1243,1246…	0.000021862519869485285,-5.86892405786505e-8,-0.000019044045416681137,-0.00009670710725793027,0.00008090815057841434,0.00005898425713510855,0.000010651677927217257,0.00008850690942057378,-0.00003611911410180746,0.000029988759217920863,0.000005134861498090367,8.215652673228653e-7,0.00006399805915558849,0.00012718243826078497,0.000014289145770897201,0.00010387735230521898,0.00011130115595930536,0.0…	0.0088	0.00041	0.0002760196681808955,0.00007212015913727757,0.00006193746852236927,0.000051755227132080886,-0.00006697268286784461,0.000019656464858570202,-0.00006679530347336978,-0.00012683352808162183,-0.00010768069769284375,-0.00010612515270749031,-0.00006350742258635056,-0.00008541664597983786,-0.00011025709868520637,-0.00014096073648675906,-0.00015993220203036601,-0.0002140876975344859,-0.00024771370949300…	4343.77	890	1242.67	0.795	113.491	31.26465,31.2168,31.19336	22.47363,22.29395,22.02832	-6779.68	24.298	18.89	-9.62	-9.62	18.89,20.49,21.51	1.1	20.7	1374,1377,1381,1380,1380,1382,1382,1392,1393,1392,1390,1388,1392,1385,1386,1385,1389,1390,1386,1331,1333,1326,1318,1310,1306,1300,1296,1289,1292,1286,1283,1279,1281,1272,1277,1274,1268,1270,1266,1270,1302,1314,1326,1334,1334,1342,1340,1344,1350,1350,1352,1354,1358,1359,1361,1363,1365,1365,1366,1366,1366,1369,1370,1370,1372,1374,1372,1375,1374,1376,1378,1378,1376,1382,1378,1379,1377,1379,1381,1381…	64.44	0.258	0.00020344402727080202,0.00015950011770576332,0.0001202708647716384,0.00008525044212372019,0.000053987292542506275,0.000026078305504754026,0.0000011636194316184273,-0.00002107801840651674,-0.00004093339415841795,-0.000058658525244458556,-0.00007448196147367414,-0.00008860773199038648,-0.00010121797604865259,-0.00011247529153603783,-0.00012252483152883862,-0.00013149617591197101,-0.000139505002196…	6e-05	0.000014882239440920102,-0.000008972227940550244,0.000005133229430645167,-0.000013544523199435361,-0.00004429848134192868,0.00009059512597175227,-0.000021265530740808077,0.000020446934365120625,-0.000018936267847425533,-0.000004831195821317321,-0.000011430859597179702,0.00001130174156585419,0.000028858827028081598,0.00001880761470208133,1.2940732016803094e-7,-0.00002544933913398901,0.000035243302…	0.000048537776333827776,0.05606177364579653,49.335722431729536,43404.8911885613,38187015.55479594,33596401616.06891,29557643747469.652,26004401122662964,22878308011484830000,2.0128015061735635e+22,1.7708345832309006e+25,1.557955472284939e+28,1.3706674110656609e+31,1.2058939970871153e+34,1.0609286545159476e+37,9.333901758296218e+39,8.211836079898592e+42,7.224658406457776e+45,6.356153311165999e+48,…	0.00020344402727080202,0.00015950011770576332,0.0001202708647716384,0.00008525044212372019,0.000053987292542506275,0.000026078305504754026,0.0000011636194316184273,-0.00002107801840651674,-0.00004093339415841795,-0.000058658525244458556,-0.00007448196147367414,-0.00008860773199038648,-0.00010121797604865259,-0.00011247529153603783,-0.00012252483152883862,-0.00013149617591197101,-0.000139505002196…	0.714	0.227	0.059	1	0.265	0.386	-0.452	1.066	0.0003155549850459703,0.0005164821456335073,0.0003442531743693636,0.0003155549850459703,0.000114720740801773,0.0003442531743693636,0.00019121807366996376,0.00022947179358405058,0.00007647712666086542,0.00036338635418179093,0.00023903575006712467,0.00023903575006712467,0.0003155549850459703,0.0003442531743693636,0.0003059893433398327,0.00022947179358405058,0.00022947179358405058,0.0004016552427735…	none	0.643	35.859	620
2559515	3	1	2	3	28.24,28.25,28.27	23.1406	940.118	28.27	1430,1438,1432,1438,1432,1434,1434,1437,1435,1440,1436,1437,1438,1435,1440,1430,1434,1434,1436,1430,1434,1434,1428,1432,1430,1432,1427,1432,1430,1429,1430,1426,1430,1426,1430,1426,1430,1426,1432,1422,1427,1425,1429,1429,1428,1426,1428,1426,1428,1427,1428,1429,1425,1430,1422,1429,1422,1425,1422,1426,1421,1426,1420,1426,1425,1428,1426,1422,1428,1420,1427,1420,1427,1422,1425,1422,1425,1422,1425,1423…	0.0000093682134467416,-0.00001792619559844002,0.00007391605923157906,-0.00002648666872787966,0.0000030757137255840328,0.00007596469669205366,0.0000026370680718395926,0.000048446896580808406,0.00005635053985543329,0.00007237773615655045,0.00002612711696491122,0.000020492614771645778,-0.000025751652441281067,-0.00002055638628371333,0.00017960348758191998,0.00006293608019673907,0.0000410554188957332…	0.0051	0.0003	0.0001620312679159892,0.00007244857502451801,0.000072228839767049,-0.000001090996278792149,-0.00002838109206009726,-0.00016392815380307122,-0.000058594878943954886,-0.00011835846362547893,-0.00010233845669743884,-0.00010255709367816564,-0.00010818857648605463,-0.00005427599134891625,-0.00012215742722266338,-0.00013320089053009065,-0.00015236223264386418,-0.00014716841022766313,-0.0001392684729608…	4658.13	1020	1436	0.781	197.576	28.55664,28.96289,29.16016	23.57422,23.36914,23.14062	503.618	25.805	17.39	-10.88	-10.88	17.39,18.73,19.99	0.46	24.92	1606,1608,1607,1612,1616,1620,1620,1622,1623,1622,1625,1624,1624,1622,1622,1616,1619,1618,1621,1554,1546,1526,1522,1510,1501,1494,1493,1490,1484,1481,1479,1477,1474,1473,1467,1466,1461,1466,1463,1474,1514,1530,1542,1553,1559,1563,1570,1574,1576,1580,1582,1585,1586,1587,1590,1594,1595,1595,1596,1596,1597,1598,1600,1601,1604,1605,1605,1604,1604,1606,1609,1606,1610,1609,1610,1612,1610,1609,1614,1614…	80.025	0.368	0.00016553943202939734,0.00011160455199760337,0.00006733924570225441,0.000031009928936072515,0.0000011938185969408838,-0.0000232767884743934,-0.000043360246833941285,-0.000059843094950618605,-0.00007337085880351562,-0.00008447333293688987,-0.00009358532906741417,-0.00010106370483170486,-0.00010720133957943957,-0.0001122386045530021,-0.00011637277666600461,-0.00011976576455717764,-0.00012255044949…	0.00013	0.000027908133645191777,-0.00004660995208745801,0.000036850123359864175,-0.000058839649309986946,0.00003764816878854739,0.000021759458027412926,-0.000021815348105399446,0.00000789906388470948,-0.00005195918234845292,-0.000012475319358643961,-0.000046275728390868264,0.000020896110030989648,0.00002292386321702752,-0.00006136316564271297,-0.000013737425910663865,-0.000041023659749372616,-0.000009682…	0.00005700462995845252,0.000005273613949838751,-0.000025989515479680403,-0.00004488307947935368,-0.000056301218581982865,-0.00006320165835974233,-0.00006737187109743097,-0.00006989209804494117,-0.00007141517234989303,-0.0000723356272877693,-0.00007289189515330038,-0.00007322807015273757,-0.00007343123419878344,-0.00007355401438670588,-0.00007362821538259896,-0.00007367305802280571,-0.000073700158…	0.00016553943202939734,0.00011160455199760337,0.00006733924570225441,0.000031009928936072515,0.0000011938185969408838,-0.0000232767884743934,-0.000043360246833941285,-0.000059843094950618605,-0.00007337085880351562,-0.00008447333293688987,-0.00009358532906741417,-0.00010106370483170486,-0.00010720133957943957,-0.0001122386045530021,-0.00011637277666600461,-0.00011976576455717764,-0.00012255044949…	0.692	0.225	0.083	1	0.604	0.564	-0.01	0.446	0.0002948213778548358,0.00043959223861563234,0.0002224540405654193,0.00034005708799013894,0.00015009875997763457,0.00034910479544986357,0.0002134089712234417,0.00034910479544986357,0.0002948213778548358,0.0002948213778548358,0.0002224540405654193,0.0002948213778548358,0.00016818645002848585,0.00036720077586468287,0.0003038681429530035,0.00015009875997763457,0.0002767284129969574,0.000150098759977…	none	0.629	34.542	620
2559514	3	1	1	3	28.02,28.05,28.07	23.8428	940.137	28.07	1294,1292,1292,1290,1296,1292,1297,1299,1293,1292,1297,1290,1298,1292,1296,1290,1298,1293,1297,1291,1295,1294,1296,1299,1295,1292,1297,1294,1294,1296,1294,1293,1298,1290,1297,1291,1294,1299,1292,1290,1292,1297,1294,1292,1291,1297,1290,1296,1300,1298,1295,1294,1294,1293,1294,1295,1298,1293,1297,1291,1296,1294,1295,1292,1298,1292,1298,1292,1291,1292,1298,1294,1296,1294,1292,1293,1298,1297,1298,1296…	0.0001300170826307647,-0.00005581618409684015,0.00006957294962961173,0.0000846623671924739,0.0000879319182141386,-0.000003348284665366252,0.00007871122866533774,0.000007129855417230985,0.00010100987616084752,0.00007276044048483822,0.00000905985278802793,0.00005960109433268409,0.000043173213627576717,0.00008977763903720596,0.00006940908285019295,0.000033284786808719884,0.000024736666339746426,0.00…	0.0068	0.00038	0.00018752397213852776,0.000033204503444284805,0.00001677905635545888,0.000031864765658414097,-0.00007120423576118537,-0.00010731306174900914,-0.0000882933365319115,-0.00013227478481727748,-0.0001801879932762031,-0.0002950087387983283,-0.00009096825985133469,-0.0001152617511685808,-0.00020254267386601643,-0.00016778040053562457,-0.0002707927824770374,-0.00014549522518582627,-0.0002091497098755462…	4510.79	1015	1291.33	0.775	146.105	28.95996,29.47559,30.05371	23.84082,23.86621,23.84277	-136.073	12.527	18.29	-9.78	-9.78	18.29,19.59,20.55	0.83	25.6	1468,1480,1478,1480,1479,1480,1477,1472,1478,1476,1474,1477,1486,1483,1483,1483,1481,1482,1482,1424,1421,1410,1402,1398,1394,1392,1387,1384,1382,1378,1377,1375,1374,1383,1378,1380,1379,1376,1374,1383,1420,1429,1437,1442,1446,1448,1449,1452,1454,1450,1456,1452,1454,1454,1456,1458,1459,1460,1460,1461,1462,1458,1465,1466,1466,1462,1466,1466,1469,1466,1467,1468,1468,1470,1468,1468,1472,1470,1470,1470…	79.666	0.417	0.00016069896439382386,0.00010895154654901558,0.0000642382999118895,0.000025603049920704823,-0.000007780402504374567,-0.00003662594889198225,-0.00006155043949902732,-0.00008308687440211399,-0.00010169580148701843,-0.00011777516507758463,-0.00013166881581295445,-0.00014367386375339013,-0.0001540470319578607,-0.00016301014640206137,-0.00017075487963652436,-0.0001774468496260189,-0.00018322916142224…	6e-05	-0.00003041440459770246,-0.000023154818911977104,0.000022407364552729137,-0.00003648999186751032,-0.00005534307595976578,0.00003025972963275203,-0.00007912143798607615,0.00005522813044071174,0.000038112204582767485,0.000008809553131073462,-0.00005356725277693917,0.000049447168663611577,0.00002014380462082017,-0.000035271146681426474,0.000027700110870297222,-0.00001204750880649657,-0.0000361240907…	0.000041425523209748344,0.00004999294665221129,0.00005980920303948418,0.00007105632886532932,0.0000839428952254339,0.0000987078756412994,0.00011562507767859398,0.0001350082205416295,0.00015721675280486,0.00018266251816768668,0.00021181739284493128,0.00024522203622373106,0.00028349591706245493,0.0003273488011613921,0.00037759391353706567,0.00043516301918467465,0.0005011237020922155,0.0005766991629…	0.00016069896439382386,0.00010895154654901558,0.0000642382999118895,0.000025603049920704823,-0.000007780402504374567,-0.00003662594889198225,-0.00006155043949902732,-0.00008308687440211399,-0.00010169580148701843,-0.00011777516507758463,-0.00013166881581295445,-0.00014367386375339013,-0.0001540470319578607,-0.00016301014640206137,-0.00017075487963652436,-0.0001774468496260189,-0.00018322916142224…	0.714	0.202	0.084	1	0.918	0.129	0.442	0.429	0.0005521719918509413,0.000373672283402062,0.00036427959387685374,0.000477005277647824,0.000589760228147837,0.00038306517607163907,0.0004018515708795827,0.0002609734141227277,0.0002703638696384689,0.00041124507303530466,0.0002797545282020677,0.00041124507303530466,0.00030792772226776295,0.0006085555663414593,0.00036427959387685374,0.00041124507303530466,0.000373672283402062,0.0004018515708795827,…	none	0.724	45.752	620
2559532	4	1	10	4	31.16,31.18,31.18	18.249	940.059	31.18	1876,1883,1886,1882,1881,1877,1877,1884,1880,1880,1876,1873,1880,1877,1875,1872,1869,1877,1876,1869,1875,1877,1869,1875,1876,1875,1865,1869,1875,1877,1873,1875,1875,1870,1871,1865,1867,1869,1873,1870,1872,1863,1863,1863,1867,1865,1873,1869,1869,1861,1865,1867,1869,1868,1869,1865,1863,1864,1866,1863,1863,1865,1865,1869,1867,1869,1864,1864,1862,1865,1859,1862,1871,1865,1868,1861,1865,1872,1869,1870…	0.00001696394626377114,0.000011605325141375764,0.000042150092392015,0.00004127906006343761,0.0000763135032232284,0.00011135018920291702,0.00007905907609468802,-0.000020543138966805165,0.00012668964594465403,0.00010786338391466024,0.0001743238532438426,0.00002084857852059074,0.00010973684189968803,-0.00003473884571824677,-0.00007150222217698396,0.00013854097865787486,0.00012869203030096862,0.00006…	0.0088	0.00032	0.00014315829929609637,0.00006599001238530259,-0.00009191801622328931,-0.00013764430978847078,-0.00006225481798976413,0.00004455615584983748,-0.00020304110918327483,-0.0001097223330850967,-0.00015992975412662652,-0.00012043177612585919,-0.0001123301308647437,-0.00020738257546443014,-0.000239640361377311,-0.00021360336138861473,-0.00005749464451301115,-0.00020188687772116167,-0.0001848176212778480…	5310.67	1248	1883.67	0.765	113.553	23.94824,24.07227,24.31836	18.0293,18.0791,18.24902	248.024	17.406	19.69	-11.49	-11.49	19.69,21.25,22.29	0.21	26.84	2167,2173,2176,2177,2179,2180,2181,2187,2187,2187,2188,2187,2189,2187,2193,2191,2191,2193,2190,2085,2072,2048,2032,2016,2002,1993,1984,1982,1973,1962,1963,1954,1947,1941,1940,1934,1928,1925,1923,1953,2016,2044,2063,2073,2089,2101,2109,2111,2123,2128,2133,2137,2141,2145,2149,2155,2155,2158,2164,2164,2165,2168,2168,2173,2173,2176,2177,2178,2181,2179,2181,2181,2185,2186,2187,2191,2192,2192,2191,2190…	92.457	0.499	0.0000903831744789689,0.00005605289207505099,0.000025407734090819188,-0.0000019478727413386435,-0.000026367039565038732,-0.00004816497342270478,-0.00006762304600534623,-0.00008499242564947185,-0.000100497319463616,-0.00011433786743443491,-0.00012669272587002058,-0.00013772137352798837,-0.00014756617019625812,-0.00015635419429906408,-0.00016419888324834545,-0.00017120149771447202,-0.00017745242871…	6e-05	-0.000020096309235011298,-0.00005406637907250065,0.00004996350564980985,-0.00005646029671674425,-0.000030059447656571407,-0.000039880966755633654,0.000008946110249898653,-0.00007504613476867548,0.0000013765747032789691,-0.000011895617248778303,0.00003865950911891099,-0.00009190634326348488,0.00008112145855757108,-0.000020133940340832102,0.000004543714971690327,0.000024047354584177275,0.0000090495…	-0.000009874948603047743,-0.00002258302170139726,-0.000032499654266886506,-0.00004023801087515104,-0.00004627656908543167,-0.000050988704633695746,-0.00005466577797670194,-0.0000575351496726897,-0.000059774238524533086,-0.00006152149172754605,-0.00006288494532740016,-0.00006394890429782838,-0.00006477915528024234,-0.00006542703429903748,-0.00006593260096729308,-0.00006632711545014576,-0.000066634…	0.0000903831744789689,0.00005605289207505099,0.000025407734090819188,-0.0000019478727413386435,-0.000026367039565038732,-0.00004816497342270478,-0.00006762304600534623,-0.00008499242564947185,-0.000100497319463616,-0.00011433786743443491,-0.00012669272587002058,-0.00013772137352798837,-0.00014756617019625812,-0.00015635419429906408,-0.00016419888324834545,-0.00017120149771447202,-0.00017745242871…	0.645	0.237	0.118	1	1.378	0.495	0.086	0.419	0.00008863567260251731,0.00006093508162883767,-0.00008677157123729958,0.00013480725086687244,0.0003195426664318032,0.0004858717536424085,0.00037497861781909904,0.0004304216462869129,0.0005228424254876599,0.000652264567117753,0.0009759887590571561,0.0009019733809520136,0.0006800029017352813,0.000707743008109929,0.0008187211557079181,0.0009759887590571561,0.0010407625640995854,0.0008187211557079181…	none	0.559	50.079	620
2559531	4	1	9	4	31.07,31.09,31.09	17.9297	940.077	31.09	1855,1867,1867,1861,1871,1865,1865,1865,1865,1867,1863,1871,1867,1861,1865,1865,1860,1860,1869,1867,1857,1857,1867,1864,1861,1860,1861,1869,1864,1861,1856,1863,1867,1861,1857,1855,1857,1865,1861,1858,1865,1865,1866,1861,1865,1861,1853,1864,1864,1859,1859,1860,1861,1855,1859,1863,1861,1857,1858,1861,1859,1855,1857,1861,1861,1861,1855,1853,1861,1861,1853,1861,1860,1857,1856,1863,1857,1855,1855,1855…	0.00001360900820983155,0.00006859721210767224,0.000023826171800374964,0.00008237730274253144,0.00000910544712517991,-0.000028533103757943497,0.00010839173426548755,0.00005293066724239141,0.00008297814299036493,0.00008808627413551053,0.00009319434519996513,0.00008048843539261292,0.0001069731789359371,0.00012633284943883974,0.00012075180159565338,0.00006529422891211077,0.00014878222670934837,0.0000…	0.0056	0.00049	0.00025117062374849095,0.00011731463064342063,0.00007611072570736795,-0.000011389681780025162,-0.00012023405428934253,-0.00011868739012001572,-0.00008153467655872686,-0.00024019143027467933,-0.0001567703256700314,-0.00022285862916699892,-0.0001750360200061688,-0.00021976383117458593,-0.00015770276227452813,-0.0002273470850512076,-0.00024003641937203444,-0.00023137071542717107,-0.00030455842660703…	5353.25	1237	1865	0.769	179.919	24.55664,24.66699,24.83887	17.92871,17.90527,17.92969	-22.5372	16.721	20.91	-10.18	-10.18	20.91,23.05,24.13	0.41	28.95	2123,2129,2132,2138,2139,2137,2139,2141,2135,2148,2143,2147,2143,2141,2149,2145,2146,2149,2149,2036,2018,1988,1969,1950,1938,1924,1909,1902,1894,1884,1878,1875,1868,1865,1859,1854,1850,1848,1846,1875,1940,1967,1987,2005,2015,2025,2031,2041,2053,2060,2065,2071,2081,2081,2086,2093,2097,2103,2101,2107,2110,2119,2116,2123,2125,2131,2131,2132,2133,2133,2137,2137,2137,2139,2139,2141,2141,2145,2143,2141…	98.679	0.467	0.00024978829336065665,0.00016901848781436854,0.00010154837969155676,0.000045188017557279945,-0.000001891948790555954,-0.00004121964555078191,-0.00007407157499009375,-0.00010151404827973294,-0.00012443779592882483,-0.00014358687920324115,-0.00015958284093967463,-0.0001729448796444357,-0.0001841067016898629,-0.0001934305985986028,-0.00020121920633764352,-0.00020772532830642913,-0.00021316014085457…	0.00013	0.00001115211452896773,0.000053793701232405094,-0.000035806436850413654,0.00007736349103032505,0.00003889159129429721,0.000037450941437739095,0.00006246054193605598,-0.000025378015929178973,0.00007015952455914524,-0.00008467210880943881,-0.000038514182165116824,-0.000006456582094750216,-0.00008194133728396358,-0.000042835148968133374,0.0000227221690875589,-0.00004042686984471819,0.000026893954738…	0.000087387957058632,0.00009044538355997555,0.0000935724980814712,0.00009677088902439392,0.0001000421809944997,0.00010338803562723565,0.00010681015243175879,0.00011031026965419278,0.00011389016516056087,0.00011755165733984343,0.00012129660602761923,0.0001251269134507587,0.0001290445251936506,0.0001330514311864506,0.0001371496667158564,0.0001413413134589205,0.00014562850054042695,0.000150013405614…	0.00024978829336065665,0.00016901848781436854,0.00010154837969155676,0.000045188017557279945,-0.000001891948790555954,-0.00004121964555078191,-0.00007407157499009375,-0.00010151404827973294,-0.00012443779592882483,-0.00014358687920324115,-0.00015958284093967463,-0.0001729448796444357,-0.0001841067016898629,-0.0001934305985986028,-0.00020121920633764352,-0.00020772532830642913,-0.00021316014085457…	0.652	0.238	0.111	1.001	0.722	0.17	0.01	0.82	0.0006374374165628808,0.0004837524565290888,0.0005029601026216119,0.0007431273829241481,0.0004837524565290888,0.0006758671557175345,0.0007335181412535942,0.0006086173436504576,0.0005605881384320695,0.00040693036604385957,0.0007046916918661831,0.00044533971265976285,0.0005221685982528036,0.0005221685982528036,0.0005029601026216119,0.0005990110776682443,0.0008103980284968465,0.0007623465041337688,0…	none	0.562	45.733	620
2559530	4	1	8	4	30.99,31,31.01	18.5596	940.05	31.01	1691,1696,1695,1691,1690,1699,1695,1689,1693,1698,1697,1691,1687,1695,1693,1691,1689,1689,1690,1690,1687,1693,1693,1689,1685,1687,1692,1690,1684,1685,1689,1689,1684,1685,1685,1688,1689,1687,1683,1685,1681,1686,1686,1683,1681,1685,1688,1682,1690,1685,1680,1683,1690,1685,1682,1681,1684,1689,1684,1683,1677,1681,1683,1683,1683,1681,1682,1688,1685,1681,1685,1685,1681,1679,1685,1679,1683,1684,1680,1677…	0.000006259615731859884,0.0000922137509156676,0.00015455389024947433,0.00012238317709415965,-3.3855763736057365e-7,-0.000001003854431461423,0.00016370138076239713,0.0000685303126686546,-0.00001480923533216283,0.00007113570858526204,0.000023226209018676842,-0.000001058920082076729,0.00008882396772234162,0.00003303989318567897,0.000012691209088957016,0.0001340745257647331,0.00002317004733046917,-0.…	0.0097	0.00034	0.00010711840412140165,-0.000019519247531220924,0.0000703531883086844,0.00003819419045097344,-0.00006874292288117842,-0.00005760093924700606,-0.00009761920813240712,-0.00008254264518362142,-0.00024058866782402389,-0.0001783064471409176,-0.00006879491135274916,-0.00015602717187617344,-0.00024324060095508396,-0.00020849927560920723,-0.0002012946023580643,-0.00016261645260080078,-0.00027735955241999…	5128.39	1218	1694	0.762	103.53	24.27539,24.45996,24.73047	18.86328,18.75391,18.55957	369.853	16.049	21.85	-9.16	-9.16	21.85,22.67,23.11	0.42	30.71	1952,1953,1957,1951,1956,1957,1955,1959,1956,1963,1953,1963,1963,1967,1959,1963,1965,1969,1965,1867,1856,1830,1813,1808,1793,1787,1778,1769,1765,1761,1758,1752,1749,1745,1744,1738,1740,1738,1733,1763,1821,1841,1861,1876,1885,1894,1902,1909,1913,1917,1921,1929,1932,1933,1935,1938,1941,1944,1943,1945,1943,1949,1949,1952,1956,1953,1955,1956,1959,1961,1957,1961,1962,1954,1961,1960,1959,1960,1964,1962…	101.87	0.52	0.00010448603467024315,0.00007140385132095814,0.00004157533441455008,0.000014680482540902487,-0.000009569233245337123,-0.000031433964773737715,-0.000051148277676337075,-0.00006892366781624187,-0.00008495083022290952,-0.00009940170487533369,-0.00011243132128036864,-0.00012417946163489565,-0.00013477216041429574,-0.0001443230564748682,-0.00015293461217559827,-0.00016069921259805655,-0.0001677001566…	9e-05	0.0000061607909107858626,-0.000024799981430525273,0.000001738153600271555,0.000003634028275915043,0.00002360199818193612,0.000027140914061803543,-0.000039962378106447297,0.00008022493950534988,-0.000009886608517185424,-0.000007990784442295934,-0.000019237421818322343,-0.000028841011659719736,0.00008148993926562821,0.000014378491689640499,-0.000006725786156006514,0.000016527401248654805,0.00002828…	0.000029085659307039658,0.0000020621492108055983,-0.000016606658380316733,-0.00002950373857579129,-0.00003841350299200392,-0.00004456868701421879,-0.00004882090834999166,-0.000051758494979919196,-0.00005378788492153204,-0.000055189860098421036,-0.000056158394708901475,-0.00005682749306895951,-0.00005728973015433354,-0.000057609060070306656,-0.000057829664600886204,-0.00005798206610315046,-0.00005…	0.00010448603467024315,0.00007140385132095814,0.00004157533441455008,0.000014680482540902487,-0.000009569233245337123,-0.000031433964773737715,-0.000051148277676337075,-0.00006892366781624187,-0.00008495083022290952,-0.00009940170487533369,-0.00011243132128036864,-0.00012417946163489565,-0.00013477216041429574,-0.0001443230564748682,-0.00015293461217559827,-0.00016069921259805655,-0.0001677001566…	0.67	0.217	0.113	1	0.692	1.329	-0.773	0.443	0.0003388706475337632,0.0002417713005722148,0.0003035592822078947,0.000568464531197534,0.0006391332290840152,0.00023294516361764883,0.00017116722686863408,0.0003741848841691571,0.00028590467614023204,0.0002682507877247934,0.00019764240941969448,0.000091751361617054,0.00040950199258116726,0.0002682507877247934,0.00012704550888576377,0.00035652740690861047,0.0004448219732369281,0.000232945163617648…	none	0.631	47.03	620
2559529	4	1	7	4	30.83,30.84,30.86	20.9258	940.102	30.86	1588,1595,1596,1592,1593,1597,1600,1596,1590,1597,1602,1597,1593,1601,1601,1600,1597,1595,1599,1592,1597,1603,1594,1594,1602,1600,1595,1595,1603,1601,1597,1597,1606,1599,1599,1593,1597,1606,1605,1597,1595,1604,1605,1600,1597,1603,1601,1597,1599,1603,1605,1597,1603,1604,1597,1609,1605,1600,1602,1610,1605,1604,1601,1609,1605,1601,1602,1603,1606,1600,1601,1608,1609,1606,1602,1612,1605,1607,1603,1608…	-0.00006680396252009132,0.0001252864558035896,-0.000025106085037589874,-0.0001093787175061815,0.0000796812943141266,0.00007950296753931992,-0.000031820713844710255,0.00001005358071083296,0.00010901135474697778,0.00006376902700847351,0.00012968490518307612,0.00018358952210707297,0.000021181356692993392,0.00006305667745823141,0.0001620178471987579,-0.00003341155620102805,0.000032485569301937025,0.0…	0.0116	0.00053	0.00020901293801749726,0.00022085144274309215,0.00013054118823298334,0.000007216458776249703,-0.00003500200840418848,-0.00006520521465317411,-0.00005036869786062666,-0.00008957680739555442,-0.00010176160030479164,-0.0001349595618862641,-0.00012012528816006762,-0.00013831196590274666,-0.00023153177287753009,-0.000204695220327275,-0.000165851938704156,-0.0002800668393283661,-0.00023522851254459675,…	4843.31	1108	1594.33	0.771	86.026	24.89844,25.20605,25.42676	20.9248,20.9375,20.92578	-4105.93	22.476	17.19	-13.67	-13.67	17.19,19.33,20.81	0.66	28.03	1779,1783,1787,1786,1789,1791,1793,1791,1793,1793,1793,1793,1793,1794,1796,1797,1797,1795,1793,1706,1696,1678,1666,1652,1644,1633,1627,1618,1610,1606,1602,1597,1595,1590,1589,1583,1582,1580,1577,1605,1654,1679,1691,1704,1715,1724,1729,1738,1743,1747,1747,1753,1756,1760,1765,1763,1770,1770,1773,1778,1776,1776,1781,1781,1781,1783,1787,1783,1787,1788,1787,1788,1791,1790,1787,1793,1794,1794,1796,1793…	92.828	0.448	0.00022692193835619162,0.00018284930636976952,0.00014240955476516504,0.0001053032274111297,0.00007125555216408257,0.00004001440618194534,0.00001134844895592734,-0.000014954590764630485,-0.00003908948683966181,-0.0000612349580377036,-0.00008155499144736321,-0.00010020005680077933,-0.00011730822070113483,-0.00013300616900507057,-0.00014741014493073473,-0.00016062680983815425,-0.00017275403305600057…	0.00015	-0.00002912024114300335,0.00004199795375609906,-0.00002857037083439964,-0.000016489028478812852,-0.000017900743047876576,-0.0000024457290903841375,-0.000020724153057174153,0.00003183954906726317,0.0000068126802273841154,-0.000043511569863456774,-0.00004660970551803094,0.00003799982158088095,-0.00000895463510477134,-2.4625899519017657e-7,0.00003376408357305863,0.00002223132493474789,0.000002265247…	0.00010298491451364258,0.009183971446663004,0.5603936824461528,34.01844853413949,2064.8996397037768,125338.00774263582,7607931.892323985,461796295.4632604,28030721294.62963,1701445732709.7415,103276599661058.2,6268819411926584,380513077970420700,23096885233454694000,1.4019652368659112e+21,8.509833709237776e+22,5.165411228082101e+24,3.13536951094976e+26,1.9031479849559737e+28,1.1551978929414269e+30	0.00022692193835619162,0.00018284930636976952,0.00014240955476516504,0.0001053032274111297,0.00007125555216408257,0.00004001440618194534,0.00001134844895592734,-0.000014954590764630485,-0.00003908948683966181,-0.0000612349580377036,-0.00008155499144736321,-0.00010020005680077933,-0.00011730822070113483,-0.00013300616900507057,-0.00014741014493073473,-0.00016062680983815425,-0.00017275403305600057…	0.671	0.227	0.102	1	-0.244	-0.388	2.433	-1.045	0.0003775802775674316,0.00012644353237526563,0.0002659460171883377,0.0003403656689839061,0.0003403656689839061,0.0002287409728836393,0.00013574230405501573,0.00047063075290960086,0.00034966902217355074,0.00038688442800217715,0.00024734309662683047,0.00012644353237526563,0.0002287409728836393,0.00020083928115415288,0.00017293938188205944,0.00034966902217355074,0.0002845497346366201,0.0000799526602…	none	0.604	37.571	620
2559528	4	1	6	4	30.71,30.72,30.73	18.1582	940.091	30.73	1522,1531,1528,1524,1526,1529,1526,1532,1529,1524,1530,1525,1526,1532,1526,1524,1532,1529,1521,1524,1530,1525,1526,1528,1525,1528,1522,1529,1526,1524,1524,1529,1526,1524,1526,1522,1521,1529,1524,1520,1523,1526,1525,1524,1521,1530,1525,1522,1519,1528,1524,1520,1520,1526,1525,1518,1520,1526,1525,1520,1522,1526,1524,1518,1517,1528,1523,1522,1526,1523,1519,1524,1524,1524,1517,1523,1527,1521,1526,1522…	0.00012154197785349393,-0.000009088049092717235,0.00012379314331726113,0.000025647890347103136,0.00004662612070198911,-0.000015410897412940275,0.000041658797382401115,0.00008068587025536711,-0.000010228070194603723,0.00001435714196638959,0.000049771675237912515,-0.00006278531967460141,0.00003036721309553519,0.00003690698404525067,0.0000867607095910927,0.00011495963324850589,-0.0000481329157059632…	0.0065	0.00026	0.00012961164174882426,0.000042304224776743436,0.000023580274798461077,-0.00001679472871094402,-0.00004634059185298884,-0.00008310009841641689,-0.00008377783593222278,-0.000026724749042290718,-0.0001608927004006474,-0.000010038978778507499,-0.00010091982885133043,-0.00021702833589136179,-0.0001563865758185464,-0.00016067084449385721,-0.00008919936876656843,-0.0002594056486689644,-0.00010498507558…	4876.25	1066	1527.67	0.781	153.926	24.02832,24.34766,24.79297	17.17188,17.40332,18.1582	-71.7296	22.972	20.65	-10.08	-10.08	20.65,21.37,21.91	0.72	22.61	1703,1708,1710,1708,1710,1708,1705,1710,1707,1710,1710,1714,1714,1709,1709,1720,1717,1721,1720,1648,1652,1638,1624,1622,1614,1610,1604,1598,1592,1590,1586,1584,1582,1580,1581,1577,1574,1569,1563,1574,1614,1633,1641,1649,1654,1661,1662,1666,1666,1670,1673,1676,1677,1680,1681,1684,1686,1688,1686,1689,1690,1690,1692,1692,1693,1696,1696,1697,1700,1700,1701,1701,1702,1701,1701,1703,1702,1705,1704,1703…	73.126	0.365	0.0001172242328190625,0.00007945009895552648,0.00004706499250880779,0.000019300090648868113,-0.0000045037457399478694,-0.000024911620029720375,-0.00004240801541003972,-0.000057408296524956014,-0.00007026857023479759,-0.00008129413959746649,-0.00009074675176683227,-0.00009885081187342194,-0.00010579871040501105,-0.0001117553905591977,-0.00011686226399696586,-0.00012124056795727696,-0.0001249942434…	-1e-05	0.000001016059298103927,0.0000030028378427394027,-0.000033636051252091846,0.00008591812826304533,-0.000009510508735863105,-0.0000024855477324086507,-0.000017292723369206155,-0.00006736329290693403,0.000016910463415106445,0.000012179355043217463,0.000004089414275513993,0.000009435094265296129,0.0000013452180081381015,-0.000040331064566497376,0.00007418120101915315,0.00003081839657933588,0.00007143…	-0.0000392486379797687,-0.00003968352479833257,-0.00004015075187277799,-0.00004065272417862006,-0.00004119202553681186,-0.00004177143191354341,-0.00004239392570907687,-0.000043062711109167836,-0.000043781230578091254,-0.00004455318257816748,-0.00004538254060699661,-0.00004627357365039235,-0.00004723086815629341,-0.00004825935164275975,-0.000049364318061571815,-0.00005055145504798791,-0.0000518268…	0.0001172242328190625,0.00007945009895552648,0.00004706499250880779,0.000019300090648868113,-0.0000045037457399478694,-0.000024911620029720375,-0.00004240801541003972,-0.000057408296524956014,-0.00007026857023479759,-0.00008129413959746649,-0.00009074675176683227,-0.00009885081187342194,-0.00010579871040501105,-0.0001117553905591977,-0.00011686226399696586,-0.00012124056795727696,-0.0001249942434…	0.687	0.229	0.084	1	0.526	0.196	0.369	0.435	0.0002875592172106349,0.0002147414136064571,0.00024204665920041118,0.00036949384284809273,0.00024204665920041118,0.00015103584935680954,0.00020564004656254726,0.00014193581725760598,0.0002511487892457681,0.00023294471991742798,0.00016923648561052387,0.00024204665920041118,0.0003330765452791813,0.00020564004656254726,0.00023294471991742798,0.0002875592172106349,0.00014193581725760598,0.00022384297…	none	0.613	43.466	620
2559527	4	1	5	4	30.62,30.63,30.63	16.9004	940.093	30.63	1637,1642,1639,1643,1650,1649,1642,1646,1650,1649,1649,1654,1653,1650,1648,1654,1656,1654,1649,1654,1654,1654,1654,1659,1656,1654,1657,1654,1654,1662,1659,1654,1659,1665,1663,1662,1660,1658,1665,1662,1662,1661,1662,1672,1669,1664,1664,1673,1675,1670,1665,1670,1670,1668,1668,1675,1674,1671,1672,1674,1670,1678,1678,1672,1674,1681,1683,1678,1674,1675,1677,1678,1676,1681,1684,1678,1682,1684,1678,1683…	0.00001261638517209967,0.00003501545294547866,0.000019976053477668565,-0.00004746857863769932,-0.0000250727311128426,0.000027271234947241546,0.00010208419693704902,0.00007581081157040942,0.000019592184367239416,0.00012809668726747127,0.00006438506500176401,0.00004185972121781274,0.00006425558625902349,0.000015529355505580523,0.00009781745697469711,0.00009775214457383378,0.000011594904551241308,0.…	0.0087	0.00041	0.0002509255920036949,0.0001684864807947666,0.00009355192542763253,0.00014214860961451716,-0.000033820188541296384,-0.000045108443039912146,0.00004089468713958122,-3.3303369530905444e-7,-0.00007148664997112858,-0.00010895950588882523,-0.00017635081684364852,-0.00007915587672929303,-0.00011662601944822384,-0.00017653252282839112,-0.00012048969596081984,0.00003657413224291807,-0.0001019106545340206…	5242.98	1193	1641.33	0.772	114.462	23.95215,23.89062,23.8291	17.20508,17.03516,16.90039	-423.106	23.531	20.61	-10.02	-10.02	20.61,21.21,21.75	0.37	18.08	1834,1835,1837,1841,1840,1841,1843,1843,1846,1846,1846,1849,1846,1850,1854,1854,1846,1860,1862,1799,1792,1782,1782,1771,1760,1750,1749,1739,1734,1732,1729,1726,1718,1715,1716,1706,1710,1708,1704,1694,1736,1748,1758,1765,1769,1776,1780,1782,1786,1788,1794,1795,1800,1801,1805,1808,1806,1811,1814,1814,1814,1816,1824,1824,1824,1825,1827,1828,1830,1832,1830,1834,1836,1836,1836,1836,1843,1843,1846,1844…	58.489	0.437	0.0002386242003035768,0.00019446821367728964,0.00015508786164608523,0.00011996664152191856,0.00008864391230830565,0.000060708853050093104,0.00003579507461022805,0.000013575814202959982,-0.000006240350343804065,-0.00002391332280763918,-0.00003967489740348983,-0.00005373179893767888,-0.00006626839415792458,-0.00007744910986074349,-0.00008742058947152185,-0.00009631361638241092,-0.000104244829274057…	3e-05	0.00006056375805832987,0.000030261379105460678,-0.00007270080590888609,0.000011910955893003455,0.000008650955949348806,0.000022291046950872857,-0.000014768240656631684,0.00002929123016939369,-0.000017908043717102162,-0.00003468654366723066,-0.00003287673812259268,-0.000005718752491958894,0.000018060864129512744,-0.000003788848844616734,0.000006470860651393569,0.000058983188241726834,0.00004051162…	-0.000030985482347788795,-0.00001559166585429658,0.00000791001229108089,0.000043789930431095834,0.00009856765812231539,0.0001821965961623662,0.00030987256178712706,0.0005047949484663446,0.0008023821775333153,0.0012567074113480298,0.0019503239308739505,0.0030092655003740457,0.004625947364268754,0.007094129107554102,0.010862292315132372,0.01661513203107909,0.02539796944396375,0.038806692236525046,0…	0.0002386242003035768,0.00019446821367728964,0.00015508786164608523,0.00011996664152191856,0.00008864391230830565,0.000060708853050093104,0.00003579507461022805,0.000013575814202959982,-0.000006240350343804065,-0.00002391332280763918,-0.00003967489740348983,-0.00005373179893767888,-0.00006626839415792458,-0.00007744910986074349,-0.00008742058947152185,-0.00009631361638241092,-0.000104244829274057…	0.687	0.218	0.095	1	1.093	0.1	0.545	0.355	0.0006962294240848241,0.00034888888166465345,0.0005590881278587701,0.0005865129228099474,0.000549946914376927,0.0002575296281348267,0.0004951036736873432,0.0002575296281348267,0.0003671630388238413,0.00033061549340944343,0.00038543796495173844,0.00031234287399355186,0.00033061549340944343,0.0003580258641271497,0.00044940626296264977,0.00044026735779511124,0.00031234287399355186,0.0002575296281348…	none	0.646	44.985	620
2559526	4	1	4	4	30.51,30.51,30.52	20.4854	940.087	30.52	1590,1585,1592,1590,1587,1595,1591,1588,1590,1592,1587,1592,1589,1594,1590,1588,1590,1591,1588,1596,1593,1588,1590,1593,1586,1590,1596,1590,1588,1588,1593,1590,1590,1596,1592,1586,1591,1586,1588,1593,1590,1585,1590,1594,1593,1589,1588,1592,1588,1590,1594,1592,1586,1588,1589,1588,1588,1593,1590,1589,1593,1593,1589,1593,1595,1586,1590,1592,1588,1587,1599,1590,1589,1589,1594,1589,1592,1594,1592,1587…	0.000025057851371067847,0.0000334491127101432,0.000018638184356471194,0.00003089619155879494,0.000054755636109394346,0.00011729101059789733,-0.000009666390268947437,0.00009926590962235168,0.00003418136939051839,0.00006577377651530537,0.00009350053598846635,0.000028418953359903694,0.00006387692307533833,0.00015348124760245388,0.00004198979747274521,-0.000026946833630484944,0.00001237200472708457,0…	0.0117	0.00039	0.00013486825182515186,0.00010072085027482979,0.00006657684463623924,0.00003630245479763183,-0.00002876115229488139,0.000018285779875201827,-0.00010861522144462085,-0.00008090268481393914,-0.00006478452167531519,-0.00013755751433609415,-0.00018713361368645194,-0.00006667635148601836,-0.00017036012371565178,-0.00018515720232325735,-0.00018063457688100734,-0.00026883484243239573,-0.0001561337351244…	5050.88	1210	1589	0.76	85.334	26.08594,26.09668,26.1582	20.18066,20.27832,20.48535	1068.09	19.785	20.75	-9.77	-9.77	20.75,21.91,22.63	0.2	26.53	1800,1798,1804,1804,1810,1806,1809,1808,1810,1809,1810,1811,1813,1812,1810,1812,1812,1810,1812,1738,1738,1724,1710,1706,1699,1690,1686,1683,1677,1674,1670,1667,1664,1666,1660,1661,1656,1654,1654,1670,1714,1729,1743,1752,1757,1764,1768,1772,1776,1776,1780,1782,1782,1782,1788,1788,1792,1790,1792,1796,1794,1792,1790,1791,1797,1794,1794,1796,1798,1796,1800,1798,1802,1804,1806,1802,1807,1803,1806,1804…	86.077	0.537	0.00014620746818221463,0.00011465634599394791,0.00008568592609860121,0.00005908512173086257,0.00003466011182189812,0.000012232928763609058,-0.00000835983831426251,-0.000027268234202471785,-0.000044630030881531935,-0.000060571731367768824,-0.00007520949145047937,-0.00008864996603623505,-0.00010099108626703557,-0.0001123227730746195,-0.00012272759237009129,-0.000132281356642765,-0.00014105367735164…	0.0001	-0.000029383114482898218,0.00003706603303721526,-0.000031828959843556186,0.00004603549856196275,-0.00003753582054442838,0.0000011903734335126768,-0.000030198547956130724,0.00004766649670834718,-0.0000929697623423928,-0.000011854681347488807,0.000004044040643372676,-0.000040389458273694176,-0.00006199315505892356,-0.00006077039217624328,-0.000033459855871393796,0.000008528443963363136,-0.000070145…	0.00006208583592108471,-0.0000043826979531820656,-0.000027225508465467353,-0.000035075749198732314,-0.00003777359058462784,-0.000038700740259491826,-0.00003901936778299802,-0.00003912886844021453,-0.000039166499821831876,-0.000039179432355009554,-0.00003918387679492123,-0.00003918540418679853,-0.00003918592909567191,-0.00003918610948770453,-0.00003918617148186596,-0.00003918619278699788,-0.000039…	0.00014620746818221463,0.00011465634599394791,0.00008568592609860121,0.00005908512173086257,0.00003466011182189812,0.000012232928763609058,-0.00000835983831426251,-0.000027268234202471785,-0.000044630030881531935,-0.000060571731367768824,-0.00007520949145047937,-0.00008864996603623505,-0.00010099108626703557,-0.0001123227730746195,-0.00012272759237009129,-0.000132281356642765,-0.00014105367735164…	0.685	0.205	0.11	1	-0.921	-0.676	2.421	-0.744	0.0009454744469029102,0.0008752386156861743,0.0006558248256647502,0.000638276510334025,0.00085768143255378,0.0005856358183356989,0.0006733738500899702,0.0007435770398816809,0.0007260251785054965,0.000638276510334025,0.0006996987164052052,0.0006733738500899702,0.0006733738500899702,0.0006909235836669372,0.0006031820067268516,0.0006996987164052052,0.0005680903388099216,0.000647050579366209,0.000936…	none	0.686	46.368	620
2559525	4	1	3	4	30.39,30.4,30.41	20.2246	940.118	30.41	1662,1668,1664,1669,1664,1669,1670,1664,1666,1670,1666,1673,1668,1661,1661,1666,1662,1669,1666,1662,1666,1666,1660,1664,1660,1662,1659,1667,1662,1656,1661,1660,1657,1657,1660,1656,1664,1665,1659,1666,1662,1658,1664,1660,1656,1662,1659,1654,1657,1658,1657,1662,1658,1657,1656,1658,1654,1658,1661,1654,1658,1659,1653,1660,1659,1654,1658,1654,1657,1654,1658,1658,1654,1658,1654,1660,1657,1654,1662,1656…	0.000027374849746875687,0.000017137589760064053,0.00007920221176677616,-0.00002305104519042727,0.000016003141339693742,0.00004191442416981333,0.00008425894940475324,0.000047729809605673866,-0.000057793692741367003,0.00006340358183313407,0.00010246096819445528,0.000010070718015647471,0.00016414826327440347,0.00014404744758374024,0.00012066167321053752,0.00010385032667322683,0.000044322889585416046…	0.0084	0.00052	0.00028272255703117277,0.00019030456244955804,-0.0000039421765779388405,-0.000004319905024505342,0.0000248686796093197,-0.00009704511789882002,-0.00008756859646355826,-0.0000583856679478781,-0.00015400076379883115,-0.00019377840401301453,-0.00006608489349771024,-0.0001682610816523361,-0.00026712766260033433,-0.00023467387341989638,-0.00026459245411408435,-0.0002091592428469456,-0.0003014458902329…	5084.26	1188	1667	0.766	119.719	26.02734,26.4834,26.94043	19.83496,19.94531,20.22461	56.3393	5.896	17.95	-12.46	-12.46	17.95,19.53,20.81	0.37	26.23	1882,1883,1886,1886,1888,1896,1894,1894,1897,1892,1893,1894,1891,1894,1898,1898,1902,1901,1902,1814,1802,1786,1770,1758,1752,1744,1734,1731,1726,1726,1718,1721,1716,1710,1710,1705,1703,1701,1698,1716,1769,1790,1804,1814,1822,1830,1838,1841,1846,1849,1853,1855,1860,1860,1861,1864,1866,1868,1868,1874,1872,1874,1875,1876,1878,1877,1880,1878,1878,1878,1885,1886,1885,1884,1890,1886,1884,1886,1890,1889…	86.733	0.488	0.0002477026170709451,0.0001893593839803654,0.0001375990114406063,0.00009167875602220701,0.00005093967795488256,0.00001479718556990871,-0.00001726735338797281,-0.000045714053953895554,-0.00007095111643435774,-0.00009334068394032465,-0.00011320403901551748,-0.00013082621392970648,-0.00014646008079311984,-0.0001603299801836959,-0.0001726349403567225,-0.00018355153323140823,-0.00019323640813680403,-…	0.00019	-5.799494813660995e-7,-0.000056573843031645735,0.000030426815199528144,0.00003162960700998817,0.000034421404667031446,0.00004515836697613832,0.00001617030579186237,0.000023728876814124765,-0.00004974303647165832,0.0000356682870046012,0.0000035034498694316515,-0.000012771031485979594,0.000007497852330710708,0.00003889034925297575,-0.0000028074749943903644,0.000015872779121890464,-0.000057596155843…	0.00007338990725723493,0.0000632209595782788,0.00005360908376009991,0.00004452376247997538,0.000035936150204859485,0.00002781898160796525,0.000020146485002438567,0.000012894300517279358,0.000006039402755721583,-4.3997230948375433e-7,-0.000006564396435988055,-0.000012353314426355864,-0.000017825105864538327,-0.0000229971434703197,-0.000027885848257010594,-0.0000325067416675108,-0.00003687449485427…	0.0002477026170709451,0.0001893593839803654,0.0001375990114406063,0.00009167875602220701,0.00005093967795488256,0.00001479718556990871,-0.00001726735338797281,-0.000045714053953895554,-0.00007095111643435774,-0.00009334068394032465,-0.00011320403901551748,-0.00013082621392970648,-0.00014646008079311984,-0.0001603299801836959,-0.0001726349403567225,-0.00018355153323140823,-0.00019323640813680403,-…	0.672	0.22	0.108	1	-1.943	0.009	1.324	-0.333	0.0006806652268790855,0.0008186514806800671,0.0006979111112019795,0.0005254830778481385,0.0008272770773972945,0.0006461755126056458,0.0005254830778481385,0.0007669014976700273,0.0005168634729712637,0.0005254830778481385,0.0006116885371326027,0.0005772043000251545,0.0005427228008483811,0.0007927757183671835,0.0006116885371326027,0.0006289316825462124,0.0006892880834360374,0.0006892880834360374,0.0…	none	0.625	41.766	620
2559524	4	1	2	4	30.25,30.27,30.27	18.7119	940.123	30.27	1826,1827,1833,1831,1825,1831,1831,1825,1835,1831,1825,1829,1823,1825,1829,1820,1827,1818,1820,1820,1821,1825,1817,1820,1821,1818,1826,1823,1816,1824,1821,1813,1827,1814,1813,1818,1820,1813,1817,1813,1813,1819,1817,1809,1813,1813,1810,1820,1813,1812,1811,1814,1811,1817,1815,1807,1813,1813,1808,1811,1809,1812,1809,1805,1813,1804,1805,1813,1813,1807,1813,1807,1807,1811,1805,1813,1805,1805,1811,1811…	0.000002258623040265973,-0.00001458101822500897,-0.0000247772996375702,0.00008792701895638307,0.000054474398213884204,0.0000642069772372812,0.00015367302531814076,0.00005377566949626936,0.00010337137040834826,0.00005663157118336178,0.0000995827791102998,0.0000960275478817716,0.000019396313323095935,0.0000191636818404011,0.000045502345787803046,0.000178149352521783,0.00012143704624479912,0.0000979…	0.0143	0.00047	0.00018694742851471668,0.000023945068583644025,0.000023712417205000327,-0.00009938473741391316,-0.000019925116547715868,-0.000040081477597387085,-0.00007351809797963157,-0.00011027169644000479,-0.0001403821904301099,-0.0001240145774749879,-0.0002072340885693649,-0.00024729326334797444,-0.00028071103586756586,-0.00020128838132771532,-0.0001782846034586603,-0.00023494019833067504,-0.000328088648613…	5050.44	1198	1830.33	0.763	69.947	24.7207,25.00391,25.27441	18.15137,18.24902,18.71191	2.13	21.431	16.77	-13.5	-13.5	16.77,18.45,19.59	0.79	28.13	2093,2101,2101,2105,2104,2106,2107,2109,2106,2109,2111,2115,2119,2123,2117,2113,2123,2128,2125,2008,1994,1969,1946,1928,1910,1901,1890,1886,1875,1868,1863,1857,1851,1850,1843,1841,1837,1834,1832,1857,1917,1944,1964,1981,1995,2008,2021,2025,2034,2040,2045,2051,2057,2059,2061,2069,2071,2073,2073,2081,2085,2082,2087,2089,2093,2093,2093,2097,2098,2099,2100,2101,2103,2105,2107,2107,2105,2113,2111,2109…	97.967	0.518	0.00012122487458267637,0.0000892621237542234,0.00005945867443188905,0.00003166865109265125,0.000005756033098577688,-0.000018406011067780318,-0.00004093574459106071,-0.0000619434411723278,-0.00008153192477310155,-0.0000997970728960014,-0.0001168282858653554,-0.00013270892440470707,-0.00014751671765298247,-0.00016132414361638597,-0.00017419878391817934,-0.00018620365458269696,-0.0001973975144726482…	0.0016	0.00003372472228003135,-0.000012172189707896552,0.000052233638397730254,-0.00002329706037518616,0.00010202820725873487,0.0000034406663648142234,0.000031627156074488634,0.00006804788027832619,-0.000055223004919999754,0.000032224742443338113,-0.000025194996122795282,0.000014513501379050966,-0.00002479660584975266,-0.00002624355378153604,0.000001940919566796499,-0.000004444819253267578,-0.0000750273…	0.000009982820455281148,0.0000065743477101894935,0.0000031731273225142718,-2.2085613890390592e-7,-0.000003607618072392184,-0.0000069871738435124675,-0.000010359538785133845,-0.00001372472819750046,-0.000017082757348301338,-0.000020433641472740634,-0.000023777395773605077,-0.000027114035421333792,-0.000030443575554087252,-0.00003376603127781645,-0.000037081417666329046,-0.00004038974976136155,-0.0…	0.00012122487458267637,0.0000892621237542234,0.00005945867443188905,0.00003166865109265125,0.000005756033098577688,-0.000018406011067780318,-0.00004093574459106071,-0.0000619434411723278,-0.00008153192477310155,-0.0000997970728960014,-0.0001168282858653554,-0.00013270892440470707,-0.00014751671765298247,-0.00016132414361638597,-0.00017419878391817934,-0.00018620365458269696,-0.0001973975144726482…	0.638	0.239	0.124	1.001	0.675	0.765	-0.289	0.524	0.0005688229710318353,0.0004431512654227634,0.0003175159148896623,0.0003893030933502933,0.0005329130585007255,0.0003175159148896623,0.00032648866329454044,0.0004252011328734082,0.00024574060060764607,0.00028162677497149035,0.0003444347162682788,0.00024574060060764607,0.0003893030933502933,0.00028162677497149035,0.0004431512654227634,0.0004431512654227634,0.00019191689840465976,0.00038930309335029…	none	0.547	40.762	620
2559523	4	1	1	4	30.08,30.1,30.11	18.8262	940.095	30.11	1570,1566,1574,1568,1582,1574,1570,1574,1571,1569,1574,1572,1569,1574,1575,1567,1570,1571,1568,1574,1568,1567,1570,1566,1572,1565,1569,1570,1566,1570,1566,1562,1570,1569,1564,1571,1565,1569,1565,1570,1565,1572,1568,1563,1568,1562,1558,1571,1570,1562,1570,1566,1564,1565,1568,1561,1568,1562,1568,1568,1561,1566,1560,1569,1563,1558,1568,1560,1568,1565,1562,1566,1562,1565,1562,1564,1562,1567,1562,1564…	-0.0000018848860830671792,0.00013776182573827566,0.00008888585890574124,0.0001755225446351164,0.0000647836749351007,-0.000019421842021629954,0.00012021272555934223,0.00008312310661383087,0.00005192785946923966,0.00007374919308176835,-0.000007509326837029145,0.00002019906814414571,-0.00005221411219756391,0.00006972903769875544,0.00005915221591670473,0.00011042627061070457,0.00008806695955461547,-0…	0.0093	0.00053	0.00025195228775740206,0.00012353849931812788,-0.0000018903789616926438,-0.000009519444112191141,-0.000028925467432916665,0.00004589148363098455,-0.00011483445017924149,-0.00010479849529494354,-0.0002036661434652566,-0.00028779777770647535,-0.00018065392270747143,-0.00019122054098713828,-0.0001811861007892771,-0.00027120387883428624,-0.00030824679323763343,-0.00027467650583400956,-0.0002940659299…	5007.18	1156	1569.33	0.769	107.419	24.94336,25.3623,25.69434	18.19336,18.4248,18.82617	192.87	18.935	22.33	-7.78	-7.78	22.33,22.63,22.71	0.28	27.76	1789,1794,1797,1794,1798,1794,1794,1792,1792,1790,1793,1792,1794,1793,1793,1804,1802,1801,1800,1718,1712,1694,1677,1670,1661,1654,1651,1646,1640,1635,1637,1630,1627,1624,1624,1622,1621,1619,1616,1632,1682,1698,1712,1727,1732,1738,1742,1750,1750,1752,1756,1754,1760,1760,1763,1766,1771,1774,1770,1778,1774,1776,1778,1777,1782,1784,1787,1785,1785,1782,1786,1790,1787,1790,1790,1790,1795,1794,1800,1795…	89.808	0.465	0.0002160989554056897,0.00016240086583746075,0.00011417194379771765,0.00007085515283143624,0.0000319501908239854,-0.000002992288409515672,-0.000034375865001874716,-0.00006256301432080937,-0.00008787929350236571,-0.00011061710158457466,-0.00013103905667029755,-0.00014938102912496036,-0.0001658548658421317,-0.00018065083704178506,-0.00019393983386137715,-0.0002058753421215762,-0.0002165952150633210…	7e-05	-0.000019779066000479596,0.00005899950890533697,-0.000048160560379144244,0.00009473707217574384,0.00010779708334872068,0.00002306596699712188,0.00009223269243833816,-5.097130308172991e-7,0.000052622245087284444,0.00003522290203428289,-0.000025452822035455815,-0.00005246513329255812,0.0000952400232645872,0.000008908825741505602,-0.00004374962831752614,0.00009433886241451901,0.000024037218736726283…	0.000005489408935683738,-0.00000671829307043657,-0.000016784629985498177,-0.000025085220779468256,-0.00003192979672703567,-0.00003757375883344996,-0.00004222770796085524,-0.000046065303265731714,-0.000049229742180048104,-0.000051839103732506576,-0.00005399075459251991,-0.00005576498224565377,-0.00005722799087016888,-0.0000584343717038939,-0.0000594291400816001,-0.00006024941515363409,-0.000060925…	0.0002160989554056897,0.00016240086583746075,0.00011417194379771765,0.00007085515283143624,0.0000319501908239854,-0.000002992288409515672,-0.000034375865001874716,-0.00006256301432080937,-0.00008787929350236571,-0.00011061710158457466,-0.00013103905667029755,-0.00014938102912496036,-0.0001658548658421317,-0.00018065083704178506,-0.00019393983386137715,-0.0002058753421215762,-0.0002165952150633210…	0.687	0.214	0.099	1	0.41	1.114	-0.698	0.584	0.0004741581846125428,0.00017444411696575728,0.0002978307433339266,0.0004565222185625292,0.0001568203173528038,0.0001568203173528038,0.00044770450409289584,0.0000951426501330005,0.00022731980728539557,0.00040361861700657003,0.00023613304825573957,0.0002625738443128838,0.00032427529606258824,0.00022731980728539557,0.000271387800738079,0.0002449464680789271,0.000024664611654936074,0.000059902201232…	none	0.658	39.345	620
2559542	6	1	10	6	31.73,31.74,31.75	19.6748	940.146	31.75	1496,1503,1503,1505,1501,1503,1505,1504,1504,1504,1504,1500,1500,1500,1499,1497,1499,1500,1499,1497,1499,1499,1497,1497,1497,1498,1496,1496,1498,1496,1495,1499,1495,1495,1498,1496,1493,1496,1492,1493,1495,1492,1494,1494,1495,1496,1493,1495,1496,1493,1495,1493,1492,1493,1493,1493,1497,1491,1491,1493,1492,1493,1493,1493,1493,1493,1492,1493,1492,1493,1490,1493,1493,1493,1491,1493,1493,1493,1493,1491…	-0.00005101583500275161,0.0000171642495802133,-0.00003477830069417885,-0.00004079065828456482,0.00007332323039144224,0.00011678047501518203,0.000001229463549722148,0.00005174592035171954,0.00009519985708066518,0.0000891847082365476,0.00001250624612575471,0.0001513623062295456,0.000007545939286478799,-0.000005532134005147385,0.00005911211876277796,0.00003543342870487225,0.0001142157215882093,0.000…	0.0083	0.0004	0.00025624624817799076,0.00015480927311110277,-0.000038444281084779584,-0.0000338593286655729,0.00006610077052559857,-0.000007029076019843489,-0.00009073955317531273,-0.00005083883472050378,-0.00010628954708426172,-0.0001052361220946613,-0.00008299503624482602,-0.00012784678446494855,-0.00010913818087797812,-0.00023165396007533823,-0.00009996929242040448,-0.0001201017711873966,-0.0002108406960525…	4729.75	1094	1503.67	0.769	120.632	25.13281,25.19434,25.23145	19.51562,19.54004,19.6748	343.924	24.79	19.59	-12.16	-12.16	19.59,21.57,22.91	0.73	30.01	1693,1701,1707,1708,1708,1704,1707,1705,1709,1707,1705,1703,1704,1706,1704,1704,1705,1706,1706,1622,1622,1612,1599,1585,1582,1576,1572,1570,1566,1564,1558,1560,1557,1552,1550,1550,1547,1546,1546,1568,1621,1631,1651,1653,1660,1656,1661,1665,1665,1668,1677,1678,1675,1677,1681,1683,1682,1685,1685,1685,1689,1695,1693,1696,1694,1700,1699,1704,1697,1707,1706,1707,1701,1704,1699,1695,1697,1701,1701,1701…	97.783	0.468	0.000201163040113243,0.00015625393413993633,0.00011644831202141745,0.00008116621236919745,0.00004989358077552979,0.000022174780124964812,-0.0000023940479637254302,-0.00002417086728795232,-0.00004347296253515387,-0.00006058156206867492,-0.00007574593537891618,-0.00008918702489894369,-0.00010110066509951709,-0.00011166043576522342,-0.00012102019102348149,-0.00012931630097395548,-0.00013666963857855…	0.00016	-0.000014736588146403271,0.00005658062357058837,0.00004969099780139612,0.00003237357719743707,-0.000005797374490953754,-0.00006134118815495122,0.00009339424560501676,0.00005000380784283111,0.00002052081317838653,0.00002405921866688554,0.00007278651104259384,-0.000017523943692387422,0.000057268805463510174,-0.000013923282272962517,-0.0000868411683937396,-0.00000858479996927976,0.000050566865349669…	0.00012650757689883652,0.00008103312842077748,0.00004879251633334792,0.000025934469615670044,0.000009728502485434903,-0.0000017612531297352603,-0.00000990729483372203,-0.000015682700130896316,-0.000019777364454834697,-0.000022680411957654438,-0.000024738623360810906,-0.000026197860309558263,-0.000027232434537124924,-0.00002796593010360161,-0.000028485966009876192,-0.000028854662640332818,-0.00002…	0.000201163040113243,0.00015625393413993633,0.00011644831202141745,0.00008116621236919745,0.00004989358077552979,0.000022174780124964812,-0.0000023940479637254302,-0.00002417086728795232,-0.00004347296253515387,-0.00006058156206867492,-0.00007574593537891618,-0.00008918702489894369,-0.00010110066509951709,-0.00011166043576522342,-0.00012102019102348149,-0.00012931630097395548,-0.00013666963857855…	0.682	0.217	0.101	1	0.628	0.306	-0.067	0.761	0.0007073786877338222,0.0006411312590362006,0.000518127123860859,0.0004519085551721316,0.000518127123860859,0.00040461575836802115,0.0004802867054432806,0.0004613677325621955,0.0004802867054432806,0.0005748939342028579,0.0004802867054432806,0.000518127123860859,0.0005275877436541245,0.0004424495838038503,0.0003667852285615668,0.0004424495838038503,0.00040461575836802115,0.0004140739057392485,0.00…	none	0.646	44.05	620
2559541	6	1	9	6	31.64,31.65,31.66	18.0977	940.126	31.66	1759,1761,1762,1765,1756,1763,1761,1761,1761,1763,1757,1757,1761,1760,1761,1756,1760,1757,1756,1760,1756,1758,1757,1755,1759,1765,1761,1754,1755,1760,1757,1755,1756,1757,1758,1758,1760,1757,1760,1755,1757,1755,1757,1753,1755,1753,1757,1756,1756,1752,1754,1752,1753,1753,1750,1753,1755,1759,1759,1758,1757,1759,1759,1760,1757,1757,1759,1759,1756,1760,1758,1757,1755,1757,1757,1757,1757,1757,1750,1750…	-0.00009249256551891588,0.0000728103398755563,0.00005093106135839808,0.00013522964814281058,-0.000034721706522006856,0.000041176906611901194,0.000030476422519838128,0.00002815703752937182,0.00013479240231184923,-0.000009999242039240865,0.00010500312710184924,0.00021444105843160493,0.00007242572354446688,0.00016508685305439725,0.0001767327434712132,0.0001297108306898485,0.00009945559754088387,0.00…	0.0161	0.00087	0.00034160379616675796,0.00018281705775250086,0.0001581478523684974,0.0000860042158082465,-0.000058711651408971686,0.00003389521331244332,0.000028784862062469455,-0.00012706272752638587,-0.00013216659761346582,-0.0001819196298099053,-0.0002288742316314929,-0.0002674520685028452,-0.00032276065932747197,-0.00035016943713015786,-0.00034131885041339646,-0.00030457731876121875,-0.0003961269329550879,-…	4708.09	1067	1762.67	0.773	61.998	25.53516,26.22656,26.53516	17.4873,17.69531,18.09766	297.314	24.831	19.65	-12.01	-12.01	19.65,21.11,22.19	0.55	26.52	2137,2139,2136,2143,2141,2147,2145,2145,2146,2149,2151,2150,2148,2151,2149,2153,2153,2153,2152,2038,2026,2000,1976,1954,1942,1920,1909,1896,1886,1876,1870,1860,1852,1845,1838,1834,1825,1818,1814,1848,1913,1939,1960,1976,1983,1993,2001,2011,2021,2030,2037,2041,2047,2053,2059,2065,2069,2074,2079,2083,2085,2092,2095,2097,2101,2105,2107,2109,2114,2117,2119,2117,2122,2132,2134,2134,2132,2139,2133,2136…	94.137	0.43	0.0003052698067391575,0.00025269431420351285,0.0002032794289165105,0.00015683514907886343,0.00011318289496333963,0.00007215482227005494,0.000033593176759821246,-0.0000026503123158989287,-0.000036715002320718585,-0.00006873187306680282,-0.00009882403043639696,-0.00012710717972784264,-0.00015369007054611523,-0.00017867491494850046,-0.00020215778045319232,-0.0002242289594219435,-0.000244973316237056…	0.00012	0.00003746317968417816,0.0000011884847893324485,-0.000009021253557928182,0.00003115880623288221,-0.00004160180636746903,-0.000024012208567748924,0.0001100074277436473,-0.000006206460362757052,0.000007909365255127,0.000016812777837691624,0.000050044056107125386,-0.000048780429586879094,-0.00002250402209514814,0.000048952683297187096,-0.000011648293700598353,0.00002853128512378217,-0.00003554157293…	0.00007360549795613945,0.000042548285837106425,0.00001947866401289013,0.0000023423077593872214,-0.000010386756803722215,-0.000019842039026784514,-0.00002686552150458247,-0.000032082637710338456,-0.00003595796616604429,-0.00003883660065439133,-0.00004097488044466312,-0.000042563217025772535,-0.00004374305004218508,-0.0000446194423403747,-0.000045270435700995755,-0.00004575400037454222,-0.000046113…	0.0003052698067391575,0.00025269431420351285,0.0002032794289165105,0.00015683514907886343,0.00011318289496333963,0.00007215482227005494,0.000033593176759821246,-0.0000026503123158989287,-0.000036715002320718585,-0.00006873187306680282,-0.00009882403043639696,-0.00012710717972784264,-0.00015369007054611523,-0.00017867491494850046,-0.00020215778045319232,-0.0002242289594219435,-0.000244973316237056…	0.626	0.262	0.113	1.001	-0.588	-0.021	1.801	-0.78	0.0006165321531717934,0.0005098366160923219,0.0004904402434354093,0.0006553370301742503,0.0005001383214792629,0.0005098366160923219,0.0004710447370166226,0.0006941453747617295,0.0005195351272843292,0.00043225632258424323,0.0003159118609597746,0.0003837756757557741,0.00029652414720451805,0.000422559760254157,0.0003837756757557741,0.00044195310141585377,0.0003740801957883311,0.00039347137217640867,…	none	0.49	37.453	620
2559540	6	1	8	6	31.57,31.58,31.59	18.5225	940.158	31.59	1644,1637,1638,1644,1645,1644,1644,1643,1643,1640,1642,1645,1644,1644,1643,1644,1645,1642,1645,1644,1642,1643,1646,1642,1644,1644,1642,1642,1642,1644,1645,1642,1644,1640,1644,1646,1641,1645,1642,1644,1642,1642,1642,1642,1642,1640,1644,1644,1638,1642,1645,1644,1644,1644,1645,1644,1643,1643,1638,1644,1643,1642,1645,1642,1644,1642,1646,1645,1644,1646,1644,1643,1650,1644,1646,1648,1644,1642,1644,1646…	-0.00010997816311818306,-0.000019764072817977457,0.00009438455575203349,-0.000009724636674595212,0.000014725954734045405,0.000003303186750600293,0.0000456895183396616,0.00009704683777908786,0.0000706726330100106,0.000017399049785781506,0.00011658149971906684,0.00019484953121328913,0.0000967189983950467,0.00011219795201380467,0.00014561335514417603,0.0002029474299175623,0.00009286999037189366,0.00…	0.037	0.00139	0.0002833257407947653,0.0002240593700397998,0.0002485037431555081,0.00011452663069973073,0.00006724559594439649,0.00006479048723170135,-0.00006612611717103683,-0.00008948454444244919,0.0000036505222690137633,-0.0001570971924442097,-0.00012371012383176246,-0.00013511673936109642,-0.00031967416753417527,-0.0003668832682933445,-0.000369322818852802,-0.0002822280375610134,-0.0002876550240098092,-0.00…	4555.39	1025	1639.67	0.775	27.015	25.28906,25.57227,25.83105	17.67969,18.07031,18.52246	97.0926	7.565	21.43	-10.16	-10.16	21.43,22.91,23.77	0.4	26.2	2149,2148,2149,2150,2157,2157,2157,2158,2161,2162,2166,2165,2166,2170,2168,2168,2166,2168,2170,2064,2050,2025,2003,1978,1958,1941,1926,1910,1897,1881,1866,1856,1847,1840,1832,1820,1813,1802,1796,1826,1883,1909,1928,1941,1956,1966,1982,1986,2002,2012,2014,2022,2028,2036,2042,2048,2056,2064,2068,2072,2076,2080,2086,2093,2100,2098,2100,2104,2112,2112,2116,2121,2119,2126,2130,2131,2133,2136,2138,2142…	90.972	0.417	0.0002932593452721552,0.00025629694964187993,0.0002203197156776793,0.00018530138578743143,0.0001512164022247028,0.00011803988843570468,0.0000857476309034128,0.00005431606147559436,0.00002372224016385007,-0.000006056161598886993,-0.000035040877254612557,-0.00006325306098216646,-0.00009071330313638066,-0.00011744164527572383,-0.00014345759478941623,-0.00016878013913468283,-0.0001934277596945445,-0.…	0.00024	0.000009626324577542417,0.0000019481652378836487,0.000004092789435938618,0.00003734399673538297,-0.000019448362832023836,0.000003978176860469619,-0.000011885186332125785,0.00003118784614411068,-0.000020692407832394488,0.00002892842624172579,0.00008510441944306211,-0.00004208756614574442,-0.000012114289119728944,-0.000041072571009287165,0.00002491715006174102,0.000013964544126262633,0.000016109178…	0.0000721084028024205,0.000049900466624651916,0.00002974738694337556,0.000011459031943217995,-0.000005137137669634185,-0.000020197696468727183,-0.000033864731491391994,-0.00004626718274187259,-0.00005752205966034521,-0.00006773554503446103,-0.0000770039967681326,-0.0000854148569586321,-0.00009304747685858007,-0.00009997386550583,-0.00010625936908410719,-0.00011196328742374893,-0.00011713943345884…	0.0002932593452721552,0.00025629694964187993,0.0002203197156776793,0.00018530138578743143,0.0001512164022247028,0.00011803988843570468,0.0000857476309034128,0.00005431606147559436,0.00002372224016385007,-0.000006056161598886993,-0.000035040877254612557,-0.00006325306098216646,-0.00009071330313638066,-0.00011744164527572383,-0.00014345759478941623,-0.00016878013913468283,-0.0001934277596945445,-0.…	0.64	0.254	0.106	1	1.467	-0.184	0.114	1.07	0.0016557035948441827,0.0016376924188166082,0.0015656551834196666,0.0016376924188166082,0.0016376924188166082,0.0017187485939350303,0.0017097416051463346,0.0015656551834196666,0.0015296410460822229,0.0014756254391342133,0.0016016723074992914,0.0014936298949917528,0.0015656551834196666,0.0015026324028308325,0.0014846275737620772,0.0015656551834196666,0.0015296410460822229,0.0014576217296528716,0.0…	none	0.516	38.134	620
2559539	6	1	7	6	31.5,31.51,31.51	16.6045	940.133	31.51	2136,2138,2138,2140,2142,2144,2143,2144,2144,2146,2145,2144,2142,2146,2142,2144,2141,2142,2142,2145,2140,2142,2142,2145,2140,2140,2139,2138,2139,2136,2138,2138,2138,2139,2135,2136,2136,2133,2134,2136,2138,2134,2134,2132,2131,2130,2128,2127,2130,2130,2126,2130,2126,2128,2126,2124,2125,2124,2127,2125,2122,2124,2125,2123,2123,2122,2124,2125,2121,2124,2121,2120,2120,2119,2120,2123,2117,2118,2120,2121…	0.0000422721043175824,-0.000029580602594788692,0.00004361064791333055,0.00009608707496265352,-0.00004138110822771549,7.251587451435383e-7,0.0001326320953388544,-0.00006699020149560065,0.00001999996596717451,0.00015881377434560443,0.0000627770378056623,0.0000012913388727321835,0.00010210180055539067,0.00007514311652386851,0.00012070557613001622,0.00006957408658776251,0.0000736958039799852,0.000077…	0.0571	0.0013	0.0002075977156365213,0.00017718081164038577,0.0001813012421504155,0.000016231842587906945,0.00002380557432126008,0.00007625982065482658,0.000042404834338442494,0.00007759670000858958,-0.0001426304610302243,-0.000052234717864157924,-0.00008607508876166014,-0.00017856814724567064,-0.00012614121091732768,-0.0001530723566383692,-0.00016965089678465443,-0.0002000273993197037,-0.00027869015313211203,-…	4768.2	1102	2138.67	0.769	17.522	23.63086,24.07617,24.36035	16.62891,16.61621,16.60449	170.254	4.978	19.49	-12.02	-12.02	19.49,21.25,22.57	0.28	18.13	2907,2916,2912,2916,2924,2924,2926,2924,2924,2925,2930,2930,2930,2933,2930,2934,2932,2933,2938,2814,2805,2771,2742,2716,2690,2672,2650,2632,2618,2605,2584,2572,2558,2550,2536,2526,2516,2506,2497,2532,2613,2650,2677,2703,2718,2732,2742,2760,2766,2779,2788,2795,2800,2808,2814,2829,2832,2836,2841,2845,2849,2852,2854,2859,2862,2866,2870,2874,2876,2880,2886,2890,2886,2894,2894,2893,2893,2894,2902,2898…	73.128	0.467	0.00020226510536835085,0.00017966126962637484,0.00015745004947426513,0.00013562462540567016,0.0001141782963651305,0.00009310447769065536,0.00007239669909203553,0.000052048602664269685,0.00003205394093550051,0.00001240657494885368,-0.000006899527622406367,-0.000025870294326977607,-0.00004451154975545612,-0.00006282901732865948,-0.0000808283210548856,-0.0000985149872566528,-0.0001158944462674445,-0…	0.00018	0.00011693515702784647,0.00008347164784418803,-0.000042262070576729705,0.000004130963841656264,0.000006164516075498882,0.00003659087460814487,0.00001732969661397819,0.000005167247575228408,0.00003736808671281518,0.000025205079049975702,0.00003611162301024539,0.00007541366357915834,-0.00002370247015267333,-0.00005538060158996048,0.000072641366905895,0.000014337775401258787,-0.000010245534994153607…	0.00006270374096340742,0.00003439638106836022,0.000010520512746908938,-0.000009617609996322239,-0.00002660312784896861,-0.00004092957825356465,-0.00005301323581266417,-0.00006320520771651691,-0.00007180163564248873,-0.00007905230055636016,-0.00008516788043976887,-0.00009032607182698933,-0.00009467675302066957,-0.00009834633901081689,-0.00010144145463515773,-0.00010405203270956722,-0.0001062539271…	0.00020226510536835085,0.00017966126962637484,0.00015745004947426513,0.00013562462540567016,0.0001141782963651305,0.00009310447769065536,0.00007239669909203553,0.000052048602664269685,0.00003205394093550051,0.00001240657494885368,-0.000006899527622406367,-0.000025870294326977607,-0.00004451154975545612,-0.00006282901732865948,-0.0000808283210548856,-0.0000985149872566528,-0.0001158944462674445,-0…	0.551	0.306	0.143	1	0.852	0.276	0.186	0.538	0.0006768292546049659,0.0004730877177001849,0.0005021878002552839,0.00043429064049881023,0.0004730877177001849,0.0004730877177001849,0.00036640409405639524,0.0003567068821927342,0.00045368874586431166,0.0005118882610927403,0.0005894997489288386,0.0005215889386057679,0.0005700955766448051,0.0004148934015263144,0.0004148934015263144,0.0004730877177001849,0.00040519510691322216,0.0003567068821927342…	none	0.37	42.104	620
2559538	6	1	6	6	31.47,31.47,31.47	17.2979	940.154	31.47	1585,1586,1581,1583,1583,1579,1585,1580,1585,1588,1584,1585,1581,1583,1581,1578,1577,1576,1579,1577,1576,1575,1575,1576,1580,1579,1581,1577,1575,1573,1579,1575,1573,1576,1576,1577,1578,1581,1573,1573,1572,1573,1573,1575,1571,1571,1571,1573,1573,1569,1571,1569,1571,1570,1571,1572,1575,1573,1581,1576,1575,1573,1577,1567,1569,1574,1576,1573,1573,1575,1578,1574,1572,1570,1576,1575,1574,1571,1571,1571…	-0.00001726898387769299,-0.0000354123314162801,0.00007148870585120094,0.000016164288162289762,0.00002167633141000194,0.0000035315219700240645,0.00008677856802451786,0.000058491213323052195,0.0000572437674920948,0.00008641562530246201,0.00008854800048625477,-0.000014088213120919688,0.00013675545259709117,0.00009494506321893041,0.00010045744891734189,0.00008230985197788226,-0.000023701416982590366,…	0.0054	0.00041	0.00021128419336873764,0.0002539882917934029,-0.000004149577675753769,-0.000045943661105976804,-0.00006070498897230859,-0.00008560109441921155,-0.00006995493520757357,-0.00002052059580860408,-0.00008933969048346559,-0.00011761165821397505,-0.0001323697638284274,-0.00018765961832187944,-0.00019903743128256497,-0.00013272925386129952,-0.00015086427330863843,-0.00016224306333530625,-0.00029857349223…	5047.04	1171	1583.33	0.768	185.166	22.98633,22.98633,23.0957	17.48047,17.39551,17.29785	108.012	21.922	19.39	-12.08	-12.08	19.39,21.75,23.35	0.28	28.46	1800,1807,1802,1805,1799,1808,1803,1803,1804,1805,1807,1804,1809,1811,1809,1809,1807,1809,1807,1720,1720,1698,1687,1676,1672,1667,1661,1658,1656,1652,1650,1651,1646,1641,1643,1641,1638,1634,1632,1653,1707,1724,1737,1745,1753,1753,1760,1765,1769,1771,1777,1777,1777,1780,1781,1781,1784,1785,1787,1786,1788,1792,1791,1793,1792,1793,1796,1797,1795,1798,1799,1797,1800,1798,1798,1800,1802,1805,1800,1804…	92.201	0.474	0.00023971418935276367,0.00017061762186715683,0.0001132006917737299,0.00006548914862015425,0.000025842456496569157,-0.000007102614914824694,-0.00003447886428560552,-0.00005722760931798021,-0.00007613105345084742,-0.00009183918150696144,-0.00010489210907365093,-0.00011573865408860111,-0.00012475176920475112,-0.00013224136556792493,-0.00013846496894593519,-0.00014363657461446375,-0.0001479340054702…	7e-05	0.00001987646360611375,-0.000036762585126209676,-0.000010857214517568967,0.000016668326748810206,-0.00004968070150823769,0.00004258659381646221,-0.00003347715514546093,0.0000037583293836260624,0.000019954154838640216,-0.0000399217427304905,-0.00004800404787176859,0.00004426359128391792,-0.00005122138946781277,-0.000010750389081212436,-0.000012359201616896414,-0.000017205025837294522,-0.0000236692…	0.000009209242982063268,0.00000229293462097554,-0.000003915259350377687,-0.000009487838011385368,-0.000014489877747323138,-0.000018979792209181273,-0.00002301001446630684,-0.000026627609318015485,-0.00002987482291472735,-0.000032789576107083914,-0.00003540590728436021,-0.00003775436987362448,-0.00003986238914162687,-0.000041754582466137734,-0.00004345304681685326,-0.000044977616803060775,-0.00004…	0.00023971418935276367,0.00017061762186715683,0.0001132006917737299,0.00006548914862015425,0.000025842456496569157,-0.000007102614914824694,-0.00003447886428560552,-0.00005722760931798021,-0.00007613105345084742,-0.00009183918150696144,-0.00010489210907365093,-0.00011573865408860111,-0.00012475176920475112,-0.00013224136556792493,-0.00013846496894593519,-0.00014363657461446375,-0.0001479340054702…	0.686	0.213	0.101	1	0.641	0.751	-0.113	0.362	0.0002921662014844727,0.000151338675819925,0.00027456026322712665,0.00022174673043095326,0.0003097728535008893,0.0002569550386710251,0.0002569550386710251,0.00031857644718684397,0.00009854012467548791,0.00023054853990003344,0.00037140175724661724,0.00009854012467548791,0.000151338675819925,0.00008094203395032592,0.0002393505277582246,0.0003978168219949298,0.0002921662014844727,0.00019534237228631…	none	0.661	42.736	620
2559537	6	1	5	6	31.43,31.44,31.44	17.4795	940.135	31.44	1360,1354,1357,1357,1357,1357,1352,1359,1353,1357,1357,1357,1354,1355,1355,1353,1356,1353,1349,1351,1348,1348,1347,1349,1349,1348,1354,1352,1349,1349,1349,1351,1353,1357,1347,1349,1351,1351,1357,1353,1355,1354,1354,1349,1355,1349,1349,1349,1346,1349,1347,1348,1354,1356,1351,1353,1353,1349,1355,1353,1352,1355,1353,1349,1354,1351,1352,1353,1353,1348,1351,1349,1353,1356,1353,1346,1354,1352,1354,1347…	-0.000041066785499439015,0.0001189127245439025,0.00010808641289038907,0.00006548006757901349,0.0002175497283810108,0.000012054521226297163,0.00005683975593793278,0.00004998748332664356,-0.00000849946305121523,-0.00003917945352366994,0.0001327157953394898,0.000026551763884737454,0.000015728258842136255,0.00010023743211503738,0.00004571656538094819,0.00015406895932612138,0.00008365143987759274,0.00…	0.0042	0.00036	0.00015555691417784985,0.00007322300042844724,0.0000028198527751355327,-0.00007551342279858707,-0.0000982460418892509,-0.00012891823339771953,-0.00009209096190848726,-0.00020613465070872176,-0.00022489040016082664,-0.00014440107280878708,-0.0002385837414762609,-0.00016603740067041282,-0.00017288516675065637,-0.00024324586760749226,-0.000099236218494862,-0.000213275719258228,-0.0002677534425143657…	4707.74	1076	1356	0.771	237.612	24.68848,25.04688,25.67578	17.24707,17.28418,17.47949	633.76	9.157	22.29	-9.15	-9.15	22.29,22.95,23.35	0.28	30.07	1549,1550,1551,1553,1553,1554,1553,1556,1556,1557,1556,1556,1557,1557,1557,1555,1556,1557,1557,1493,1495,1486,1478,1473,1470,1462,1462,1458,1458,1450,1453,1448,1446,1446,1442,1442,1443,1440,1440,1459,1497,1509,1514,1522,1520,1520,1521,1525,1525,1530,1529,1531,1533,1536,1545,1543,1543,1549,1546,1551,1549,1549,1541,1551,1545,1545,1544,1543,1547,1547,1545,1552,1547,1549,1549,1551,1549,1550,1552,1549…	93.842	0.446	0.00016843972363420021,0.00009296759998561862,0.000033457187402701,-0.000013467279997728967,-0.00005046762237892195,-0.00007964270762054939,-0.00010264751092985266,-0.00012078699435952341,-0.00013509013160748387,-0.00014636827720226762,-0.00015526119110304682,-0.0001622733294889219,-0.00016780246035550493,-0.00017216222715665396,-0.00017559994042824228,-0.00017831060663509997,-0.00018044799003636…	9e-05	0.000057416880492264704,0.0000010169495930524038,0.0000815912176050976,-0.000033020447789589194,-0.000007240127853127322,0.00006990792357459634,-0.000017310014182647297,0.000030728636669092604,-0.00003080349142563032,-0.0000272786478110465,-0.00000834606977727942,0.00002085987893302922,4.1602348134761514e-7,-0.00002173880738730645,0.00006225555459957669,-0.0000677568129844774,-0.00002485965251254…	0.000058174060004185786,0.000013747345473171747,-0.000009825154125805114,-0.000022332555206653874,-0.000028968893501639217,-0.00003249008752754474,-0.000034358408100870804,-0.00003534972574455441,-0.00003587571185459812,-0.00003615479635361992,-0.000036302876609176055,-0.00003638144694239925,-0.000036423135803886006,-0.00003644525561808006,-0.00003645699223458937,-0.00003646321960005809,-0.000036…	0.00016843972363420021,0.00009296759998561862,0.000033457187402701,-0.000013467279997728967,-0.00005046762237892195,-0.00007964270762054939,-0.00010264751092985266,-0.00012078699435952341,-0.00013509013160748387,-0.00014636827720226762,-0.00015526119110304682,-0.0001622733294889219,-0.00016780246035550493,-0.00017216222715665396,-0.00017559994042824228,-0.00017831060663509997,-0.00018044799003636…	0.712	0.199	0.089	1	2.146	0.61	0.258	0.132	0.0001602946812741974,0.00011422693310554918,0.000012895084796429357,0.00004974029410865791,0.0001234400918169139,0.00025244484010048635,0.0003261790477314882,0.0003907067501229318,0.00043680383675760297,0.00023401324404879087,0.0004921268000691865,0.0003814879199098719,0.00023401324404879087,0.0002247977393556774,0.00034461455582736745,0.00027087721842820216,0.0003999257760294897,0.0005290126911…	none	0.732	46.959	620
2559536	6	1	4	6	31.38,31.39,31.4	17.1611	940.136	31.4	1618,1620,1621,1621,1619,1619,1619,1619,1617,1620,1625,1623,1623,1621,1621,1621,1613,1617,1615,1615,1623,1619,1619,1617,1614,1617,1619,1618,1613,1612,1613,1612,1613,1613,1612,1609,1615,1615,1620,1613,1615,1613,1621,1617,1619,1613,1612,1611,1609,1612,1615,1610,1613,1619,1617,1615,1613,1610,1616,1614,1617,1610,1616,1611,1615,1615,1613,1609,1609,1609,1613,1615,1615,1615,1617,1613,1607,1608,1610,1612…	0.00005054368254396095,-0.000009965209452908375,0.000016400103489485826,0.00014516987942237938,-0.000033250567509840894,0.00009860535068525188,0.00011256211800070442,0.00011100314278223262,0.00011565040825889252,0.00009237041459508146,0.0000908117779535027,0.00007684201830586181,0.000034950386183176206,0.00006441742171706045,0.00004114196754647248,0.00009853274347682374,0.00011248801587263992,0.0…	0.0122	0.00056	0.0002583098533272103,0.00005815766464478819,0.00003798669740170211,0.000039531124698214914,-0.00014190741019545167,-0.00007524151382006262,-0.00003337920595053204,-0.00012176674954112707,-0.000163629938117333,-0.00016208417027519122,-0.00020084202444980653,-0.00017139413313416255,-0.0002380493304122815,-0.00032638737499409787,-0.0003279396321343697,-0.0002427098179322323,-0.00038372391042016063,…	5014.96	1110	1620.67	0.779	81.871	23.47949,23.71387,24.04688	17.29492,17.22168,17.16113	302.464	11.884	17.33	-14.07	-14.07	17.33,19.09,20.45	0.45	30.39	1823,1823,1829,1831,1829,1832,1832,1832,1834,1832,1836,1837,1832,1837,1835,1835,1837,1836,1839,1745,1734,1710,1696,1686,1671,1661,1654,1645,1636,1629,1626,1622,1617,1612,1608,1605,1604,1598,1596,1612,1664,1683,1701,1709,1723,1729,1740,1745,1748,1756,1759,1765,1768,1773,1775,1783,1781,1785,1788,1787,1789,1792,1799,1800,1797,1803,1805,1804,1807,1809,1809,1813,1811,1813,1813,1815,1815,1814,1816,1821…	99.744	0.387	0.0001864154870874555,0.00014206562010141084,0.00010120205347406881,0.00006355073248966392,0.000028859145609869976,-0.0000031053690146443536,-0.00003255718390916254,-0.00005969381998108112,-0.00008469727120937262,-0.00010773522520148471,-0.0001289621878034367,-0.0001485205193053984,-0.0001665413891921455,-0.00018314565584150145,-0.00019844467707053057,-0.0002125410569654753,-0.0002255293340041111…	0.00012	-0.00006229375732539134,-0.00007524123166844901,0.000016067434277917644,-0.00004032401641114036,0.000014496399148100566,-0.0000644822919128554,-0.00003225443518520917,-0.0000034997543685216156,0.00001830549016466824,-0.00007457274539999842,-0.000023232544737274745,-0.000013592115441305205,0.00007772737646922882,-0.00006728885381052151,0.00003965945234301383,0.000019757981457539928,-0.000071381745…	0.00007097177435732411,0.00003855753292610899,0.000014603578849736185,-0.0000030982673313813933,-0.000016179838633591894,-0.00002584705108046976,-0.000032991070276182005,-0.0000382704629190103,-0.00004217190633812625,-0.00004505505252223138,-0.00004718568240095549,-0.00004876020668457967,-0.000049923771855836356,-0.0000507836404027001,-0.000051419078740104975,-0.000051888664332131354,-0.000052235…	0.0001864154870874555,0.00014206562010141084,0.00010120205347406881,0.00006355073248966392,0.000028859145609869976,-0.0000031053690146443536,-0.00003255718390916254,-0.00005969381998108112,-0.00008469727120937262,-0.00010773522520148471,-0.0001289621878034367,-0.0001485205193053984,-0.0001665413891921455,-0.00018314565584150145,-0.00019844467707053057,-0.0002125410569654753,-0.0002255293340041111…	0.677	0.233	0.09	1	1.239	0.204	0.815	-0.02	0.00010153938432909935,-0.00014747719608427127,-0.00010917624519048798,-0.00018577476946916307,-0.000013409087444291696,0.000024903689423535227,0.00008237919277000842,0.00016860671237579257,0.00013028125671489272,0.000015325178336951868,0.00012070042123423539,-0.00020492228978192186,-0.00014747719608427127,-0.00013790227502555568,-0.00013790227502555568,-0.00003256420849286359,-0.0000134090874442…	none	0.595	39.568	620
2559535	6	1	3	6	31.36,31.36,31.37	18.6592	940.152	31.37	1611,1619,1616,1619,1616,1619,1620,1617,1617,1613,1617,1613,1615,1615,1619,1609,1609,1613,1612,1612,1612,1617,1617,1613,1613,1617,1617,1615,1616,1612,1611,1606,1615,1613,1612,1607,1614,1612,1613,1613,1609,1607,1606,1613,1613,1610,1611,1612,1607,1607,1607,1613,1611,1610,1608,1612,1609,1611,1609,1605,1605,1605,1613,1612,1613,1611,1609,1612,1605,1604,1609,1607,1615,1609,1615,1609,1609,1605,1603,1615…	0.00007837916608581105,0.000016135936191897314,0.00008635422460036572,0.000028677670943313356,-0.00000615636224164141,0.00007319312377412462,0.0000703288351170544,-0.000014746634390538642,0.000014358869704641965,0.00011198301386392443,0.00004060216509595234,-0.000007932704550446348,0.000025739942849592958,-0.000004525779720616398,0.00007025354608372645,0.00008109234059408088,0.0001147710137765581…	0.007	0.00023	0.00003936742836214351,0.0001095841486547782,-0.00004399378565960786,-0.00001489183923504902,-0.00006798383358496527,-0.00010280686746661754,-0.00012393094330417968,-0.00017244374038328153,-0.00005660434046509719,-0.00009599341867939522,-0.00003493309228713825,-0.0001382404306850917,-0.00013653709855148647,-0.00011200752483928042,-0.00013313045432597468,-0.00028661382160142927,-0.0002575286607372…	5079.33	1262	1618	0.752	142.934	24.45508,24.52832,24.75098	18.85352,18.74414,18.65918	-1848.12	23.085	24.91	-6.46	-6.46	24.91,24.85,24.81	0.4	30.63	1851,1851,1853,1856,1855,1853,1858,1852,1852,1849,1849,1851,1852,1853,1849,1852,1853,1852,1855,1777,1780,1770,1761,1758,1752,1749,1741,1741,1734,1734,1732,1730,1729,1726,1728,1726,1720,1722,1724,1738,1785,1797,1807,1811,1819,1819,1821,1824,1827,1829,1833,1837,1835,1840,1839,1843,1840,1843,1841,1843,1843,1844,1843,1845,1849,1845,1845,1849,1849,1847,1849,1849,1846,1847,1848,1852,1852,1850,1853,1853…	99.947	0.613	0.00007430413872795358,0.00004362327434207579,0.00001702875975196383,-0.000006023661372430312,-0.000026005756473124246,-0.00004332645881751515,-0.000058340236311376,-0.00007135434567906925,-0.0000826351204676616,-0.00009241342155884852,-0.00010088936173332998,-0.00010823640097577453,-0.00011460489633072464,-0.00012012517895718935,-0.00012491022135379903,-0.0001290579493392438,-0.00013265324610263…	4e-05	0.000026662208398010847,0.00004969107646393359,0.00001120248854917895,-9.209318551901845e-7,0.00004847116882889256,0.000048650434269091434,-0.000005655608560672812,0.00005603982520964932,0.000054461364686329894,-0.000013905125708805466,-0.00001548330186359177,0.000021603722409324967,0.00007099821260527078,0.00009402929942582416,-0.0000024640043984661414,-0.000039190408065558695,0.0000383186176153…	-0.000005694208830383789,0.00020558031854975376,0.0015467252354245506,0.010060149500825153,0.0641023277999492,0.4071554805934439,2.584815029958136,16.40833209815388,104.15833149105568,661.1846190463478,4197.119515619464,26642.802730457723,169125.26061426738,1073586.5153819984,6814996.184515566,43260764.10995921,274614051.2332153,1743216484.6413865,11065725510.689226,70243875133.56224	0.00007430413872795358,0.00004362327434207579,0.00001702875975196383,-0.000006023661372430312,-0.000026005756473124246,-0.00004332645881751515,-0.000058340236311376,-0.00007135434567906925,-0.0000826351204676616,-0.00009241342155884852,-0.00010088936173332998,-0.00010823640097577453,-0.00011460489633072464,-0.00012012517895718935,-0.00012491022135379903,-0.0001290579493392438,-0.00013265324610263…	0.681	0.197	0.121	0.999	1.544	0.585	-0.027	0.442	0.0008108324214956025,0.0007450835946963729,0.0006230050325704558,0.0006230050325704558,0.0006981262404383404,0.0006042267607308218,0.0006605640122620699,0.0005291217917752466,0.0005478968163940902,0.0008108324214956025,0.0008484076492317105,0.0007544756748408807,0.0005854493008016864,0.0006230050325704558,0.0007356917176612196,0.0007826531340181087,0.0007356917176612196,0.0006981262404383404,0.0…	none	0.707	51.545	620
2559534	6	1	2	6	31.31,31.32,31.32	20.1562	940.135	31.32	1762,1755,1757,1757,1765,1763,1765,1763,1761,1761,1756,1762,1761,1757,1761,1757,1759,1759,1757,1757,1761,1757,1758,1757,1761,1755,1749,1749,1755,1751,1752,1756,1757,1752,1749,1753,1755,1760,1755,1752,1749,1749,1752,1754,1756,1756,1753,1754,1752,1749,1747,1748,1748,1757,1752,1753,1749,1751,1752,1753,1750,1747,1746,1745,1747,1754,1749,1745,1749,1753,1753,1749,1749,1745,1749,1749,1747,1749,1752,1744…	0.000039955146792215976,0.00010567951990396535,0.00003086703549587718,0.000045059550053673254,0.00006393652733076298,0.0001156065812113284,0.00021413766485033328,-0.00003400083423105224,0.00011133968264463601,0.0001864389262234046,0.000050723510063008786,0.00014455025161138146,0.00018216916089891969,0.00007456265328745824,0.00012154422222708157,0.0001591601407662654,0.00010776979117110742,0.00008…	0.0168	0.00061	0.00013643190524724206,0.000033529896210171197,-0.00006934545212566362,-0.00009261317122687091,-0.000115879127044793,-0.00012041868572122343,-0.00022325130097555757,-0.00013885937256789921,-0.0001855239437062154,-0.00025558106975283166,-0.0002179998768740215,-0.0003582312942069972,-0.0002925853436923984,-0.00043746619533907024,-0.00032504945293822783,-0.0002126061015975113,-0.000394933145821938,-…	5231.6	1319	1756.33	0.748	59.533	26.18359,26.07227,26.05957	19.08301,19.50977,20.15625	-2072.48	21.912	20.85	-10.47	-10.47	20.85,21.75,22.43	0.39	27.55	2004,2012,2015,2013,2013,2016,2017,2016,2017,2017,2019,2017,2016,2018,2017,2017,2021,2019,2019,1930,1930,1910,1894,1885,1878,1872,1866,1858,1852,1853,1851,1845,1842,1838,1836,1836,1832,1831,1829,1845,1901,1927,1940,1948,1961,1968,1975,1981,1976,1981,1981,1986,1989,1994,1997,1998,1996,2001,2001,2003,2003,2004,2005,2005,2005,2010,2009,2006,2009,2012,2013,2013,2013,2013,2013,2013,2016,2013,2015,2015…	92.203	0.645	0.00008488034206304018,0.00004952890605507013,0.00001622063853524015,-0.00001516254728279611,-0.000044731913251861994,-0.00007259229074451452,-0.000098842452308517,-0.00012357546184214467,-0.00014687900453078773,-0.00016883569771456954,-0.00018952338378908562,-0.0002090154061776777,-0.00022738086935363932,-0.0002446848838341994,-0.00026098879701485676,-0.0002763504106624318,-0.0002908241858379109…	4e-05	0.000024877619022338525,0.000019945769091203175,0.000020067037643521942,-0.000020234525524537136,0.000032100275979503215,-0.000016623562982381484,0.00006097870598737523,0.000007198684615734606,-0.000006154324255361925,0.00009166492663982591,0.000027774689265261158,-0.00004452673792085246,0.00003475483467364771,0.00006182758395753778,0.0000029946594011100883,-0.000025516078781039585,0.000040293182…	0.000009043645238419818,0.000295525336122186,0.0025714818369414706,0.020652839768200072,0.16430035874345295,1.3055094308825004,10.371855690276183,82.3995292358001,654.6240624655213,5200.667274912445,41316.7505417202,328241.31539487833,2607716.232649688,20717026.256533526,164586610.8958279,1307559885.8016417,10387921870.749687,82526943480.40556,655636082457.9944,5208707053629.427	0.00008488034206304018,0.00004952890605507013,0.00001622063853524015,-0.00001516254728279611,-0.000044731913251861994,-0.00007259229074451452,-0.000098842452308517,-0.00012357546184214467,-0.00014687900453078773,-0.00016883569771456954,-0.00018952338378908562,-0.0002090154061776777,-0.00022738086935363932,-0.0002446848838341994,-0.00026098879701485676,-0.0002763504106624318,-0.0002908241858379109…	0.664	0.204	0.132	1	0.88	0.567	0.292	0.141	0.00025620350003311706,0.00013077031477712068,0.00032789587474145763,0.0002651643996816516,0.00025620350003311706,0.00015764580486299888,0.00007702432350710745,0.00009493891490507685,0.000059110471053257735,0.000005373346746810016,0.00030997167151954345,0.00008598152683430845,0.00009493891490507685,0.00007702432350710745,-0.000012537550540097889,0.0000501538219113859,0.000005373346746810016,0.000…	none	0.667	51.245	620
2559533	6	1	1	6	31.25,31.26,31.27	17.3516	940.098	31.27	1518,1526,1525,1524,1523,1523,1518,1518,1520,1525,1524,1523,1521,1516,1518,1516,1516,1522,1525,1517,1518,1518,1522,1516,1513,1514,1514,1512,1514,1518,1518,1509,1518,1517,1516,1510,1512,1514,1512,1518,1514,1516,1515,1514,1509,1510,1512,1509,1514,1514,1510,1507,1512,1518,1514,1513,1515,1510,1508,1510,1511,1512,1510,1510,1510,1506,1504,1508,1516,1510,1512,1510,1510,1506,1510,1508,1510,1510,1506,1505…	0.0000159920893537083,0.00004902158216680688,-0.000040158254628626334,-0.00002109883596715697,0.00006779614779447887,0.00005892227478001859,0.0001583085462973063,0.0000027686665035258635,0.0000672202995802361,0.00000597363775883155,-0.00003082663239439972,0.00005107588227029224,0.000028237475508629926,0.000012383200149607896,0.00005937344930465211,0.0001762112799053896,0.00005210285527009035,0.00…	0.0067	0.00043	0.0002086626770970289,0.00011597631551771799,0.00007567923334735899,-0.00006933056776197201,-0.00012705596619315342,-0.00014290052268972286,-0.00004009110878343012,-0.00008036952177155165,-0.0002218281946674741,-0.00012601912894556739,-0.00021513171595168685,-0.00018561761206120498,-0.00008980435241380701,-0.0001579879379629238,-0.00028197082256560486,-0.00032919541636900054,-0.000219463179484673…	4867.43	1079	1525	0.778	149.722	24.44727,24.99023,25.63184	16.7041,16.91211,17.35156	139.28	7.32	17.03	-14.24	-14.24	17.03,19.49,21.05	0.29	26.79	1714,1718,1718,1722,1726,1721,1728,1724,1726,1726,1725,1730,1728,1726,1726,1730,1728,1730,1730,1642,1637,1619,1608,1602,1588,1581,1576,1570,1566,1558,1558,1557,1550,1552,1544,1547,1541,1542,1541,1561,1614,1635,1644,1653,1662,1670,1676,1682,1684,1686,1691,1692,1698,1696,1694,1698,1698,1697,1700,1702,1708,1705,1705,1709,1712,1714,1710,1714,1716,1713,1718,1718,1717,1718,1718,1720,1723,1720,1724,1720…	86.645	0.39	0.0001976111407162746,0.00013748596343482082,0.00008572135390902527,0.00004115475268613592,0.0000027852573348712884,-0.00003024885639858963,-0.00005868948769084502,-0.00008317537264082323,-0.00010425642937344348,-0.0001224061084179963,-0.00013803202573316393,-0.00015148511718128717,-0.00016306752004834242,-0.00017303935861734914,-0.00018162458618952842,-0.00018901601475669266,-0.00019537964528415…	0.00011	0.000006625105037526885,-0.000028296183346549506,0.0001534443145105848,-0.00003936219797908323,-0.000018867081009835657,-0.000008447038785000352,0.00005235679129024633,-0.000014475716402916558,0.00007823929218593069,-0.0000658420388295422,0.0000033502990993888183,0.00003560346969412949,0.000009076920958171006,0.0000749217057042264,0.00009542196364848002,0.000016827260546735564,0.00004404275300993…	0.00004024113418600494,0.000025631055372933817,0.000012920512960633353,0.000001862537813343356,-0.000007757729394116598,-0.000016127212948762766,-0.000023408534086825754,-0.00002974317076654911,-0.00003525420662161255,-0.0000400487225080582,-0.000044219877113096595,-0.00004784871705256152,-0.00005100575162767639,-0.00005375232283906478,-0.00005614179727773258,-0.00005822060305177279,-0.0000600291…	0.0001976111407162746,0.00013748596343482082,0.00008572135390902527,0.00004115475268613592,0.0000027852573348712884,-0.00003024885639858963,-0.00005868948769084502,-0.00008317537264082323,-0.00010425642937344348,-0.0001224061084179963,-0.00013803202573316393,-0.00015148511718128717,-0.00016306752004834242,-0.00017303935861734914,-0.00018162458618952842,-0.00018901601475669266,-0.00019537964528415…	0.687	0.225	0.088	1	1.049	0.669	0.117	0.214	0.00021717507673654706,0.00029019949691835303,0.00014416293317727865,0.00010766146384140628,0.00014416293317727865,0.00029019949691835303,0.00029019949691835303,0.00036323619785204434,0.00036323619785204434,0.00027194224071375037,0.00007116306211362775,0.00008941187955870452,0.0001259118150261376,0.00019892089007462102,0.00019892089007462102,0.00029019949691835303,0.00022630245779685387,0.0003541…	none	0.624	41.993	620
2559552	7	1	10	7	32.57,32.58,32.59	17.0957	940.186	32.59	1446,1444,1446,1450,1449,1453,1450,1444,1446,1451,1450,1441,1444,1444,1440,1447,1445,1444,1443,1446,1451,1442,1442,1443,1445,1446,1438,1444,1446,1442,1440,1443,1441,1442,1446,1437,1438,1438,1436,1438,1436,1437,1434,1438,1442,1444,1436,1437,1436,1433,1434,1438,1442,1434,1435,1435,1433,1438,1441,1438,1433,1435,1437,1437,1443,1430,1431,1434,1436,1438,1439,1430,1436,1436,1438,1432,1430,1431,1437,1434…	0.0000671396458244397,0.00005180228595650465,0.00001191167334015527,0.00001060679133447912,0.000033855479806987524,0.00011674390546813113,0.00008386398697467394,0.00012114925088263413,0.00005669739582167496,-7.295359352590833e-7,-0.00008269589815545278,0.00006681317377278156,0.00010058795428479289,0.00008174218652519816,0.0000909607847201258,0.00014227860124335038,0.00009536592905482562,0.0001221…	0.0143	0.00048	0.00017434241098355702,0.00014146034101887253,0.00007700994478973838,-0.00000847316329839136,0.000053353593283558656,-0.000014589301990817509,-0.000033428246429503755,0.000021379607174247315,-0.00012720308989025035,-0.00007240715035635257,-0.00019641848523471421,-0.0002187533887966888,-0.00015695800385507344,-0.00022135902748835945,-0.00017008146256844122,-0.00012581023737901723,-0.00025681200771…	4533.81	1006	1446.67	0.778	69.86	24.97266,25.40625,25.64062	17.08301,17.14453,17.0957	-742.353	12.779	19.85	-12.74	-12.74	19.85,21.81,23.15	0.59	24.83	1598,1600,1608,1604,1606,1606,1610,1612,1609,1611,1613,1611,1614,1611,1614,1614,1614,1614,1611,1544,1541,1529,1522,1512,1506,1505,1496,1494,1490,1489,1484,1476,1470,1472,1470,1466,1471,1464,1466,1474,1526,1538,1550,1558,1564,1572,1568,1570,1572,1572,1580,1586,1589,1592,1593,1598,1597,1598,1597,1598,1600,1596,1596,1596,1596,1604,1605,1608,1612,1610,1611,1612,1605,1608,1602,1605,1606,1606,1610,1608…	81.021	0.392	0.0001771971158212658,0.0001449942971338939,0.000114964395972633,0.00008696079254555996,0.00006084676037843413,0.000036494798753152684,0.000013786010190591595,-0.000007390480061583065,-0.00002713806537046128,-0.000045553162531869896,-0.00006272568252152453,-0.00007873946948177375,-0.00009367271008727237,-0.00010759831528829491,-0.00012058427629553541,-0.0001326939965444758,-0.0001439866012601245,…	6e-05	0.00001719416305151663,0.00005959880776517171,0.00008632586277471713,0.000003292433141451946,-0.000015277239133634328,0.0001368918292566713,0.000010295427056478265,-0.0000030485103197226804,-0.000007682194546100472,0.00000858818070449183,0.00008757941550551541,-0.00003203424464634031,0.00001733324720862849,-0.000027365922543700598,0.000060329490148907327,0.00003130474253010043,-0.0000342984411009…	0.00002635047154673616,0.00008775330985553205,0.00021675285003892482,0.00048776444862072793,0.0010571252886783563,0.002253279873528274,0.004766248258766461,0.010045674668354621,0.021137076923148666,0.04443869994686024,0.09339244114802157,0.1962380144006509,0.4123034606389259,0.8662294351042503,1.819870074464358,3.8233475580130016,8.032398495460177,16.875078255776504,35.45242181981816,74.481053778…	0.0001771971158212658,0.0001449942971338939,0.000114964395972633,0.00008696079254555996,0.00006084676037843413,0.000036494798753152684,0.000013786010190591595,-0.000007390480061583065,-0.00002713806537046128,-0.000045553162531869896,-0.00006272568252152453,-0.00007873946948177375,-0.00009367271008727237,-0.00010759831528829491,-0.00012058427629553541,-0.0001326939965444758,-0.0001439866012601245,…	0.681	0.229	0.09	1	1.054	0.145	-0.098	0.953	0.001128102377154601,0.0011471191032398807,0.0011090864837301937,0.0008809606836571752,0.0008809606836571752,0.0010330312351836154,0.0009950086049804934,0.0011090864837301937,0.0009189733297999386,0.0008809606836571752,0.0011090864837301937,0.0009950086049804934,0.0009950086049804934,0.0009569893033801279,0.0010140195039702324,0.0008809606836571752,0.0010520437986933934,0.0011090864837301937,0.00…	none	0.609	41.718	620
2559551	7	1	9	7	32.52,32.52,32.53	17.8271	940.185	32.53	1444,1449,1441,1437,1440,1441,1438,1441,1448,1446,1448,1438,1438,1442,1442,1445,1446,1440,1438,1443,1444,1444,1438,1442,1445,1444,1446,1446,1441,1438,1443,1442,1446,1441,1437,1445,1446,1449,1440,1438,1439,1443,1446,1446,1450,1440,1440,1443,1441,1443,1444,1448,1437,1441,1449,1446,1440,1446,1445,1446,1446,1438,1441,1446,1444,1446,1451,1442,1440,1440,1438,1438,1448,1448,1446,1440,1442,1446,1446,1450…	-0.00005216961474914233,-0.00008103256433375123,0.00008332893441305057,0.00006866580724246183,0.00003411089813860417,0.000022291996956885147,0.00007583349078134484,-0.000024074628160920297,0.000012411321434905,0.000014800817883142352,0.00001719026991759515,0.00010483018136020811,0.00012427098424736035,0.00013518582768380004,0.00006084515808823698,-0.000044731439227302406,0.00004289144471895711,0.…	0.012	0.0004	0.00014906278679858756,0.00010598262103723168,0.00013110459883761876,0.000022679224455985107,-0.0000601532853259013,-0.00007764625698748043,-0.0000070848057497860465,-0.00004446365544114037,-0.00005911651714678163,-0.0001192090047864608,-0.00006853890689347842,-0.00010023009174344741,-0.00020290478208891645,-0.000166442680110158,-0.00021799830246683918,-0.00025535286701756444,-0.00017346963954398…	4779.67	1040	1442.33	0.782	83.451	24.9707,25.13184,25.24316	18.38867,18.18066,17.82715	-1376.07	18.88	19.53	-13	-13	19.53,21.51,22.95	0.51	17.11	1589,1592,1595,1598,1597,1598,1600,1602,1600,1598,1602,1596,1604,1598,1604,1603,1604,1604,1604,1538,1540,1522,1509,1507,1498,1493,1492,1481,1480,1478,1477,1470,1470,1466,1465,1462,1462,1465,1458,1472,1516,1526,1531,1534,1540,1548,1548,1557,1564,1566,1571,1570,1572,1574,1571,1571,1574,1574,1576,1580,1580,1580,1585,1590,1592,1594,1595,1596,1589,1590,1590,1589,1590,1592,1593,1590,1594,1598,1594,1593…	54.462	0.357	0.00015841909635663453,0.00012669543612723642,0.00009751170642235786,0.00007066454965265595,0.000045966889898205106,0.000023246629329123117,0.0000023454489962798045,-0.000016882294364221846,-0.000034570583200062126,-0.000050842672757011014,-0.00006581194994412145,-0.00007958272343453978,-0.00009225095050750074,-0.00010390490569627529,-0.00011462579590133397,-0.00012448832625494593,-0.000133561220…	0.00011	-0.0000010140429969101656,0.000023941892659256192,0.00003090648938475814,-0.000019374297437888644,0.00007264406735131176,0.00005343661386573036,-0.000014837416182335036,0.000046101890211843624,0.000020353166755397756,-0.00008879751731745839,0.00005227498005386091,0.00005760418504638749,7.78515862647108e-7,-0.0000020705817049193965,0.000044148547462801267,0.00005602055974403768,-0.0000318785749712…	0.00008008190625361731,0.000416539649385214,0.0017486799192017292,0.007023035271971034,0.027905839446277645,0.11058732012305209,0.4379488751059242,1.7340745226344798,6.865836846616646,27.18407111661827,107.63024492349884,426.1415286388182,1687.226214872879,6680.2505350896845,26449.17813718836,104720.47694793508,414620.7578752069,1641611.8207297237,6499648.9409934785,25734120.46758762	0.00015841909635663453,0.00012669543612723642,0.00009751170642235786,0.00007066454965265595,0.000045966889898205106,0.000023246629329123117,0.0000023454489962798045,-0.000016882294364221846,-0.000034570583200062126,-0.000050842672757011014,-0.00006581194994412145,-0.00007958272343453978,-0.00009225095050750074,-0.00010390490569627529,-0.00011462579590133397,-0.00012448832625494593,-0.000133561220…	0.698	0.222	0.079	0.999	0.16	0.71	-1.654	1.944	0.0004971889288333074,0.00041579178082941,0.000361535489684681,0.0002982450490816905,0.00028920431045216,0.00030728597591690715,0.00032536839423547226,0.00021688517587709473,0.00041579178082941,0.00021688517587709473,0.00041579178082941,0.000361535489684681,0.00041579178082941,0.00022592440914387672,0.00018976860485601766,0.00028920431045216,0.00023496383055356414,0.00030728597591690715,0.0003615…	none	0.643	37.173	620
2559550	7	1	8	7	32.48,32.48,32.49	20.4521	940.224	32.49	1566,1567,1568,1573,1578,1570,1570,1572,1568,1573,1578,1574,1573,1568,1571,1569,1566,1571,1578,1568,1568,1572,1569,1571,1569,1564,1573,1572,1572,1576,1568,1566,1569,1566,1573,1573,1574,1568,1565,1568,1567,1569,1578,1569,1564,1570,1573,1574,1566,1569,1567,1573,1576,1568,1570,1567,1568,1571,1574,1575,1566,1570,1570,1566,1574,1577,1568,1570,1567,1573,1574,1577,1575,1570,1573,1574,1576,1574,1570,1571…	0.00011057534021822542,0.00009717463634476382,0.00004279440723514871,0.00005174911004919268,0.000027177011349894214,0.000021231457026953694,0.00006371107258093697,0.00006521470955855295,0.0001486775148846168,0.00009057241176547446,0.000125602974589141,0.00007867850570313785,-0.000001757813405652352,0.00007423533885937633,0.00007201390986999708,0.000006479735561282124,0.00007129583754100865,0.0000…	0.0138	0.00059	0.0002449313065813647,0.00016075079899441672,0.000046798475230440125,-0.000037336090306673546,-0.00008050447278897576,-0.000019434620537129386,-0.00007377096030415052,-0.0001764807786995814,-0.00016753068942501907,-0.00007669952421139789,-0.00011241422324036634,-0.00021510564362065137,-0.0002135980021940815,-0.00013766885296666222,-0.00037798192921629755,-0.00032439969573954763,-0.000237331530933…	4807.19	1050	1569.33	0.782	72.491	25.53711,25.80859,26.26465	19.47461,19.73145,20.45215	181.492	22.611	25.23	-7.26	-7.26	25.23,25.23,25.23	0.96	25.75	1772,1774,1778,1778,1781,1782,1782,1783,1782,1787,1786,1785,1788,1788,1784,1785,1786,1782,1782,1700,1697,1682,1667,1654,1643,1632,1626,1618,1611,1606,1598,1593,1588,1584,1584,1577,1575,1573,1568,1589,1633,1642,1653,1662,1672,1676,1685,1686,1694,1699,1705,1708,1718,1722,1728,1734,1737,1738,1736,1737,1740,1742,1748,1746,1750,1756,1759,1754,1762,1761,1763,1764,1769,1769,1770,1770,1771,1773,1774,1778…	84.897	0.364	0.0001948091829543999,0.00015385075406110693,0.00011575637213038809,0.00008032576666297195,0.000047372671215177846,0.000016723844155474372,-0.000011781842104676343,-0.00003829424819379871,-0.00006295275563051168,-0.00008588699958266281,-0.00010721755038776434,-0.00012705654741763337,-0.0001455082886196009,-0.00016266977883363677,-0.00017863123976801437,-0.00019347658431456742,-0.00020728385769711…	0.00015	0.00011097187590885363,-0.000012582721553737823,0.00006252155574942977,0.0000813723730819414,0.00004220485966548271,0.000041716004222477706,0.00000431027975417053,0.00007765816489145125,0.000029701545677865448,0.00003976061652507465,0.00007267492129473431,0.0001038332760274509,0.000050600134167725185,0.000013194383736898077,0.00014280711513993616,0.00005616559449622009,0.0000046968744156761965,0.…	0.00009042005758794424,0.00006574233832777942,0.000045160495297981456,0.00002799471680616415,0.000013678022679038132,0.0000017375370886298983,-0.000008221130385071875,-0.000016526911343547493,-0.000023454143075337964,-0.000029231629828941417,-0.000034050200143960434,-0.00003806900985673059,-0.00004142079896669027,-0.000044216275996106637,-0.00004654777465715709,-0.0000484923036049106,-0.000050114…	0.0001948091829543999,0.00015385075406110693,0.00011575637213038809,0.00008032576666297195,0.000047372671215177846,0.000016723844155474372,-0.000011781842104676343,-0.00003829424819379871,-0.00006295275563051168,-0.00008588699958266281,-0.00010721755038776434,-0.00012705654741763337,-0.0001455082886196009,-0.00016266977883363677,-0.00017863123976801437,-0.00019347658431456742,-0.00020728385769711…	0.674	0.239	0.087	1	1.373	0.262	0.591	0.147	0.0005052097790096467,0.0002572975820239741,0.00008574892447381437,0.00004763620115816827,0.0003526316800696257,0.000104806540463186,0.00020010716666092566,0.00023823327342784712,0.0003144955295442957,0.00014292428147180653,-0.00002857921287559436,-0.00002857921287559436,0.0003144955295442957,0.00020010716666092566,0.00042891402899514447,0.00039077117969044936,0.00020010716666092566,0.00021916980…	none	0.577	42.72	620
2559549	7	1	7	7	32.43,32.43,32.43	20.498	940.174	32.43	1378,1379,1371,1368,1374,1370,1371,1373,1374,1374,1377,1368,1368,1372,1366,1369,1368,1369,1370,1374,1372,1366,1366,1365,1369,1371,1368,1373,1366,1365,1364,1368,1366,1368,1369,1365,1361,1364,1362,1365,1362,1364,1366,1366,1368,1370,1362,1365,1366,1365,1366,1368,1361,1365,1364,1361,1365,1366,1366,1362,1358,1357,1364,1365,1362,1364,1356,1355,1365,1361,1364,1365,1362,1355,1355,1358,1358,1358,1364,1360…	0.0000760980576033181,0.000008279110154702132,0.00009021913191771374,0.00007570276982349401,0.00008149380140849904,-0.000006623681516992137,0.000014394524962430934,0.00009886602671909434,0.000013287508082764004,0.00007998850435677154,0.00014415875274733785,0.00012456522219185417,0.0000288369676435069,0.00008538306686995114,0.00015462564485225965,0.0001401092354354038,0.00018143405054693923,0.0001…	0.0086	0.00053	0.0002325111934619095,0.00012916011585738398,-0.000029976171753018125,0.00004938712673477027,0.000050101668707138166,-0.0000075343948776093176,-0.000148854596584901,-0.00021660033379453073,-0.00022602286322039413,-0.00014670075259720343,-0.0002397958308221517,-0.0002771021671860522,-0.00020793428979980552,-0.0002883359896373736,-0.00029521981779515315,-0.00022352339969475366,-0.000308986355150212…	4143.6	924	1372.67	0.777	116.594	25.0166,25.59766,26.08008	19.91211,20.00977,20.49805	429.204	26.584	25.05	-7.38	-7.38	25.05,25.19,25.23	0.2	26.32	1582,1590,1588,1590,1590,1590,1590,1594,1586,1589,1588,1588,1590,1590,1589,1594,1594,1590,1593,1509,1506,1486,1473,1461,1449,1439,1437,1428,1422,1414,1412,1403,1398,1396,1394,1389,1389,1386,1388,1406,1457,1462,1475,1486,1494,1502,1504,1512,1521,1526,1528,1532,1541,1540,1547,1539,1545,1546,1550,1554,1553,1553,1558,1560,1569,1571,1573,1572,1578,1570,1573,1574,1576,1576,1582,1584,1588,1589,1588,1589…	87.427	0.401	0.00022272388383247886,0.00016438436663789198,0.00011246530608661538,0.00006626010970941186,0.00002513994787313532,-0.000011454804276339527,-0.00004402218302872722,-0.00007300541413435697,-0.00009879894488514724,-0.00012175381234513633,-0.0001421824207895045,-0.00016036279337064554,-0.00017654235587433745,-0.00019094130406104422,-0.0002037556004201798,-0.00021515964112166325,-0.000225308629460642…	0.00017	0.00006899102463851348,0.000013392273300347925,0.000042455574839718434,0.00002669853583578647,0.000005962364155748035,-0.00003469023851227041,0.00003420821801848179,0.000025091468957568522,0.000055815278958838566,-0.000041275770851003004,0.000057501710359633045,0.00008988777884595301,-0.000030447473443028358,0.000028490780735161925,-0.000030420799360205944,0.000008598129296156506,0.00003932032728…	0.00008505674460514049,0.00002569379426815007,-0.000012953112706987904,-0.00003811330791740488,-0.00005449328428740338,-0.0000651570976496552,-0.00007209953229401914,-0.00007661924744224895,-0.00007956170582573863,-0.00008147732684489947,-0.00008272444860867403,-0.00008353635904300485,-0.00008406493497883017,-0.00008440905239390428,-0.00008463308225854878,-0.00008477893183794836,-0.00008487388390…	0.00022272388383247886,0.00016438436663789198,0.00011246530608661538,0.00006626010970941186,0.00002513994787313532,-0.000011454804276339527,-0.00004402218302872722,-0.00007300541413435697,-0.00009879894488514724,-0.00012175381234513633,-0.0001421824207895045,-0.00016036279337064554,-0.00017654235587433745,-0.00019094130406104422,-0.0002037556004201798,-0.00021515964112166325,-0.000225308629460642…	0.669	0.237	0.095	1.001	0.314	0.097	-0.012	0.916	0.00023129841912206597,0.00021264075353066842,0.00025928642050037336,0.00014734523543953512,0.0002966065616166632,0.00025928642050037336,0.00025928642050037336,0.00022196948613273268,0.00031526783487779997,0.0002686161551251785,0.00038058860665834927,0.00031526783487779997,0.00023129841912206597,0.0003712564663001593,0.00042725231662851446,0.00040858623097018125,0.00025928642050037336,0.000259286…	none	0.579	34.746	620
2559548	7	1	6	7	32.37,32.37,32.38	19.8369	940.157	32.38	1536,1536,1536,1538,1537,1537,1542,1544,1543,1541,1540,1533,1545,1536,1537,1536,1535,1533,1539,1539,1540,1533,1533,1535,1533,1538,1535,1538,1539,1539,1533,1533,1533,1533,1533,1533,1529,1531,1531,1530,1533,1533,1531,1531,1530,1535,1538,1539,1527,1527,1533,1534,1537,1532,1527,1527,1531,1531,1529,1531,1533,1532,1534,1531,1529,1529,1528,1533,1532,1539,1525,1529,1525,1525,1529,1531,1533,1531,1530,1535…	-0.000011553659590759743,-0.000014893137044841248,-0.000027258208896304652,0.00009577707877073076,-0.00011515577542445203,0.0000620118496163606,0.00016700769648074758,0.00016366476983262972,0.00010615251326903387,0.0000667024809175716,0.0002078106173765545,0.0002767079594751879,0.00036367917170614653,0.000053340318618173675,0.00008610476692765971,0.00008276387202794404,0.00005234540497143141,0.00…	0.0135	0.00062	0.00006606109499475778,0.00016200985267076867,0.000059380776222918275,-0.000070288927139386,-0.00013677594636396005,-0.0002844166303023531,-0.0001254063832411767,-0.00020090078114868708,-0.00022227250321708557,-0.0001985506243054961,-0.0003912359225800151,-0.0002503092802827982,-0.0002806937058314527,-0.0003831976828785482,-0.0003144070254270505,-0.00032675431736399425,-0.0005193659558958241,-0.0…	4281.94	1072	1536.67	0.75	74.154	24.85645,25.04199,25.33789	19.93359,19.82422,19.83691	439.14	21.454	24.71	-7.67	-7.67	24.71,25.23,25.47	0.62	27.29	1893,1901,1903,1905,1907,1907,1907,1909,1909,1909,1908,1915,1909,1907,1911,1913,1909,1911,1913,1808,1793,1758,1738,1725,1704,1693,1679,1667,1654,1649,1640,1632,1622,1618,1610,1612,1611,1603,1602,1640,1691,1717,1735,1751,1768,1776,1791,1799,1799,1805,1811,1813,1824,1828,1829,1833,1838,1841,1845,1845,1860,1853,1854,1859,1859,1861,1871,1873,1875,1881,1880,1881,1885,1877,1880,1880,1879,1884,1882,1879…	94.608	0.63	0.00012736998167222474,0.00008300796135713286,0.00004181655208441515,0.000003569146176814718,-0.00003194466809876647,-0.0000649202640763709,-0.00009553905150484147,-0.0001239694745433388,-0.000150367938428827,-0.00017487966991343372,-0.00019763951620523822,-0.00021877268680772603,-0.0002383954423390177,-0.0002566157341202948,-0.0002735337980520135,-0.00028924270604501455,-0.00030382887804013996,-…	0.00014	0.000007806355110639803,-0.000011989720599648508,-0.000022853787015403425,0.000018085252716371647,-0.00009459056690981895,0.000024937997835540593,0.000021218651132412964,-0.000046806716443604786,0.000010207266992236883,0.000020779211554422945,0.0000099143071253481,-0.00007061192557852985,0.00004892353012059808,0.00007200273918981135,-0.000022825299515800663,0.000012754685358171642,0.0000554838430…	0.00006850420274335225,0.00001821983898861687,-0.00001419297844096907,-0.00003508596893097472,-0.00004855338973028542,-0.000057234359698297767,-0.00006283002947861602,-0.00006643694442081068,-0.00006876192711474785,-0.0000702605886062823,-0.00007122661139521103,-0.00007184930039736467,-0.0000722506797414618,-0.00007250940500770327,-0.00007267617682687174,-0.00007278367633812087,-0.000072852969489…	0.00012736998167222474,0.00008300796135713286,0.00004181655208441515,0.000003569146176814718,-0.00003194466809876647,-0.0000649202640763709,-0.00009553905150484147,-0.0001239694745433388,-0.000150367938428827,-0.00017487966991343372,-0.00019763951620523822,-0.00021877268680772603,-0.0002383954423390177,-0.0002566157341202948,-0.0002735337980520135,-0.00028924270604501455,-0.00030382887804013996,-…	0.641	0.22	0.139	1	0.825	0.165	0.516	0.319	0.00038615534992025424,0.0002475433538811615,0.00042312602176545875,0.0002752622140968975,0.00007203164433481146,0.0002105876254010747,0.0000997393044156779,0.00012744873233712053,0.0001828728926041002,0.00038615534992025424,0.00031222344662162465,0.0001828728926041002,0.0004416125379714378,0.0003307052425647307,0.0002567827773814268,0.00031222344662162465,0.00035842941126852055,0.000256782777381…	none	0.597	63.515	620
2559547	7	1	5	7	32.23,32.24,32.25	21.0264	940.167	32.25	1488,1485,1487,1491,1485,1489,1491,1491,1491,1489,1486,1484,1484,1485,1487,1487,1487,1485,1485,1484,1486,1485,1485,1489,1489,1489,1491,1489,1485,1482,1481,1481,1484,1481,1485,1489,1485,1484,1485,1486,1487,1485,1487,1480,1483,1481,1480,1480,1481,1481,1483,1477,1475,1483,1481,1480,1477,1485,1484,1484,1485,1485,1485,1489,1479,1477,1477,1481,1479,1480,1477,1480,1487,1485,1477,1479,1480,1479,1480,1479…	0.00003857787562442156,0.00011437652317803123,0.0000031608037726329505,-0.000010703878919587273,0.00004715173998967492,0.0001434438341661511,0.00009114444755660135,0.00006702985901354026,0.00016332164991379874,0.00010589838774347639,0.0000228712910993877,0.00006023282001790454,0.0001590792908960817,0.00012727681072316024,0.000003272907835109462,0.00008929537733922207,0.00007542938057028117,0.0000…	0.0127	0.00058	0.00017108957232040353,0.00012904403483183485,0.00008188157693928255,0.000014239727481113654,-0.00009947150345472326,-0.00006980700616359103,-0.00013997949411185016,-0.00009239912995346807,-0.00012929141004720644,-0.00017385752054886768,-0.00023377166073206828,-0.00027320677569638203,-0.00022052473515377557,-0.00026763601530958023,-0.0003454394469025556,-0.0003516068214400012,-0.00025032531178086…	4594.32	1010	1487.67	0.78	78.655	26.56152,26.67285,26.69727	20.52539,20.67285,21.02637	93.0354	12.358	21.81	-10.44	-10.44	21.81,23.11,23.99	0.59	28.41	1645,1645,1645,1645,1645,1645,1648,1647,1647,1646,1651,1649,1648,1650,1649,1647,1651,1653,1652,1564,1554,1530,1518,1508,1496,1484,1481,1475,1464,1461,1457,1454,1445,1446,1446,1445,1438,1434,1441,1466,1523,1536,1553,1564,1563,1568,1571,1579,1586,1588,1595,1596,1600,1605,1605,1605,1613,1615,1618,1617,1619,1622,1626,1625,1625,1626,1629,1633,1629,1636,1633,1635,1637,1639,1637,1641,1641,1645,1643,1645…	93.405	0.375	0.00018118564218985072,0.00013759337587124568,0.00009729846800869376,0.00006005150342592826,0.000025621932936226405,-0.000006203353698106429,-0.000035621346863615037,-0.00006281413641581659,-0.00008795003876884653,-0.00011118463873102295,-0.00013266175253502747,-0.00015251431802361162,-0.00017086521750085126,-0.00018782803834218776,-0.0002035077760712379,-0.00021800148425523747,-0.000231398875241…	9e-05	0.000047393102301511844,-0.0000420168027197165,0.00002485055664848625,0.00007676243384304301,0.00002558539457568873,0.00001930236084408064,0.00008119034832558993,0.000026687649135287522,0.00005698336206408002,0.00011721355805286884,0.00007268311739076328,0.000009868818946565318,0.00006510404161085565,-0.00004591956665111426,0.00004588614169752402,0.00007618299828986279,-0.00003650554390946238,0.0…	0.000022699842176164778,0.000014318265054084835,0.0000066812967416312935,-2.77212874867457e-7,-0.000006617537215868844,-0.00001239459508667795,-0.000017658426374748306,-0.000022454625486630825,-0.000026824736278927034,-0.00003080661190407132,-0.00003443474268786487,-0.000037740554878780145,-0.000040752682856751604,-0.00004349721715927845,-0.000045997930473199236,-0.00004827648354964035,-0.0000503…	0.00018118564218985072,0.00013759337587124568,0.00009729846800869376,0.00006005150342592826,0.000025621932936226405,-0.000006203353698106429,-0.000035621346863615037,-0.00006281413641581659,-0.00008795003876884653,-0.00011118463873102295,-0.00013266175253502747,-0.00015251431802361162,-0.00017086521750085126,-0.00018782803834218776,-0.0002035077760712379,-0.00021800148425523747,-0.000231398875241…	0.676	0.235	0.088	0.999	0.483	0.311	0.794	-0.105	0.0002088348714146745,-0.00018264817271337487,0.00015288711199392747,-0.00003355338280008303,-0.00010810717585096384,-0.0000894699274025102,-0.00014537927353117086,-0.00007083187912369005,-0.00010810717585096384,-0.00010810717585096384,0.00004101321083343808,-0.00003355338280008303,0.00002237036213011913,0.000059656859848076433,-0.000005592410491859953,-0.0000521930309457438,-0.000145379273531170…	none	0.588	34.425	620
2559546	7	1	4	7	32.14,32.15,32.15	18.8623	940.143	32.15	1841,1845,1845,1854,1856,1852,1854,1858,1862,1851,1851,1850,1852,1853,1853,1851,1849,1851,1851,1850,1849,1857,1854,1854,1856,1857,1850,1853,1852,1850,1850,1854,1852,1853,1853,1854,1856,1854,1854,1850,1856,1854,1854,1855,1856,1856,1858,1861,1861,1860,1860,1862,1862,1861,1862,1858,1859,1856,1856,1860,1861,1859,1862,1865,1866,1868,1862,1866,1870,1863,1862,1862,1862,1864,1870,1870,1866,1862,1865,1864…	0.0000781644921116254,-0.00005365394028547586,-0.00005597657305531016,0.00008043298668355791,0.00009352259462520867,-0.000010542602927375337,0.00007345168937559444,0.00017287544839535753,0.00006879825479447755,0.00012196517307896659,0.00019055291262080616,0.00007723227785660237,0.00008723608067905056,0.00010957015370899071,0.0000979948824363809,0.0001727351159499834,0.00025365056272871493,0.00012…	0.018	0.0009	0.0003183200918475727,0.00021116173343389719,0.00012869159748724534,0.00011711837874088376,0.000016187379814848717,0.000023106710874572588,0.000030025735353610924,-0.000052392147837094863,-0.00019945576453250238,-0.00014018675586843925,-0.00017945485006856324,-0.00024642449291551783,-0.0002856774199782489,-0.0003064574406093936,-0.0004226321368089067,-0.00033877839285115333,-0.0003533978663766785…	4684.27	1017	1848	0.783	55.561	25.43457,25.8418,26.44629	18.04395,18.36133,18.8623	79.784	26.589	20.09	-12.06	-12.06	20.09,21.61,22.63	0.5	24.47	2317,2322,2326,2325,2330,2329,2334,2336,2335,2336,2339,2340,2338,2341,2340,2344,2340,2344,2349,2220,2204,2173,2143,2110,2092,2072,2054,2037,2024,2005,1991,1982,1974,1961,1947,1934,1928,1916,1910,1942,2014,2046,2070,2088,2111,2124,2136,2150,2157,2166,2174,2188,2196,2207,2216,2222,2232,2241,2245,2248,2262,2270,2265,2268,2275,2284,2289,2292,2293,2300,2302,2307,2308,2312,2314,2314,2320,2321,2317,2326…	89.868	0.353	0.0003033451904335329,0.0002547371047119067,0.0002087560695271418,0.0001652601044983866,0.0001241149026520057,0.00008519341570809664,0.000048375461780422627,0.000013547354278418814,-0.000019398449134611453,-0.00005056367861105027,-0.0000800445662416415,-0.00010793214320123379,-0.00013431252083512084,-0.00015926715655391587,-0.00018287310535799317,-0.00020520325776815317,-0.00022632656489719548,-0…	0.00027	-0.000004305492300191735,0.000049172901901399656,0.000049578629656202204,0.00003628756423084351,0.000041829537906614476,0.00006791740912765738,-0.000010430629243401925,0.00007044105819961441,0.000026331856062990456,0.00009864857844272423,0.00002714330588698623,0.000051518039668760095,0.0000245307179758066,0.00006773883472685229,0.000013358250586754394,0.00004115626317477701,0.00006381949328969051…	0.00007305646989191921,0.000052082576389261956,0.00003271705032552072,0.000014836555238715497,-0.0000016727873681902125,-0.000016916123304303303,-0.00003099053535048638,-0.00004398566156668744,-0.00005598426618483166,-0.00006706276672321565,-0.00007729172067952634,-0.00008673627490216728,-0.00009545658050187854,-0.00010350817594616747,-0.00011094234077642765,-0.00011780642220052335,-0.00012414413…	0.0003033451904335329,0.0002547371047119067,0.0002087560695271418,0.0001652601044983866,0.0001241149026520057,0.00008519341570809664,0.000048375461780422627,0.000013547354278418814,-0.000019398449134611453,-0.00005056367861105027,-0.0000800445662416415,-0.00010793214320123379,-0.00013431252083512084,-0.00015926715655391587,-0.00018287310535799317,-0.00020520325776815317,-0.00022632656489719548,-0…	0.605	0.292	0.103	1	0.18	-0.748	-7.068	8.816	0.0019558611898173165,0.001729734843630023,0.001710896294951018,0.0015413861192349481,0.0014660694952606107,0.0015602173162851862,0.0015131408545626952,0.0016449678090167063,0.00161671580710486,0.0016732216489154482,0.00161671580710486,0.0015978821601492549,0.0015790493298996867,0.0013907659306516358,0.0015602173162851862,0.0015225557386781398,0.0017014773270401737,0.0015790493298996867,0.0015790…	none	0.426	39.65	620
2559545	7	1	3	7	32.07,32.09,32.1	18.543	940.184	32.1	1196,1198,1202,1200,1201,1200,1204,1202,1204,1198,1196,1205,1200,1203,1202,1204,1206,1198,1198,1196,1196,1198,1198,1195,1198,1198,1200,1197,1198,1198,1196,1198,1198,1198,1201,1198,1198,1196,1202,1202,1204,1202,1205,1202,1198,1197,1198,1197,1198,1198,1197,1200,1200,1204,1204,1204,1202,1204,1198,1200,1199,1198,1198,1204,1204,1205,1204,1204,1206,1207,1200,1203,1200,1200,1200,1198,1204,1204,1205,1203…	0.00001531352992838219,-0.00002807908955665299,-0.000012173587117704307,0.00003512726269634529,0.000009173934955135746,0.00006345382307814746,0.0000061042528582708685,-0.000009382899175708632,0.00012164668460655913,0.0001933869316999256,0.000024382204410332134,-0.000025985132036291354,0.0000875931617898784,0.00011047933286585773,0.000025218932231917168,0.00006903258633100417,0.0000535435340532657…	0.0102	0.00034	0.00016602090656958057,0.0001470392272650783,-0.0000079871465079572,0.00012652286694925634,-0.000011056304464746467,-0.00008233966941206162,-0.00003505103813569125,-0.00010632971614300155,-0.00003114471272487174,0.0000091729034997323,-0.00010047026755446504,-0.0001298984322949959,-0.0001174851288309827,-0.00012947886549872093,-0.00015890453728894684,-0.00013951906625016554,-0.00020031925091451344…	4414.11	968	1200	0.781	97.807	24.74219,24.90332,25.00098	19.4082,18.9082,18.54297	-9275.92	13.885	25.95	-6.15	-6.15	25.95,26.01,26.05	0.64	19.12	1355,1358,1360,1356,1361,1358,1361,1361,1361,1365,1364,1365,1364,1362,1362,1362,1366,1361,1364,1316,1324,1314,1310,1306,1302,1298,1297,1296,1294,1293,1292,1290,1285,1284,1285,1284,1280,1281,1280,1286,1320,1328,1332,1334,1339,1334,1334,1338,1345,1340,1349,1348,1348,1356,1354,1354,1358,1360,1360,1360,1363,1354,1353,1356,1356,1358,1357,1358,1357,1356,1360,1358,1366,1365,1366,1366,1366,1369,1370,1365…	58.366	0.371	0.00015995651459127595,0.0001285586586182071,0.00010008633685058881,0.00007426695900726929,0.00005085333374491805,0.000029621302080466076,0.000010367591322347401,-0.000007092131035638441,-0.000022925022089608898,-0.00003728266386575306,-0.0000503025145468064,-0.00006210922447869676,-0.00007281582955663774,-0.00008252483341599123,-0.0000913291887886534,-0.0000993131874203407,-0.0001065532670687284…	4e-05	0.000012067489126273779,0.000019635279563961076,-0.00003132585559789038,-0.00004441474234540985,-0.000011027534979411222,0.000005147209263682872,0.00005059002243963575,-0.000015868245556188492,-0.00004444970001330654,0.00004402738553811738,-5.1644549193212036e-8,-0.00005961796464770114,-0.00003311682579513282,0.00006397211326458254,9.537129128408413e-7,0.00002057248017614325,-0.000023504858812737…	-0.00004287414677308773,0.43502195176646685,4645.955316061516,49608423.4100561,529707124051.78503,5656088583009938,60394388910895284000,6.448771369806646e+23,6.885847001679862e+27,7.3525461225904595e+31,7.85087651114392e+35,8.382982026301992e+39,8.951151830442158e+43,9.557830237526355e+47,1.020562722874284e+52,1.0897329680864202e+56,1.1635913355623518e+60,1.2424555701690073e+64,1.326664952431933e…	0.00015995651459127595,0.0001285586586182071,0.00010008633685058881,0.00007426695900726929,0.00005085333374491805,0.000029621302080466076,0.000010367591322347401,-0.000007092131035638441,-0.000022925022089608898,-0.00003728266386575306,-0.0000503025145468064,-0.00006210922447869676,-0.00007281582955663774,-0.00008252483341599123,-0.0000913291887886534,-0.0000993131874203407,-0.0001065532670687284…	0.728	0.198	0.074	1	0.345	0.836	-1.985	2.148	0.0009867221095515072,0.0008834427303760547,0.000733262009381494,0.0009303848580202945,0.0007520317596611323,0.0006769576253047803,0.000611278401792178,0.0006018964663644565,0.0008365056760756177,0.0007801879061849384,0.0006300428806951935,0.0007238774384362547,0.0008177322746460125,0.0006769576253047803,0.0006488081703865683,0.0006581911192996603,0.0008365056760756177,0.000798959684705822,0.0007…	none	0.752	42.786	620
2559544	7	1	2	7	32,32.01,32.02	19.833	940.16	32.02	1776,1780,1781,1784,1782,1788,1788,1781,1779,1782,1780,1780,1782,1778,1782,1786,1784,1783,1782,1785,1786,1786,1782,1780,1775,1779,1782,1778,1782,1778,1776,1778,1779,1778,1778,1781,1782,1782,1782,1783,1784,1782,1782,1781,1781,1785,1780,1784,1781,1785,1786,1786,1784,1780,1778,1779,1780,1780,1778,1787,1778,1778,1778,1779,1780,1781,1780,1778,1782,1782,1786,1781,1781,1779,1778,1774,1780,1779,1781,1778…	-0.000006365472340260589,-0.00006611603340890391,0.000028819286653480883,0.0000628965726573768,0.00013248535412990314,0.00011076234232699295,0.00005353634671436125,0.00007746705884008194,0.0001343687891687202,0.00010757565510804247,0.00006303477795941236,0.00006160554340199519,-6.74382647366318e-7,0.00010438965157509437,0.00014860512650499827,0.00008124417614442897,0.00022943358808448874,0.000248…	0.0176	0.00085	0.00025920481299805844,0.00014619223676921002,0.00010166024045202702,0.00011544141676804567,0.00004049792631490566,-0.000047099672813703335,-0.00006626328679823471,-0.0000651542538824792,-0.00024644424867003277,-0.0002402655834767101,-0.00018849565191498852,-0.00022031078708563488,-0.00033062209463871465,-0.00040799120041827607,-0.00036890086074497694,-0.00030702184908858415,-0.000313503140022352…	4431.59	988	1781.67	0.777	56.824	25.52539,25.91895,26.03027	18.77051,19.20996,19.83301	96.3558	21.671	19.13	-12.89	-12.89	19.13,20.81,21.91	0.35	23.22	2310,2314,2321,2320,2322,2324,2326,2329,2326,2329,2333,2333,2331,2334,2338,2336,2338,2341,2339,2216,2197,2163,2126,2100,2076,2058,2037,2017,2005,1984,1969,1956,1942,1930,1922,1908,1901,1884,1878,1922,1994,2030,2050,2076,2086,2104,2118,2128,2146,2159,2165,2181,2189,2198,2200,2210,2221,2228,2236,2241,2246,2250,2257,2264,2270,2274,2278,2286,2287,2292,2292,2297,2293,2294,2298,2306,2308,2309,2316,2318…	86.301	0.4	0.00025486242528575747,0.0002080158679986342,0.00016375709559581018,0.00012194315988652796,0.00008243900908029285,0.000045117051592915604,0.00000985674394773158,-0.00002345579855900931,-0.00005492816968606553,-0.00008466201975646274,-0.00011275338397047986,-0.0001392929925827604,-0.00016436656394536343,-0.00018805508136323653,-0.00021043505465630425,-0.00023157876727297126,-0.00025155450975317725…	0.00022	-0.0000012621331891286594,0.00001636546129337461,-0.000016820523167174396,0.00007457420285034229,0.00007744983125650965,0.000009834975378388257,0.00003565943568852613,0.00005492801264956506,0.00009551057554579531,0.00001805725278928365,0.000032407236471694693,0.00000905477630769577,0.000039797220131509475,0.000008248312216692071,0.00009637021608197551,-0.00000239316587055831,0.0000824477760362003…	0.00006771823408871193,0.00004730828416784323,0.00002877317563380679,0.000011940687082855506,-0.00000334558277079091,-0.000017227668318105558,-0.000029834556786517024,-0.000041283386741733,-0.000051680536496161414,-0.00006112261253702016,-0.0000696973471582452,-0.00007748441363666219,-0.00008455616652673852,-0.00009097831395246194,-0.00009681052814303453,-0.00010210699988525475,-0.000106916942044…	0.00025486242528575747,0.0002080158679986342,0.00016375709559581018,0.00012194315988652796,0.00008243900908029285,0.000045117051592915604,0.00000985674394773158,-0.00002345579855900931,-0.00005492816968606553,-0.00008466201975646274,-0.00011275338397047986,-0.0001392929925827604,-0.00016436656394536343,-0.00018805508136323653,-0.00021043505465630425,-0.00023157876727297126,-0.00025155450975317725…	0.598	0.287	0.115	1	0.435	0.367	-0.52	1.153	0.000496263084296663,0.0005514384478582584,0.00029401336954579997,0.0004502889687715052,0.0003215873305863116,0.0004319006851755898,0.0005054584914451816,0.0007722100269088369,0.0005698317935571354,0.0005698317935571354,0.0006250165051123087,0.0005698317935571354,0.000606620822118206,0.0003675478231422758,0.0005054584914451816,0.00034916304244720666,0.0005330458811259033,0.000496263084296663,0.00…	none	0.427	35.415	620
2559543	7	1	1	7	31.86,31.87,31.88	17.6064	940.168	31.88	1280,1281,1283,1283,1281,1285,1285,1275,1276,1274,1277,1273,1275,1277,1282,1279,1279,1283,1279,1277,1277,1281,1281,1278,1280,1277,1279,1279,1277,1277,1277,1283,1277,1277,1283,1271,1271,1274,1273,1273,1274,1274,1273,1275,1273,1280,1277,1277,1280,1275,1277,1281,1279,1275,1275,1277,1273,1277,1276,1275,1276,1277,1276,1276,1280,1272,1272,1272,1269,1269,1274,1277,1275,1269,1269,1273,1273,1273,1271,1272…	0.00010765035590800504,-0.000027149578390977295,0.000036864490278958,0.00009023474110415712,0.000143610650800767,0.00006560680690256646,0.000026667320504685404,0.000055181967689293645,0.00013340754435087386,0.00010511413132780564,-0.0000048276114507756,0.00017635670381474795,0.00008770000447130258,0.00007361166039341207,0.00016248913917907436,-0.000007809015309267015,0.0001769174244651526,0.00018…	0.008	0.00037	0.00014895982031722674,0.00004966611030713491,-0.00004605424489796142,-0.0000033505685876354545,-0.00010970256521175937,-0.00009894279281934281,-0.000059793732135920874,-0.00010226242928809667,-0.00019794318599270587,-0.0002226601276630074,-0.0002863917500686241,-0.0001869550168178779,-0.00020102988262662037,-0.0001689868611570419,-0.00010855791506137892,-0.00020777888680200367,-0.000310521955857…	4279.54	957	1282.33	0.776	125.761	24.6377,25.03418,25.3916	16.6543,17.03223,17.60645	0.6816	17.329	20.09	-11.79	-11.79	20.09,21.33,22.29	1.04	31.03	1422,1426,1429,1425,1429,1431,1432,1431,1433,1429,1434,1431,1431,1429,1436,1433,1431,1431,1434,1368,1363,1354,1344,1338,1332,1328,1322,1319,1318,1318,1314,1310,1305,1306,1306,1302,1302,1302,1300,1322,1363,1373,1385,1389,1388,1393,1393,1395,1397,1402,1408,1406,1403,1408,1409,1413,1412,1414,1412,1416,1419,1415,1425,1420,1418,1421,1425,1421,1429,1433,1432,1429,1429,1425,1425,1427,1428,1434,1434,1435…	98.523	0.406	0.00012341547735173982,0.00007965007678573338,0.000041056635494646416,0.000007023959192684851,-0.000022986918757750258,-0.00004945127282043681,-0.00007278821208332425,-0.0000933673175800867,-0.00011151449524876943,-0.00012751713721931323,-0.00014162867316792205,-0.00015407258381689055,-0.00016504594014064193,-0.00017472252432746235,-0.00018325558192278988,-0.0001907802487390358,-0.000197415690966…	0.00326	0.00006509056245580063,0.000022906222156579584,0.0000662120795081308,-0.00005974045450546299,0.00004681542100090594,-0.000022720266419388455,-0.0000956631402157315,0.0000416585113285901,0.00006444697924225118,-0.00010765460009700278,0.000053599574218995906,0.00002680405475422506,0.00005130144866382206,-0.000023362808425249806,0.00003532521158556038,-0.00006326764108852014,0.00003986620186640415,0…	-0.000022927540932284485,-0.000025150155227666483,-0.00002737125502225461,-0.000029590841348038893,-0.00003180891523630377,-0.00003402547771763154,-0.00003624052982190368,-0.000038454072578297804,-0.00004066610701529156,-0.000042876634160662636,-0.000045085655041486594,-0.0000472931706841386,-0.00004949918211429776,-0.000051703690356940616,-0.000053906696436348094,-0.000056108201376100716,-0.0000…	0.00012341547735173982,0.00007965007678573338,0.000041056635494646416,0.000007023959192684851,-0.000022986918757750258,-0.00004945127282043681,-0.00007278821208332425,-0.0000933673175800867,-0.00011151449524876943,-0.00012751713721931323,-0.00014162867316792205,-0.00015407258381689055,-0.00016504594014064193,-0.00017472252432746235,-0.00018325558192278988,-0.0001907802487390358,-0.000197415690966…	0.7	0.213	0.086	0.999	-1.195	-0.344	1.594	-0.25	0.00022479155190028796,0.00011331012357278296,0.00015046742013063758,0.0002991284055035794,0.00015046742013063758,0.0002991284055035794,0.0004106575488754184,0.0003734779852962232,0.0003920673692221562,0.000466432862880462,0.0004106575488754184,0.0003827725777975364,0.00026195838820052003,0.0002991284055035794,0.0002991284055035794,0.0002991284055035794,0.00026195838820052003,0.000215500339793071…	none	0.673	42.349	620
2559560	8	1	8	8	32.78,32.78,32.78	18.3633	940.138	32.78	1227,1220,1222,1226,1218,1226,1218,1222,1228,1220,1224,1219,1225,1222,1222,1224,1222,1217,1225,1226,1221,1222,1218,1221,1226,1216,1222,1218,1222,1226,1214,1220,1222,1216,1221,1224,1214,1222,1214,1222,1220,1216,1214,1222,1222,1214,1217,1222,1214,1218,1217,1210,1214,1218,1222,1214,1220,1216,1214,1216,1219,1213,1218,1214,1214,1217,1213,1214,1218,1222,1210,1218,1221,1212,1218,1210,1214,1221,1212,1217…	0.00009683126514191741,-0.000029346317848062462,-0.000004792368260848701,0.000012098551302383858,0.00003665398555458451,-0.00002820086077474394,0.00004233498065928753,0.00010010550838139267,0.00010933340724376222,0.00006746214758995627,0.000028150264012793188,0.00007058790601884551,0.000013395161314301233,-0.0000029221265035219087,0.000016521466888184235,0.0000768391347444395,-0.00004420657623809…	0.0098	0.00033	0.0001894056408915197,0.00009643389115259374,0.000021362993044369178,0.0000791221668530626,-0.000026591940022076912,-0.00006588883112453985,-0.00002601937447088962,-0.00010361776725185364,-0.00011482070747878084,-0.00008517023985799691,-0.000024874306235796215,-0.000015649889371666033,-0.00007792644528919625,-0.00016061646324057205,-0.0001539468137277489,-0.0001855692462991993,-0.0001737944272183…	4020.79	934	1222.67	0.768	102.263	24.87402,24.99805,25.05957	17.73926,18.04492,18.36328	-853.384	27.308	20.81	-11.97	-11.97	20.81,22.63,23.67	0.51	23.3	1390,1390,1386,1386,1386,1388,1384,1390,1388,1388,1385,1387,1388,1386,1387,1391,1386,1390,1390,1334,1342,1332,1324,1312,1308,1306,1306,1307,1307,1304,1306,1304,1301,1294,1293,1292,1292,1288,1288,1307,1339,1352,1349,1353,1360,1362,1366,1366,1366,1366,1368,1377,1378,1381,1382,1381,1374,1377,1378,1382,1376,1378,1382,1381,1382,1379,1380,1386,1387,1387,1392,1390,1384,1382,1382,1387,1388,1388,1393,1394…	74.406	0.477	0.00015519173889575244,0.00012283005283400883,0.000093614188829642,0.00006723834710455038,0.00004342645413424128,0.00002192927301148477,0.0000025217947063863218,-0.000014999117082562148,-0.00003081685213758318,-0.00004509697324570132,-0.0000579889491293024,-0.00006962771892158846,-0.00008013510456215111,-0.00008962108589607834,-0.00009818495182294069,-0.00010591633954462724,-0.0001128961727897451…	0.00013	-0.000012404106594227458,0.00003383323729720141,-0.0000304403080947583,0.000012591870091234781,-0.000010040246111568559,0.00006022395532493567,0.000023174033588855244,0.000053397137837673584,0.00010604956249972963,1.2172108391556659e-7,0.000027139854233439433,-0.00001791506692804437,0.000020313508328864113,0.00008417523411440481,-0.000060182238102793796,0.00006293133008463412,0.000057916058161137…	0.0001062957239340971,0.000287356648759537,0.0007124111034273197,0.0017102591460522573,0.004052784216042754,0.009552042088111903,0.02246197314111752,0.05276902977867966,0.12391717753106851,0.29094292962346785,0.6830487362162334,1.603547291904279,3.7644884888393793,8.837464245027176,20.74666522623371,48.7044310085309,114.33743768725427,268.4159716886001,630.1271874525416,1479.2721021379698	0.00015519173889575244,0.00012283005283400883,0.000093614188829642,0.00006723834710455038,0.00004342645413424128,0.00002192927301148477,0.0000025217947063863218,-0.000014999117082562148,-0.00003081685213758318,-0.00004509697324570132,-0.0000579889491293024,-0.00006962771892158846,-0.00008013510456215111,-0.00008962108589607834,-0.00009818495182294069,-0.00010591633954462724,-0.0001128961727897451…	0.696	0.206	0.098	1	-0.977	-1.548	1.656	0.893	-0.0005981796583316202,-0.0007771152143643003,-0.0009202105968461353,-0.0008307815081493825,-0.0008665553534664272,-0.0007502795804135704,-0.000848668799154756,-0.0010453803917762833,-0.0008307815081493825,-0.001009621274267133,-0.0007771152143643003,-0.0009380942049897767,-0.0008933838037660152,-0.0007592249759772406,-0.000884441171145124,-0.0009559770767430483,-0.0008128934803896497,-0.00092915…	none	0.692	33.07	620
2559559	8	1	7	8	32.78,32.78,32.78	20.7344	940.12	32.78	1274,1266,1273,1274,1268,1274,1267,1268,1269,1274,1266,1270,1265,1266,1269,1270,1268,1270,1272,1262,1272,1266,1268,1273,1266,1267,1270,1262,1269,1270,1264,1266,1264,1270,1268,1264,1268,1270,1262,1268,1270,1264,1268,1266,1266,1270,1262,1268,1265,1261,1269,1265,1268,1266,1262,1261,1262,1264,1268,1261,1260,1264,1262,1269,1262,1264,1266,1265,1262,1265,1264,1268,1268,1259,1266,1266,1261,1265,1260,1261…	-0.0000035539969392348456,0.00002741425293543654,0.00001720673590829467,0.0000026654653181921256,0.000007627992790018752,-0.00003074878939577755,-0.00003662069646961005,0.000024682632408802014,0.00004698242006951346,-0.0000022319575378076756,0.00015227594564042743,0.00015940671299022427,0.00004299367782952938,0.00007179529280147405,0.0001699603661662265,0.000142408436019314,-0.0000303349386034935…	0.0065	0.00035	0.0001520493872014379,0.00009415711316157958,0.00011212332439081867,-0.00003676835023721111,-0.00007296985582517741,0.00003815781784083107,-0.00013236626852468708,-0.00015339718823770843,-0.00009861651584932436,-0.00014130926499773624,-0.00015367579357200722,-0.00017470500292765157,-0.00022388555995694128,-0.00010197082840249539,-0.00012516845523963388,-0.0002198317806512489,-0.000195381389579480…	4224.62	968	1271	0.771	153.31	26.43164,26.43164,26.49316	20.24512,20.40332,20.73438	-3133.21	18.764	23.49	-9.29	-9.29	23.49,24.91,25.53	0.33	27.43	1444,1446,1448,1448,1451,1453,1446,1448,1441,1440,1444,1442,1444,1440,1444,1444,1440,1442,1442,1368,1376,1364,1356,1353,1348,1334,1330,1334,1332,1330,1326,1326,1321,1323,1323,1320,1318,1317,1316,1344,1375,1388,1398,1406,1413,1419,1425,1424,1427,1425,1424,1420,1426,1426,1429,1432,1433,1434,1438,1438,1441,1440,1442,1433,1432,1434,1435,1434,1436,1436,1434,1441,1446,1447,1448,1446,1438,1440,1438,1447…	87.191	0.451	0.00017226504145868667,0.00012247211458284865,0.00007975657811491182,0.00004311247682933271,0.000011676838416229714,-0.000015290649604229753,-0.000038425074315976494,-0.00005827125377241812,-0.00007529656751697357,-0.00008990196341882645,-0.00010243140003599762,-0.00011317994687434753,-0.00012240073330443095,-0.0001303109097839022,-0.00013709676177286467,-0.000142918096775391,-0.00014791200782248…	0.0002	0.000029104783709163393,0.000016750238811731238,-0.00002059868297235974,0.000018599947396858537,-0.000039056346639867066,-0.000059218912131134154,0.00005340233875754215,-0.00001206937085484018,-0.0000244227022859387,0.00001790001699749406,-0.000013200355899152008,0.000011938462253060799,0.00010738918745827476,-0.00006275506704848276,0.000026430001783288855,0.00008906978177764255,-0.00004514190526…	0.0001511979357114081,0.0044444984335044405,0.10296464404132975,2.3637472507041006,54.242862563166064,1244.734419633605,28563.437503137273,655457.0376569733,15041044.256515322,345153075.3581221,7920370646.9545145,181752027328.86578,4170739086668.147,95707678118971.27,2196243749748004.2,50398115418819830,1156506438804938500,26538832491697545000,608997586515957300000,1.3974919978046856e+22	0.00017226504145868667,0.00012247211458284865,0.00007975657811491182,0.00004311247682933271,0.000011676838416229714,-0.000015290649604229753,-0.000038425074315976494,-0.00005827125377241812,-0.00007529656751697357,-0.00008990196341882645,-0.00010243140003599762,-0.00011317994687434753,-0.00012240073330443095,-0.0001303109097839022,-0.00013709676177286467,-0.000142918096775391,-0.00014791200782248…	0.699	0.207	0.093	0.999	0.293	1.795	-1.617	0.822	0.00039950638436972533,0.00008874744225412198,0.00020414623627263977,0.00043503585482783944,0.00020414623627263977,0.00025741756193321363,0.00034621762806200964,0.0003195757016944314,0.00015088144416521387,0.00038174273907594467,0.00013312796508646593,0.00013312796508646593,0.00025741756193321363,0.00020414623627263977,0.00009762318400858612,0.00038174273907594467,0.0002929354095836419,0.00020414…	none	0.691	29.366	620
2559558	8	1	6	8	32.79,32.79,32.79	20.2578	940.119	32.79	1116,1118,1110,1114,1116,1110,1115,1118,1110,1116,1117,1110,1112,1114,1110,1114,1114,1110,1118,1115,1106,1116,1114,1113,1112,1115,1107,1112,1112,1106,1114,1110,1107,1110,1113,1110,1113,1112,1107,1112,1113,1110,1107,1113,1113,1109,1105,1110,1116,1106,1110,1114,1108,1110,1110,1106,1111,1110,1106,1114,1110,1104,1112,1110,1106,1109,1111,1104,1110,1112,1108,1104,1108,1112,1104,1109,1113,1105,1110,1108…	0.00006096901688999251,0.00002918254344308262,-0.00003342111832609656,0.00004575303218249627,0.0001033606128217123,-0.00006095897076826722,-0.000009529594439549909,-0.000004327155693706125,0.00003477890656432644,-8.62961310349653e-8,-0.000016457514424618516,-0.000020500813078727583,0.00007100183053911987,0.00009469999597913861,-0.0000018121709101372413,0.000015718049399013845,-6.53362234956205e-7…	0.0123	0.00027	0.0001557841036873304,0.00004693255810512749,-0.00004340203443650253,0.00002035264664458242,-0.000023753705104820632,-0.00003087817992958254,-0.000047246808550758656,0.0000010970987424048188,-0.000015272731325022976,-0.00006861796490617242,-0.00017124650885161165,-0.00013215904934012218,-0.000046851015088793316,-0.00017412727332179374,-0.00018740887722444363,-0.00004357183321248413,-0.00007842576…	3703.4	838	1114	0.774	81.294	26.96094,27.14648,27.56543	19.1084,19.63379,20.25781	1453.52	35.413	25.23	-7.56	-7.56	25.23,25.33,25.33	0.83	22.65	1273,1274,1276,1274,1276,1275,1272,1268,1267,1270,1270,1271,1268,1276,1276,1276,1272,1270,1270,1222,1227,1214,1206,1204,1198,1196,1194,1202,1197,1196,1184,1182,1180,1184,1182,1179,1182,1181,1174,1194,1219,1224,1227,1234,1238,1238,1241,1244,1246,1246,1249,1250,1248,1258,1259,1262,1264,1262,1266,1258,1259,1259,1264,1268,1269,1268,1260,1262,1264,1264,1268,1270,1265,1262,1263,1262,1265,1262,1264,1266…	72.005	0.427	0.00009782304242107094,0.00007637167351889806,0.00005659517782646159,0.00003836278512198748,0.000021553935419798263,0.000006057481778721477,-0.000008229044646627194,-0.000021400112171467947,-0.0000335428132437253,-0.00004473744033466664,-0.00005505801686533309,-0.00006457278667946422,-0.00007334466529951018,-0.00008143165594961936,-0.0000888872330965145,-0.0000957606960443856,-0.00010209749492191…	7e-05	0.000010543786018976307,-0.000012165732969364283,-0.000009180013120581682,0.00013600834496622512,-0.00002376421755098009,-0.00003619485616590964,-0.000031496407713452434,-0.00003536246292839455,0.00003443169814558146,0.0000031554290552821123,-0.0000024239456888943888,0.00009821639630673604,-0.00004441524860210064,0.000023664659587444764,-0.000011037025112899424,0.000050195244716209424,-0.00008899…	0.000027082619324495926,-0.000028781124018089266,-0.000041839053097149714,-0.00004489129237850471,-0.00004560474123967105,-0.000045771507089455136,-0.00004581048794732454,-0.00004581959956869187,-0.000045821729374152276,-0.00004582222720775579,-0.000045822343574391806,-0.000045822370774632774,-0.000045822377132581535,-0.00004582237861872691,-0.000045822378966107514,-0.000045822379047306356,-0.000…	0.00009782304242107094,0.00007637167351889806,0.00005659517782646159,0.00003836278512198748,0.000021553935419798263,0.000006057481778721477,-0.000008229044646627194,-0.000021400112171467947,-0.0000335428132437253,-0.00004473744033466664,-0.00005505801686533309,-0.00006457278667946422,-0.00007334466529951018,-0.00008143165594961936,-0.0000888872330965145,-0.0000957606960443856,-0.00010209749492191…	0.699	0.211	0.09	1	0.903	1.238	0.021	-0.259	-0.00018902092999610007,-0.00029294738507268435,-0.00030239401154053935,-0.00045351209645557307,-0.00020791849899599724,-0.00034017846274785225,-0.000245711170290204,-0.00020791849899599724,-0.00020791849899599724,-0.00034017846274785225,-0.00018902092999610007,-0.0001323232887262341,-0.00009452074860548805,-0.00014177340964319072,-0.0001512233249327868,-0.00029294738507268435,-0.0002268152457368…	none	0.68	37.382	620
2559557	8	1	5	8	32.77,32.77,32.78	18.8887	940.13	32.78	1334,1336,1341,1344,1337,1338,1342,1334,1342,1338,1334,1338,1342,1333,1338,1339,1334,1337,1340,1340,1333,1334,1341,1337,1332,1338,1334,1338,1330,1336,1334,1335,1333,1334,1338,1332,1336,1334,1328,1335,1334,1330,1334,1336,1329,1330,1334,1339,1326,1332,1334,1331,1329,1330,1331,1332,1332,1328,1332,1336,1326,1330,1334,1326,1330,1326,1331,1332,1332,1326,1333,1334,1327,1330,1332,1329,1326,1331,1329,1326…	0.000020680633453635278,-0.000013710897938955588,0.00007328136874353064,0.000009112498888656267,0.000013653862983501838,0.000038807482237666896,0.00011893599282191082,0.000029568184089007786,0.000027238882776640052,0.000031780224758616284,0.00014626663844336438,0.0001187382042322719,0.0001072455831862099,0.000024753372372308225,0.0000476161529903496,-0.000025704281987637928,0.00001089581232333302…	0.0066	0.00036	0.00016190477443795093,0.0001389579568409716,0.000031271979046759516,-0.00003288381616592595,-0.00008787192131473429,-0.00011538230926145004,-0.0001543360071872186,-0.0000788297158223196,-0.00008573640730053238,-0.00011553558359216214,-0.0001270197214569387,-0.00016597130595135965,-0.00014083067614163787,-0.00012255627128736362,-0.00017752971071113296,-0.00022791856119224423,-0.000186760777897058…	4261.71	958	1340.33	0.775	151.538	27.15625,27.37988,27.56445	17.9834,18.30078,18.88867	0.9299	14.687	24.27	-8.51	-8.51	24.27,24.61,24.81	0.21	25.99	1506,1508,1510,1510,1514,1517,1514,1510,1507,1506,1510,1506,1509,1510,1508,1509,1510,1508,1507,1432,1422,1406,1402,1396,1388,1382,1378,1377,1371,1363,1360,1355,1353,1350,1354,1349,1352,1352,1350,1370,1406,1422,1435,1446,1452,1462,1464,1469,1471,1478,1478,1485,1484,1481,1488,1491,1494,1492,1492,1494,1496,1501,1502,1504,1504,1507,1499,1502,1505,1502,1501,1500,1504,1506,1512,1513,1511,1503,1507,1507…	84.325	0.415	0.00016831570937717578,0.00011724815987210286,0.00007336144869901442,0.00003564584581114221,0.0000032336038551321583,-0.000024621006655489047,-0.000048558854822593114,-0.00006913069425480594,-0.00008680983461322458,-0.00010200303135397155,-0.00011505984421496139,-0.00012628067976365763,-0.00013592370304593666,-0.00014421077735684925,-0.00015133256879344077,-0.00015745293303338963,-0.0001627126852…	0.00135	0.000024361038888542708,-0.000048320186798097096,-0.00008053855958597342,-0.000057132731113312484,-0.00003035418766791982,0.000028457936738774943,0.00002152199527255895,-0.0000376735849255605,-0.00008843372942967695,0.0000175735983663938,-0.00003656444358834948,-0.000026642292458694317,-0.00002514873311894919,-0.00008602364737012349,0.00000986906753105177,0.000016420479214081508,-0.00002591747990…	-0.00002200182479455883,-0.00002325289900372311,-0.000024502810323421675,-0.000025751559834574604,-0.000026999148617098002,-0.000028245577749904435,-0.000029490848310902065,-0.0000307349613769992,-0.000031977918024101706,-0.0000332197193271158,-0.00003446036635994872,-0.00003569986019550937,-0.0000369382019057092,-0.00003817539256146347,-0.00003941143323269217,-0.000040646324988320194,-0.00004188…	0.00016831570937717578,0.00011724815987210286,0.00007336144869901442,0.00003564584581114221,0.0000032336038551321583,-0.000024621006655489047,-0.000048558854822593114,-0.00006913069425480594,-0.00008680983461322458,-0.00010200303135397155,-0.00011505984421496139,-0.00012628067976365763,-0.00013592370304593666,-0.00014421077735684925,-0.00015133256879344077,-0.00015745293303338963,-0.0001627126852…	0.685	0.222	0.092	0.999	1.194	0.391	0.412	0.197	0.00031136217790634073,0.0003305893824209636,0.00007109391663395094,0.0003690463453349418,0.0002248502900331408,0.0001767955755273282,0.00031136217790634073,0.00021523892174202502,0.00009991909050059918,0.00009991909050059918,0.00030174889485161296,0.00021523892174202502,0.0003978913024662966,0.00029213582458611543,0.0001767955755273282,0.0001767955755273282,0.00034020330389973694,0.0001960168232…	none	0.632	31.062	620
2559556	8	1	4	8	32.73,32.73,32.74	17.9824	940.153	32.74	1227,1233,1230,1230,1236,1237,1230,1233,1232,1229,1233,1236,1236,1230,1232,1230,1230,1237,1234,1234,1236,1236,1230,1238,1236,1232,1233,1239,1230,1237,1241,1230,1238,1238,1231,1236,1236,1232,1238,1240,1232,1234,1234,1238,1238,1240,1234,1238,1243,1234,1240,1240,1233,1237,1238,1235,1238,1234,1238,1238,1235,1237,1236,1238,1238,1235,1240,1241,1239,1236,1238,1238,1242,1238,1241,1242,1236,1240,1238,1237…	0.000036670840611465255,0.000029594371513072647,0.00005273461699760397,-0.00007244612665939206,-0.0000273394381900245,0.0001084234057265062,-0.00002500995657740986,-0.00006503988160793246,-0.00005838256689161455,0.000025175523149688495,0.00004007351897805572,0.00003574430981732137,-0.000007036390563995989,0.00007927504160863179,0.00012439206148851683,0.00006512184736933387,0.000022339529626427815…	0.0107	0.0004	0.0002028043706947437,0.00022320066200173138,0.00006777648940697446,0.0000030263170140306,-0.000012286190302701776,0.0000630286049171798,0.00002025036421317209,-0.00010763910386191948,-0.00003234201976687518,-0.0000805999622209563,-0.00010139873707877115,-0.00008650675929788096,-0.00007436004967045888,-0.0001335917577663927,-0.00014615185093282826,-0.00021635031667632454,-0.00012186122906377045,-…	4305.57	934	1231	0.783	93.714	27.89648,28.45215,28.77246	16.72266,17.32129,17.98242	445.148	26.403	24.57	-8.17	-8.17	24.57,24.81,24.95	0.23	23.04	1360,1358,1362,1363,1364,1362,1362,1366,1366,1366,1366,1365,1365,1366,1366,1363,1360,1360,1362,1302,1309,1300,1294,1285,1281,1278,1272,1269,1268,1270,1267,1254,1251,1252,1250,1247,1249,1245,1244,1260,1294,1301,1304,1309,1314,1322,1325,1324,1328,1330,1338,1338,1339,1344,1348,1347,1349,1352,1346,1347,1344,1347,1346,1352,1354,1357,1357,1358,1360,1350,1352,1354,1354,1356,1350,1357,1350,1352,1362,1362…	71.719	0.352	0.0002051249405789539,0.00016950803709940966,0.0001370773161613575,0.0001075477513252153,0.0000806598137712655,0.00005617719135821012,0.00003388471172798311,0.000013586451203445322,-0.000004895987141517467,-0.000021725041373154766,-0.000037048618330119394,-0.000051001393543986605,-0.00006370599487273999,-0.00007527408024991613,-0.00008580731902150747,-0.00009539828549537681,-0.0001041312725563915…	0.00015	-0.000027612225993784517,-0.000016539821545606577,0.000010113926110805307,0.000045426149090286823,0.0000010975936920565203,-0.000039764197589703714,-0.00002869217116568216,0.000058556930378299494,0.00004539116276829499,0.00006685387526535518,-0.00002075661295427066,0.000043985069544161404,0.000036013838288469926,0.000021117612357024772,0.000020071890180012437,0.0000761616416989658,0.0000647269188…	0.00010373972228902478,0.00005055183955452767,0.00001647278355887197,-0.000005362679667826015,-0.000019353309407841696,-0.000028317521363871306,-0.000034061158175500216,-0.00003774127685026103,-0.00004009923817415651,-0.000041610054019068966,-0.000042578078597804485,-0.000043198320692955646,-0.0000435957282227314,-0.00004385035902892327,-0.00004401350854825548,-0.00004411804329036472,-0.000044185…	0.0002051249405789539,0.00016950803709940966,0.0001370773161613575,0.0001075477513252153,0.0000806598137712655,0.00005617719135821012,0.00003388471172798311,0.000013586451203445322,-0.000004895987141517467,-0.000021725041373154766,-0.000037048618330119394,-0.000051001393543986605,-0.00006370599487273999,-0.00007527408024991613,-0.00008580731902150747,-0.00009539828549537681,-0.0001041312725563915…	0.714	0.211	0.074	0.999	0.319	1.213	-1.368	1.155	0.00031886172553173233,0.0003961968068744845,0.0002608694504712659,0.00043486951232333794,0.00043486951232333794,0.00031886172553173233,0.0004735456617747595,0.0003575275448149901,0.0003961968068744845,0.000483215237334924,0.00028019934841157907,0.0001255842493095573,0.0003768617454594303,0.00045420715651041534,0.0002995301067395835,0.0006476309702911602,0.0002995301067395835,0.000222212235446976…	none	0.692	35.914	620
2559555	8	1	3	8	32.7,32.71,32.71	17.2598	940.145	32.71	1198,1202,1197,1201,1202,1199,1198,1201,1202,1201,1196,1202,1202,1199,1196,1202,1206,1198,1198,1198,1200,1202,1200,1200,1200,1197,1198,1206,1204,1197,1201,1197,1204,1206,1200,1201,1204,1210,1198,1206,1204,1199,1198,1201,1204,1202,1206,1205,1201,1204,1206,1198,1204,1208,1196,1206,1203,1200,1205,1208,1210,1202,1208,1206,1212,1201,1208,1208,1199,1198,1201,1208,1210,1210,1203,1206,1206,1211,1202,1204…	0.0000027487535872283848,0.0000024798318004334358,-0.00006749719710441571,-0.0000617909821774471,0.00005346255769724475,0.000011363133397806003,-0.000022765013282320468,0.00001680052420920908,0.00008425741413342116,0.000036180570359315674,0.00012356109896506854,0.00003564215965856494,0.00000350530000634524,0.00003908735360984837,0.00001690906093381007,0.000018631710939849758,0.0000960441999150024…	0.0143	0.00023	0.00013879013370537893,0.00010266329983877568,-0.000005157875034780513,-0.00002334915097798214,-0.000023617780534359606,9.957091527643076e-9,0.000015672610597310426,0.0000034550653590435595,-0.000054560033616340064,-0.00003690810683104652,0.000014596717131747281,-0.00005337394815908964,-0.00008151613333164253,-0.00006983860204589638,-0.00011589607118130631,-0.00011019163954415273,-0.0000447605653…	4294.86	931	1200	0.783	69.878	26.89453,27.31445,27.59863	17.16113,17.2959,17.25977	-60.3337	29.345	25.23	-7.48	-7.48	25.23,25.33,25.39	0.22	15.69	1378,1379,1379,1384,1382,1384,1385,1382,1388,1388,1384,1386,1388,1387,1390,1386,1386,1390,1380,1323,1331,1322,1313,1310,1305,1304,1300,1293,1294,1291,1292,1290,1288,1281,1281,1281,1278,1278,1278,1288,1318,1322,1328,1334,1336,1342,1347,1350,1357,1355,1358,1361,1352,1354,1360,1365,1366,1366,1370,1368,1370,1370,1369,1364,1365,1366,1369,1364,1370,1373,1374,1377,1378,1380,1382,1378,1382,1372,1373,1374…	48.371	0.351	0.00009552145925628141,0.00007983783893558601,0.0000652127507926602,0.00005157475147778864,0.000038857219556286804,0.000026998030063730207,0.00001593925102637785,0.000005626860464295685,-0.000003989517505254692,-0.000012956858753294335,-0.000021318968615595516,-0.00002911669588113044,-0.00003638813233783038,-0.00004316879885043351,-0.00004949181887940911,-0.000055388080288595914,-0.00006088638623…	-1e-05	-0.0000553143132776648,0.00010421141162019382,0.00001840065204659516,0.00003982733483169467,0.00006287987833008894,0.00004043818498825398,-0.000006371631302529049,-0.00003205863468906845,0.000015359210778805183,0.00004815893781084765,0.00005333871684807964,-0.000019465442869898164,-0.000032155990299222284,0.000005513897526221058,0.00006430928469520991,-0.000023117284949698768,0.000064920130126208…	-0.000035362218094391306,-0.000036186808608651156,-0.00003706268116694348,-0.000037993025046848696,-0.00003898122787005921,-0.000040030887937582546,-0.0000411458273320821,-0.000042330105835064606,-0.0000435880357095902,-0.000044924197402332984,-0.000046343456222167087,-0.000047850980056009435,-0.0000494522581864271,-0.00005115312127952897,-0.000052959762615922864,-0.00005487876064204536,-0.000056…	0.00009552145925628141,0.00007983783893558601,0.0000652127507926602,0.00005157475147778864,0.000038857219556286804,0.000026998030063730207,0.00001593925102637785,0.000005626860464295685,-0.000003989517505254692,-0.000012956858753294335,-0.000021318968615595516,-0.00002911669588113044,-0.00003638813233783038,-0.00004316879885043351,-0.00004949181887940911,-0.000055388080288595914,-0.00006088638623…	0.721	0.207	0.073	1.001	-0.328	-0.423	1.694	-0.271	0.00014852206084618418,0.0002519534941023404,0.00013912042464373634,0.00006391466110611069,0.00006391466110611069,0.0002143392136437642,0.00002631666247615457,-0.00004886957132391408,0.00002631666247615457,0.00010151591497408611,0.00015792390058034432,0.000007518883699303899,0.00003571585698589661,0.00008271488110014338,0.00015792390058034432,-0.00004886957132391408,0.0002143392136437642,0.000063…	none	0.714	27.904	620
2559554	8	1	2	8	32.67,32.67,32.68	18.8477	940.199	32.68	1331,1334,1340,1337,1339,1334,1337,1337,1336,1334,1337,1340,1331,1334,1334,1342,1334,1332,1335,1334,1330,1334,1331,1334,1327,1332,1333,1332,1326,1330,1332,1331,1326,1328,1334,1334,1324,1325,1328,1332,1329,1325,1328,1331,1326,1321,1328,1332,1326,1323,1325,1324,1326,1332,1320,1326,1328,1325,1320,1324,1326,1329,1319,1325,1318,1325,1328,1318,1321,1326,1326,1322,1322,1320,1318,1318,1322,1322,1325,1318…	-0.000013999839281234887,0.00009066806824795459,0.00013497261256289838,0.000012082270605834453,-0.00002952614743841375,0.000021731361592993973,0.0000590622809098885,0.00008246325942134535,0.00013141011926879335,0.00006889242608926617,0.00003192319640359697,0.00007157582215659449,0.000027641550720583027,0.00009283523856305599,0.00006979598932621187,0.000046758227758210405,0.000056226245175487266,0…	0.0048	0.00028	0.00015447472920726083,-0.000014838483857038643,0.000017842963232759074,-0.00003304658848698107,-0.00007696663815582166,-0.00007214315141126076,-0.00011605851631624283,-0.00010659370971038424,-0.000029819178324309943,-0.00020833274711160767,-0.0002011898484492496,-0.00017316385824177528,-0.0001451363823361658,-0.00015887743877805786,-0.00018189923572224447,-0.0001886780376455723,-0.00009567618837…	4235.35	948	1337	0.776	207.24	25.54297,26.28418,26.86523	17.17285,17.60059,18.84766	189.288	21.084	24.91	-7.77	-7.77	24.91,24.95,25.05	0.15	26.24	1512,1515,1520,1521,1521,1522,1522,1522,1525,1522,1524,1515,1522,1518,1520,1518,1518,1518,1517,1443,1440,1426,1408,1404,1396,1398,1390,1390,1388,1385,1383,1376,1368,1366,1365,1362,1365,1358,1360,1383,1424,1438,1445,1454,1461,1468,1473,1473,1477,1481,1481,1486,1489,1490,1492,1494,1494,1494,1496,1500,1499,1504,1499,1502,1502,1504,1508,1514,1510,1515,1516,1515,1509,1509,1512,1509,1510,1512,1508,1512…	85.248	0.407	0.00012584802192813305,0.00007360432922617091,0.00003113937449671317,-0.000003377182180513532,-0.000031433085982660806,-0.00005423761267737241,-0.00007277369126664996,-0.00008784027055011971,-0.00010008675570671546,-0.00011004099919284412,-0.00011813205243090471,-0.00012470865893971243,-0.00013005428600446024,-0.00013439934278672237,-0.00013793111150392018,-0.00014080181973555878,-0.0001431352017…	0.00014	0.00008178257045049145,0.000017701159010187415,0.00003213435317149241,0.0001651576640262775,1.1535640228682524e-7,0.000009741314972586604,0.00012352579650226942,0.000016175828737240152,0.000029006687873585915,-0.00000462704752380118,0.0000066009978064538545,-0.000002999255085228773,0.0000787314428509921,0.000014650504361729505,-0.000041410956324593264,0.000032300979041671104,0.0000387230064594362…	0.00008309470428816872,0.00005847805157412609,0.00003810658322883975,0.000021248209860056413,0.0000072970921583683066,-0.000004248131148096036,-0.000013802360712082783,-0.000021708946850633058,-0.00002825202852431953,-0.00003366674443815661,-0.000038147683220484486,-0.00004185587635387853,-0.00004492458516301942,-0.000047464089826488714,-0.00004956565251519092,-0.00005130479708069514,-0.000052744…	0.00012584802192813305,0.00007360432922617091,0.00003113937449671317,-0.000003377182180513532,-0.000031433085982660806,-0.00005423761267737241,-0.00007277369126664996,-0.00008784027055011971,-0.00010008675570671546,-0.00011004099919284412,-0.00011813205243090471,-0.00012470865893971243,-0.00013005428600446024,-0.00013439934278672237,-0.00013793111150392018,-0.00014080181973555878,-0.0001431352017…	0.684	0.224	0.091	0.999	0.268	2.011	-1.991	0.98	0.0004072317045583087,0.00028049647183720926,0.00011760549715654447,0.00017189570060279833,0.00037101786406175895,0.00011760549715654447,0.00008141579821437145,0.0002985992409319372,0.00031670276463881893,0.00028049647183720926,0.00031670276463881893,0.0003891244068466061,0.00035291207614071985,0.00017189570060279833,0.00009951027072512595,0.0004162856365313363,0.0003800710410921993,0.00029859924…	none	0.625	31.761	620
2559553	8	1	1	8	32.63,32.63,32.64	17.8809	940.142	32.64	1746,1744,1752,1758,1755,1750,1753,1756,1757,1758,1750,1754,1757,1758,1750,1752,1750,1756,1754,1752,1746,1748,1747,1753,1750,1746,1750,1745,1746,1750,1756,1746,1751,1750,1752,1746,1748,1750,1749,1742,1750,1749,1750,1742,1738,1746,1748,1740,1742,1745,1745,1738,1742,1740,1741,1741,1738,1742,1748,1737,1740,1738,1737,1742,1739,1734,1738,1736,1742,1741,1734,1734,1740,1739,1742,1733,1733,1734,1736,1733…	0.00004074220117376154,0.00009186329585106855,0.000056457051258459125,0.00008397960283683258,0.0001823090775535931,0.000005308614179966362,0.000032827640570826135,0.00003675200557944746,0.00004067633512701753,0.000091793726995405,0.0000642553506323585,0.00006817957380086808,0.00005637329872059645,0.0001074905487540206,0.00017434677432533776,0.00008387611189744752,0.000048475069069217,-0.000049829…	0.0105	0.0004	0.0001506907940399557,0.00003663725931897686,-0.00006952224289037425,-0.00005773627510134301,-0.00010098339848818893,-0.0001049209878628173,-0.0001009972965029565,-0.00011279584607115332,-0.00016389546299783045,-0.00016783177141944936,-0.00015604832841399223,-0.0001521248142917752,-0.00027394256392739903,-0.00038001283922502155,-0.00023466381871328887,-0.00022288211735935627,-0.000376098350478146…	4070.09	981	1751.33	0.759	95.542	25.70605,25.7793,25.96387	16.91406,17.3916,17.88086	166.323	25.633	23.85	-8.79	-8.79	23.85,24.09,24.23	0.93	22.61	2236,2247,2246,2246,2252,2246,2251,2249,2250,2254,2251,2254,2258,2252,2254,2259,2256,2258,2259,2148,2134,2104,2080,2062,2041,2021,2008,1990,1974,1967,1950,1941,1930,1915,1899,1886,1880,1877,1862,1909,1977,1998,2019,2040,2054,2070,2080,2090,2100,2110,2116,2130,2133,2136,2144,2153,2153,2164,2171,2177,2182,2188,2182,2182,2192,2192,2197,2198,2198,2203,2206,2209,2212,2218,2210,2218,2218,2222,2221,2230…	88.159	0.55	0.00010044180517498717,0.00006375964159691891,0.000030419957035090995,1.1818477684948916e-7,-0.000027422489769352444,-0.00005245365784743478,-0.00007520398570531273,-0.00009588130352070195,-0.0001146745039839896,-0.00013175526788221885,-0.00014727963244784922,-0.00016138941679956582,-0.00017421351749691134,-0.0001858690860439706,-0.0001964625990989109,-0.0002060908311660204,-0.0002148417386560417…	8e-05	0.00002567485121810958,0.00005180486752232577,0.00006729982015896894,0.000017207232617323854,0.000045109147671025444,0.0000393320877962144,0.000014057357733385132,0.00007209397646186848,-0.00003117039242821834,-0.00001745082182414923,-0.00003740503959531389,0.00002594164567383345,-0.000025916977978694837,0.00003920351251831399,-0.000033923907689714746,-0.00007337034372874045,0.0000236458969176439…	-0.00011071773988744038,-0.00012341172504593163,-0.00013416064736584932,-0.00014326254323204532,-0.00015096978177125823,-0.00015749606231473743,-0.00016302233965979354,-0.000167701841420562,-0.00017166431658453932,-0.0001750196330750194,-0.0001778608240693845,-0.00018026666753880524,-0.0001823038705324913,-0.00018402891877034806,-0.00018548964282786987,-0.00018672654433902645,-0.00018777391898889…	0.00010044180517498717,0.00006375964159691891,0.000030419957035090995,1.1818477684948916e-7,-0.000027422489769352444,-0.00005245365784743478,-0.00007520398570531273,-0.00009588130352070195,-0.0001146745039839896,-0.00013175526788221885,-0.00014727963244784922,-0.00016138941679956582,-0.00017421351749691134,-0.0001858690860439706,-0.0001964625990989109,-0.0002060908311660204,-0.0002148417386560417…	0.57	0.278	0.153	1.001	0.611	2.276	-1.021	-0.255	-0.00009775446146876915,-0.0002637022138064999,-0.0003558680174891989,-0.0003558680174891989,-0.00017151684658146563,-0.00017151684658146563,-0.00017151684658146563,-0.00018995548550853348,-0.00018995548550853348,-0.00009775446146876915,-0.00008853328238453901,-0.00031900404310977135,-0.00020839334162807492,-0.000005533858930123052,-0.000023979546116894198,0.000012912611729200631,0.00001291261172…	none	0.42	54.637	620
2559570	9	1	10	9	32.57,32.56,32.56	19.0498	940.097	32.56	1372,1378,1374,1382,1376,1377,1376,1382,1381,1378,1380,1379,1382,1372,1380,1375,1382,1377,1377,1374,1376,1379,1372,1378,1373,1380,1378,1373,1378,1374,1379,1378,1376,1376,1376,1370,1376,1374,1374,1373,1376,1370,1380,1372,1374,1370,1379,1372,1370,1374,1373,1374,1367,1376,1372,1374,1373,1376,1371,1374,1374,1377,1372,1374,1372,1374,1370,1379,1374,1374,1376,1370,1374,1372,1373,1378,1374,1374,1376,1372…	-0.000018370381266922993,0.000012647270195912003,-0.000016022153692372458,0.000024942499580310256,0.00004269614687665385,-0.00005891644473863839,-0.000024588281945167756,0.00010259034297224628,0.0001336105575887041,0.00003861387936105264,0.000036471234087050576,0.00007743400569862087,0.0001051345221755555,0.00006983138392136248,0.00007763540945773738,0.00003570541402274878,0.00006671759469384813,…	0.0177	0.00039	0.00012114084874924157,0.00006263382356791759,0.00007375199040795979,0.000038458308735011355,0.00004957589153412154,-0.00012159323134461795,-0.0000475137074344073,-0.000023140628799870088,-0.000035223541028605724,-0.0001301461540628973,-0.00014884998541955905,-0.00011785601952864581,-0.00010674122719414689,-0.0001917024370099315,-0.00014746113914228723,-0.00009327735633748676,-0.00014511040629505…	4424.64	996	1378	0.775	56.548	27.4375,28.03125,28.45312	18.12207,18.53711,19.0498	709.54	13.856	19.95	-12.61	-12.61	19.95,23.15,24.51	0.37	23.79	1554,1558,1553,1554,1554,1556,1557,1561,1564,1563,1560,1564,1566,1566,1566,1558,1560,1558,1558,1498,1494,1482,1474,1465,1459,1444,1437,1432,1430,1424,1425,1422,1414,1416,1412,1408,1404,1406,1402,1422,1462,1470,1481,1488,1494,1500,1508,1513,1520,1525,1526,1522,1523,1524,1522,1528,1532,1532,1534,1533,1540,1533,1537,1543,1550,1550,1542,1545,1542,1552,1555,1558,1554,1550,1556,1558,1558,1558,1555,1550…	76.719	0.418	0.00011530297701911423,0.00009370047176004748,0.0000732856485859461,0.00005399321003625966,0.00003576144863331955,0.000018532049509011343,0.0000022499038828162625,-0.000013137067205374003,-0.000027678079471466356,-0.00004141964280519688,-0.00005440571003349128,-0.00006667781750497787,-0.00007827521794531871,-0.00008923500600829969,-0.00009959223692425915,-0.00010938003862535602,-0.000118629717706…	0.00013	-0.000008529385019733808,0.00002253287624032062,-0.00004402479041036989,-0.00008079587035657655,-0.000011686152820929747,0.00000448392615859003,0.00005540356420517964,0.000003732719219236023,-0.00002973311836617674,-0.000011909339911264562,-0.00004702810545423585,-0.0000027333039038548676,-0.000013035945881687347,-0.00001506595966383998,-0.00008988643367259247,0.000002382526900481008,0.0000566098…	0.00009337720463489584,0.000025104536070739247,-0.000008476772631298931,-0.000024994426296496867,-0.000033118972156940585,-0.000037115196243992966,-0.000039080820812830775,-0.0000400476534682209,-0.00004052320988847942,-0.00004075712204234419,-0.00004087217652041414,-0.000040928768419147206,-0.000040956604302251786,-0.00004097029595080146,-0.00004097703046823363,-0.000040980342978402126,-0.000040…	0.00011530297701911423,0.00009370047176004748,0.0000732856485859461,0.00005399321003625966,0.00003576144863331955,0.000018532049509011343,0.0000022499038828162625,-0.000013137067205374003,-0.000027678079471466356,-0.00004141964280519688,-0.00005440571003349128,-0.00006667781750497787,-0.00007827521794531871,-0.00008923500600829969,-0.00009959223692425915,-0.00010938003862535602,-0.000118629717706…	0.689	0.22	0.092	1.001	0.534	0.481	-0.706	1.226	0.0009109955867442628,0.0007848545774417818,0.0006587501952088081,0.0008028724786580157,0.0008028724786580157,0.0006587501952088081,0.0005326824187809135,0.0007308053584921554,0.0006587501952088081,0.0007848545774417818,0.0006137217882484291,0.0006857694804947251,0.0006227270961583496,0.0005146757234240066,0.0005686980494275055,0.000541686046439366,0.0006407382721859991,0.0005326824187809135,0.00…	none	0.642	41.533	620
2559569	9	1	9	9	32.59,32.59,32.6	19.7236	940.086	32.6	1163,1160,1159,1166,1160,1164,1158,1164,1160,1158,1156,1165,1158,1156,1162,1166,1163,1168,1174,1177,1178,1181,1178,1178,1178,1177,1173,1176,1174,1172,1174,1171,1176,1173,1174,1170,1176,1172,1177,1170,1174,1172,1171,1170,1172,1170,1169,1172,1168,1174,1169,1174,1169,1176,1166,1165,1168,1170,1163,1170,1170,1170,1174,1173,1168,1170,1172,1170,1168,1174,1165,1172,1168,1171,1167,1171,1166,1174,1168,1173…	0.00009302388216138671,-0.000025227169813288395,0.000010606956379153938,0.00000589537853962396,0.000057951265883195026,0.00010190159574507218,0.00010529925534627689,0.00007219933866055662,0.00009992830410003204,-0.000010208797221509204,0.000058062082327526165,0.00006551451369376837,0.000048637869070654704,0.00003581670823904036,0.000006778703386456781,0.00003450248552816589,0.00005411821087672232…	0.0035	0.0002	0.00007176219787063742,0.000006235088758972293,-0.00004712071054852138,-0.00011668079301523276,-0.00010517785144046971,-0.000049089566455789674,-0.00006595901431349926,-0.00015577598271442547,-0.00010780076180042713,-0.000136824637059634,-0.0001658461187863266,-0.00022727887171448827,-0.0001509477559478023,-0.00005028622747533473,-0.00009552432811480555,-0.00012860012738997033,-0.0002062427185175…	3962.85	845	1161.67	0.787	283.086	27.75879,27.96875,28.1416	18.46484,18.97852,19.72363	10.7012	17.3	18.39	-14.21	-14.21	18.39,20.55,21.99	0.66	23.98	1316,1318,1324,1329,1330,1326,1325,1323,1330,1326,1328,1330,1326,1327,1329,1326,1326,1326,1334,1275,1278,1264,1256,1240,1236,1234,1230,1233,1229,1233,1226,1214,1214,1217,1215,1217,1221,1220,1219,1218,1246,1269,1277,1285,1291,1297,1291,1294,1300,1300,1300,1301,1303,1310,1314,1313,1317,1312,1310,1316,1312,1317,1322,1324,1326,1324,1317,1319,1318,1317,1322,1325,1330,1328,1322,1320,1325,1320,1323,1326…	75.373	0.323	0.0000705075303740922,0.000020417390000806123,-0.00001732326907552034,-0.000045759151604512764,-0.00006718430513898999,-0.00008332719092802432,-0.00009549012647844935,-0.00010465434922877596,-0.00011155917728360101,-0.00011676165345267931,-0.00012068148434128689,-0.00012363489992569778,-0.00012586016521446122,-0.00012753680213325877,-0.00012880007234722824,-0.00012975188941364888,-0.0001304690405…	0.00025	-0.000029921463422521508,0.0000035516988819173975,-0.00011180182610338825,-0.00004412330499032395,0.00003554201180007217,-0.000023369109038854588,-0.00002753292820924431,8.075019987734023e-7,-0.00002046415427666948,0.000013009118799757551,2.908354659278464e-7,0.00000810238872367457,0.00009633150587923906,0.00004938974512474405,0.000040092293131565545,0.000015397267863299553,-0.0000332458976981968…	0.00006246705553811143,0.00005978328284615521,0.00005712807668959951,0.00005450113300135723,0.00005190215095088346,0.00004933083290972488,0.00004678688441743642,0.00004427001414786027,0.00004177993387576416,0.00003931635844383431,0.000036879005730020324,0.000034467596615227024,0.00003208185495135054,0.00002972150752965491,0.000027386284049484304,0.00002507591708730963,0.000022790142066103365,0.00…	0.0000705075303740922,0.000020417390000806123,-0.00001732326907552034,-0.000045759151604512764,-0.00006718430513898999,-0.00008332719092802432,-0.00009549012647844935,-0.00010465434922877596,-0.00011155917728360101,-0.00011676165345267931,-0.00012068148434128689,-0.00012363489992569778,-0.00012586016521446122,-0.00012753680213325877,-0.00012880007234722824,-0.00012975188941364888,-0.0001304690405…	0.707	0.222	0.071	1	4.77	-0.022	0.797	0.224	0.0008758833794720856,0.0008206284568712279,0.0007561732644338902,0.0007837957469938379,0.0008206284568712279,0.0009587789469300294,0.0010969733970943127,0.001428819602239476,0.0013919352774558922,0.0017424629044866088,0.0017424629044866088,0.001779377012617914,0.0014472629394076853,0.0013734942897075692,0.0009127239005021683,0.0006549058567754737,0.000507649948980523,-0.00001654381641286606,0.00…	none	0.654	42.923	620
2559568	9	1	8	9	32.63,32.63,32.62	18.2949	940.063	32.62	1184,1193,1189,1190,1188,1190,1190,1186,1193,1186,1193,1197,1185,1189,1188,1190,1190,1185,1187,1190,1185,1190,1181,1192,1188,1190,1182,1190,1182,1190,1187,1188,1189,1185,1190,1185,1188,1182,1192,1184,1189,1188,1186,1187,1182,1182,1184,1188,1186,1185,1187,1184,1190,1184,1186,1180,1189,1182,1188,1184,1186,1181,1186,1182,1184,1182,1187,1182,1186,1182,1186,1185,1185,1180,1184,1183,1190,1182,1182,1186…	0.00004033020886715965,0.00002612719788022853,0.000054800390324109694,0.000012013152708063585,0.0000063852915561924475,0.000006473938712554118,0.000032287969745792806,0.000058103864511529566,0.0000038815676535675965,-0.000050334651788599746,0.00005265346314599674,0.00015852669373710103,0.00004711400186455953,0.00006721418677532867,0.00013306146499056132,0.00006167461950744107,0.000024600347912563…	0.0092	0.00028	0.00013931720559988642,0.00003933789531824855,-0.000017745451843932065,0.000008069783985201397,-0.0000432938364150503,-0.000008904430226065966,-0.00008313193239269783,-0.00008590193685350969,-0.00009438805232426278,-0.00012859526076557578,-0.0001685154020814286,-0.00013699320494706086,-0.00009117794309772569,-0.00010252233464769477,-0.0001453035363580601,-0.00009663019620397385,-0.000210853545269…	3986.33	940	1190.67	0.764	108.939	26.81152,27.15625,27.58789	17.48828,17.80664,18.29492	541.55	27.996	25.15	-7.47	-7.47	25.15,25.23,25.29	0.4	19.78	1352,1344,1342,1346,1348,1346,1347,1345,1353,1355,1354,1360,1358,1358,1354,1348,1350,1350,1352,1302,1309,1300,1294,1287,1278,1274,1270,1268,1268,1264,1264,1264,1270,1270,1270,1270,1260,1259,1260,1273,1302,1308,1312,1316,1322,1326,1328,1333,1339,1342,1342,1334,1336,1339,1334,1343,1345,1349,1348,1349,1349,1341,1342,1344,1353,1350,1352,1344,1346,1348,1346,1342,1347,1344,1348,1353,1353,1357,1354,1345…	62.719	0.506	0.00010501741369599521,0.0000757889095741788,0.00004957720977845909,0.000026070936473554925,0.000004990850519912275,-0.000013913465704482682,-0.00003086658310152865,-0.00004606989360831851,-0.000059704002601520124,-0.00007193087437102599,-0.00008289575614969471,-0.00009272890355539788,-0.00010154712794249432,-0.00010945518404425498,-0.00011654701439052104,-0.0001229068652834633,-0.000128610287588…	9e-05	-0.00002815179237658472,-0.000001042805248054993,-0.00007725271098927437,0.0001310881022240954,0.00006121443946832883,0.000021555775688471544,-0.0000467098671321564,0.0000010618589472421964,0.00005996707361449022,-0.00002260981064304651,-0.000059080999153176005,-0.00008283479331971846,-0.00004301499158144313,0.00003177985546828287,-0.000042843003736083494,-0.00005070394664352528,0.000008192628635…	0.0000701347483726381,0.00003132737032870087,0.000008747454751197107,-0.000004390577581467815,-0.00001203488842849848,-0.00001648269970239399,-0.00001907064065927912,-0.00002057642361271315,-0.000021452557319249307,-0.000021962332164274755,-0.000022258942591064666,-0.00002243152416534007,-0.000022531940054632036,-0.00002259036663269885,-0.000022624361900267236,-0.000022644141908874353,-0.00002265…	0.00010501741369599521,0.0000757889095741788,0.00004957720977845909,0.000026070936473554925,0.000004990850519912275,-0.000013913465704482682,-0.00003086658310152865,-0.00004606989360831851,-0.000059704002601520124,-0.00007193087437102599,-0.00008289575614969471,-0.00009272890355539788,-0.00010154712794249432,-0.00010945518404425498,-0.00011654701439052104,-0.0001229068652834633,-0.000128610287588…	0.701	0.198	0.1	0.999	-0.2	-2.784	3.12	0.664	0.00006462234695405417,-0.00019730063420938187,-0.00014492867371138923,-0.00011874032492885428,-0.00010128054837658799,-0.0002671200920830405,-0.00005762803581048,-0.00031947732036920624,-0.00000523922834393482,-0.00011001052439380209,-0.00024093911073882533,-0.00007508956736111905,-0.0001885724126967018,-0.0002671200920830405,-0.00009255039687010168,-0.0001274699499887596,-0.00002270286635835568…	none	0.725	33.912	620
2559567	9	1	7	9	32.65,32.65,32.65	17.832	940.104	32.65	1401,1400,1402,1406,1402,1404,1402,1406,1400,1405,1399,1405,1398,1398,1394,1402,1397,1402,1398,1398,1398,1398,1406,1393,1394,1400,1398,1395,1396,1392,1394,1397,1390,1397,1394,1392,1390,1393,1388,1395,1388,1396,1389,1394,1386,1396,1387,1397,1388,1392,1386,1392,1390,1393,1394,1390,1394,1385,1392,1388,1386,1398,1393,1390,1386,1390,1385,1391,1384,1388,1385,1390,1385,1390,1385,1384,1386,1384,1390,1388…	0.0000915830888532752,-0.000027971925893851688,-0.00002811970730493344,-0.000017885738791641242,0.000026091356258066035,-0.000028563041242053224,0.000038773774116491086,0.00009313971266420379,0.000054052093556253236,0.00004092497486235587,0.000030394047359558685,0.00011071817967841218,0.000037884743023759394,0.00004811931819724271,-0.0000402737680339124,0.00004003588165793649,0.000107379152550638…	0.0072	0.00028	0.00015091849085310287,0.0000183829817095854,0.000010448791650314166,0.000012896149880431918,0.00003091593050414084,-0.00008860588053196865,-0.0001250776759710463,-0.00012781932437159034,-0.00010461585723648538,-0.00016183991956103503,-0.00010750500300653722,-0.00007392218625428378,0.00001156414599005385,-0.00020393241181327785,-0.0002170484336647847,-0.0001523449807909196,-0.00014211514178224114…	4085.43	946	1402.67	0.768	138.17	26.66406,26.92383,27.23242	17.51367,17.58789,17.83203	144.055	2.189	21.95	-10.7	-10.7	21.95,24.61,25.63	0.43	20.52	1594,1600,1599,1602,1604,1612,1614,1614,1616,1614,1617,1614,1611,1609,1610,1612,1610,1606,1607,1533,1523,1507,1502,1489,1486,1480,1466,1462,1457,1456,1450,1446,1446,1449,1446,1443,1442,1442,1441,1448,1500,1520,1532,1546,1546,1550,1558,1559,1562,1572,1576,1578,1582,1585,1588,1582,1582,1586,1587,1592,1589,1590,1590,1604,1604,1604,1595,1598,1601,1598,1606,1607,1610,1614,1610,1604,1606,1610,1607,1609…	69.404	0.47	0.00012124396566561479,0.00008459552149530584,0.0000526765356323573,0.000024876674503613536,6.643676936237504e-7,-0.000020423356390542258,-0.00003878972315351576,-0.00005478592201906057,-0.00006871782164016075,-0.00008085181851553656,-0.0000914199308459356,-0.00010062423503152345,-0.00010864072964212073,-0.00011562270074454912,-0.00012170365293663363,-0.0001269998621331392,-0.0001316125989163131,…	9e-05	-0.00002140270642484287,0.000055392275688417774,0.00005728982185726018,-0.000050659050613723605,-0.000045433628777878604,0.00006131793805255357,0.0000282610859309427,0.00004180972740066825,0.000023733837010812058,-0.000010984360393711336,-0.0000357147781950768,0.000066045092046913,0.00008958269326515734,-0.000013380882480509568,0.000011816787405871583,-0.000021236111085272923,0.000012282794967172…	0.00006088233529816822,0.00004822072696318589,0.000037257800122125035,0.000027765659649702187,0.000019546984832796333,0.000012430927507024236,0.000006269560499351471,9.348025476764015e-7,-0.000003684244226768238,-0.000007683599642285869,-0.000011146401497448557,-0.000014144633822986,-0.000016740623271384667,-0.000018988334750844217,-0.00002093449323697007,-0.000022619555082198686,-0.0000240785490…	0.00012124396566561479,0.00008459552149530584,0.0000526765356323573,0.000024876674503613536,6.643676936237504e-7,-0.000020423356390542258,-0.00003878972315351576,-0.00005478592201906057,-0.00006871782164016075,-0.00008085181851553656,-0.0000914199308459356,-0.00010062423503152345,-0.00010864072964212073,-0.00011562270074454912,-0.00012170365293663363,-0.0001269998621331392,-0.0001316125989163131,…	0.657	0.233	0.11	1	0.191	1.594	-1.59	0.996	0.0005086845182350689,0.0004900408692205162,0.00014527764632563643,0.0003409204825360606,0.00009870900605295189,0.00022911378444061332,0.00008008294802667395,0.00021979785874759269,0.000005586703253177688,0.00035023900678572586,0.00008008294802667395,0.00026637948567371437,0.00004283322831060947,0.0002477462353478478,0.00006145768880203985,0.00021048213288351968,0.00013596351878454986,0.000229113…	none	0.576	31.376	620
2559566	9	1	6	9	32.67,32.68,32.68	19.459	940.112	32.68	1136,1137,1134,1141,1134,1136,1135,1142,1134,1136,1131,1136,1134,1134,1142,1132,1134,1132,1133,1130,1136,1133,1136,1126,1135,1129,1131,1130,1133,1133,1128,1131,1132,1132,1130,1134,1137,1129,1132,1130,1132,1130,1130,1132,1126,1132,1126,1128,1133,1127,1124,1123,1130,1130,1126,1125,1128,1126,1129,1124,1130,1123,1131,1122,1129,1126,1128,1122,1126,1123,1129,1123,1126,1122,1126,1124,1126,1124,1127,1131…	-0.000038700948778452395,-0.000004086829654938728,0.00011017662662296399,-0.000004934070498036967,-0.000014913431735269831,0.000042000263050103426,0.000054318853877194304,0.00003159577708320182,-0.000016607540280457755,0.000008450478575972993,0.00005580833604038592,0.00009042718620932981,0.0000454036744687378,-0.0000059848403710744515,-0.00001914852912661218,0.00009828742429319292,-0.000007255554…	0.0038	0.00024	0.00013758194558230745,0.000038403000177750967,0.000047534938711055016,0.00001525931259314119,-0.000029752495255084053,-0.000052468039358097144,-0.00009110345133525805,-0.00013291883077543384,-0.00009513343362455702,-0.0001847024483510536,-0.00015965640255022348,-0.00006774448515238647,-0.00004906159696151863,-0.000024009067659726383,-0.00011677422754701516,-0.00007580508118410148,-0.000098516335…	3832.15	833	1137.33	0.783	262.244	27.53125,27.77832,27.70312	18.12598,18.72559,19.45898	62.3756	35.298	22.57	-10.11	-10.11	22.57,23.39,23.85	0.32	19.69	1275,1276,1281,1281,1282,1276,1277,1274,1272,1277,1280,1282,1278,1286,1286,1285,1285,1278,1278,1222,1225,1215,1208,1203,1194,1196,1192,1187,1186,1186,1181,1179,1178,1174,1176,1174,1174,1173,1174,1188,1213,1224,1232,1237,1246,1253,1257,1246,1253,1254,1259,1268,1268,1268,1260,1260,1260,1270,1268,1271,1273,1273,1274,1266,1270,1268,1274,1274,1280,1278,1270,1270,1273,1270,1272,1276,1280,1278,1283,1280…	62.244	0.355	0.00014170428381256306,0.00008739467103965868,0.000045613014753962766,0.000013469408625233615,-0.000011259419927994323,-0.0000302838865409169,-0.00004491985399595282,-0.000056179646330911845,-0.00006484206812269978,-0.000071506271961155,-0.00007663319995750172,-0.0000805774656667896,-0.0000836118815970601,-0.00008594632879624278,-0.00008774227366701928,-0.00008912393609228112,-0.00009018688133544…	0.00013	0.000004455930102518776,-0.00008252422826477252,-0.000019102532833059526,0.00008800437931682423,-0.000024869801221070686,-0.0000212842342875972,0.0000033269661937185132,0.00005382003845809786,0.00009623013922103317,0.00001084950335561903,-0.000027615819357060504,0.000032578385543560204,0.000007050188372927295,-0.000013624529758195135,0.00002230896980091999,0.000003250925049261847,-0.0000804938117…	0.00004461863967274569,0.000036628713826736194,0.00002912193966888938,0.0000220691009638767,0.00001544274818530949,0.000009217091682656384,0.00000336790130836919,-0.000002127587885432963,-0.000007290764247747274,-0.000012141722771772192,-0.000016699343304273664,-0.0000209813640256226,-0.000025004450486486445,-0.000028784260469864394,-0.00003233550493090832,-0.00003567200525170612,-0.0000388067470…	0.00014170428381256306,0.00008739467103965868,0.000045613014753962766,0.000013469408625233615,-0.000011259419927994323,-0.0000302838865409169,-0.00004491985399595282,-0.000056179646330911845,-0.00006484206812269978,-0.000071506271961155,-0.00007663319995750172,-0.0000805774656667896,-0.0000836118815970601,-0.00008594632879624278,-0.00008774227366701928,-0.00008912393609228112,-0.00009018688133544…	0.703	0.219	0.078	1	0.461	0.437	-0.213	0.776	0.0005599390317767398,0.0005599390317767398,0.00034788980337726645,0.00039205818869136655,0.00027722972888282626,0.0003655566184678045,0.00027722972888282626,0.0003655566184678045,0.00027722972888282626,0.0003655566184678045,0.00028606160950795436,0.0003125583290733953,0.0004715726038357566,0.0002065811489713533,0.00040972680065078684,0.00042739613146009815,0.0004892444510805278,0.000250735164595…	none	0.658	34.961	620
2559565	9	1	5	9	32.69,32.69,32.69	19.252	940.116	32.69	1224,1225,1217,1220,1225,1222,1222,1221,1220,1222,1225,1216,1225,1213,1220,1220,1223,1221,1219,1225,1219,1225,1214,1225,1214,1218,1216,1212,1219,1213,1218,1218,1218,1214,1217,1213,1218,1220,1212,1217,1220,1209,1220,1214,1221,1212,1217,1211,1218,1213,1216,1214,1211,1215,1214,1217,1220,1213,1216,1212,1218,1214,1215,1216,1214,1214,1211,1214,1208,1212,1210,1216,1211,1216,1210,1216,1208,1217,1209,1218…	0.0000749544522184182,0.00008390471644316712,-0.00003061004780727998,0.000014471624429088403,0.00005955736910742291,0.00006549564689338227,-0.000024924729868117906,0.0000201562789425262,0.000041150359957016936,0.00005009967285218018,-0.00004934692253996537,-0.00001029128913238113,0.00004984571315498826,0.000013627568610284696,0.000019565167793212826,0.000022491737608067167,0.00004649593976764607,…	0.0044	0.00033	0.00018167730918386036,0.00007618448651985378,0.00003695517571900719,-0.00005344871146513553,-0.0000505223191303708,-0.00008371842031999552,-0.00014700880041582117,-0.00011398520380910623,-0.00009901940093217942,-0.00007201312703704872,-0.00016840816686943075,-0.0002076113662143725,-0.00018663015191065424,-0.00016263884531709567,-0.00012359868706546351,-0.00018086078184136324,-0.0001237655582926,…	4052.51	929	1220.67	0.771	229.509	26.79297,27.00195,27.21191	18.27344,18.62793,19.25195	487.066	13.663	20.35	-12.34	-12.34	20.35,22.67,23.67	0.58	26.27	1390,1384,1385,1388,1388,1390,1396,1397,1398,1400,1397,1400,1390,1390,1392,1395,1390,1396,1397,1332,1334,1316,1301,1298,1290,1289,1284,1280,1275,1276,1278,1278,1276,1278,1277,1264,1264,1267,1265,1291,1326,1333,1341,1347,1354,1359,1360,1370,1372,1378,1378,1380,1374,1373,1378,1378,1374,1380,1380,1376,1380,1378,1382,1384,1382,1384,1390,1393,1391,1390,1393,1385,1386,1387,1389,1382,1386,1385,1388,1390…	83.51	0.451	0.00018144505374064808,0.00011337351950515363,0.00005926182286672876,0.00001624713624369487,-0.000017946270731534488,-0.00004512743075764466,-0.0000667343873531143,-0.00008391027583138538,-0.00009756380189436921,-0.00010841731751822845,-0.00011704503762905916,-0.00012390341945579158,-0.00012935531180707514,-0.000133689151911184,-0.00013713422544488286,-0.00013987279709669345,-0.000142049753442832…	8e-05	0.000005185076773352232,-0.0000510295084552914,0.000018695920550674513,0.000037719715439709126,0.000004399909001544902,-0.00000765473587114334,0.000004825158481478218,-0.000020314098875699524,0.000021607211050166203,0.00008643508991426257,0.00006947043649634739,-0.00008488030246207592,0.00001755049897008856,0.00003166657743139044,0.000014704354150435039,-0.00004314506207974243,0.00007074542066396…	0.00005508211862143978,0.00002606776248272733,0.000008240565861134343,-0.000002712940667342421,-0.000009443068113407571,-0.000013578238464794431,-0.000016118997755316695,-0.000017680108235374703,-0.000018639296278113695,-0.000019228647072363223,-0.000019590759967026433,-0.000019813251816975222,-0.00001994995676182309,-0.000020033951937152704,-0.000020085560819966003,-0.00002011727069823919,-0.000…	0.00018144505374064808,0.00011337351950515363,0.00005926182286672876,0.00001624713624369487,-0.000017946270731534488,-0.00004512743075764466,-0.0000667343873531143,-0.00008391027583138538,-0.00009756380189436921,-0.00010841731751822845,-0.00011704503762905916,-0.00012390341945579158,-0.00012935531180707514,-0.000133689151911184,-0.00013713422544488286,-0.00013987279709669345,-0.000142049753442832…	0.699	0.208	0.094	1.001	1.265	0.561	0.337	0.102	0.00020302824734279605,0.000005388904174907158,0.00018505731725508234,0.0001940426893451872,0.0001311489883400332,0.0001670871307663882,0.0001670871307663882,0.0001491176878151889,0.00011318103227935052,0.0001491176878151889,0.0001670871307663882,0.00005928162396895926,0.00018505731725508234,0.00005928162396895926,0.000023352401040219923,0.00020302824734279605,-0.0000305358606651017,0.00025694549…	none	0.69	34.07	620
2559564	9	1	4	9	32.71,32.71,32.71	18.4824	940.15	32.71	1369,1371,1366,1374,1365,1370,1376,1362,1374,1368,1372,1366,1363,1366,1368,1362,1367,1365,1366,1363,1366,1364,1363,1364,1362,1366,1366,1362,1366,1362,1366,1366,1362,1364,1357,1365,1358,1358,1359,1362,1359,1358,1365,1358,1363,1356,1364,1363,1356,1357,1360,1356,1360,1363,1354,1363,1353,1362,1358,1363,1360,1357,1355,1358,1357,1358,1357,1362,1363,1356,1356,1356,1358,1358,1354,1358,1358,1358,1355,1357…	0.00001358287214528866,-0.000011575170017246136,0.00007007064618529402,0.00004490930003703639,0.00007726214216065631,0.000008283646054952002,0.00007623702410395507,-0.000014647140077351891,0.00005330207070687392,0.00009661021695949705,0.00007966442662854497,0.000018902793082141534,0.000029344303542295268,0.00008908189682067291,0.000014627940146302082,-0.000021480874523704027,-0.000024730852548555…	0.0051	0.00042	0.0002772449014029694,0.0001507144652791702,-0.000027802088777860954,-0.000039265555384514736,-0.00005620413293767353,0.000008994714040719739,-0.00006544052652162502,-0.00011796426584958482,-0.00013763621122487533,-0.00014909586376897325,-0.00008938710063481536,-0.00014190674466142407,-0.0001807354599455627,-0.00021682370497316792,-0.00013796590461880525,-0.0001767943954002364,-0.0002101458321663…	4390.41	1019	1370.33	0.768	195.495	26.50488,26.63965,26.67773	17.6875,18.04199,18.48242	-271.806	22.178	24.13	-8.58	-8.58	24.13,25.39,25.91	0.2	24.82	1542,1546,1544,1548,1542,1542,1538,1542,1540,1538,1542,1540,1544,1546,1545,1553,1554,1549,1542,1468,1468,1458,1448,1441,1440,1434,1424,1419,1414,1416,1417,1408,1406,1412,1404,1406,1405,1398,1400,1424,1460,1476,1486,1494,1502,1506,1514,1517,1517,1518,1514,1517,1520,1525,1528,1533,1533,1536,1526,1526,1526,1528,1536,1538,1537,1540,1532,1531,1536,1531,1534,1538,1533,1537,1534,1540,1542,1544,1544,1547…	80.155	0.475	0.00024576982930887023,0.0001711568787401468,0.0001097931505075039,0.000059325944561246946,0.000017820336128103448,-0.000016315009768397607,-0.000044388850472375924,-0.0000674775437658907,-0.00008646631568431405,-0.00010208320029472126,-0.00011492695269653661,-0.00012549000543557047,-0.00013417734848586468,-0.000141322056662376,-0.00014719805978922145,-0.00015203064523479755,-0.000156005095483487…	0.00012	0.00005265191731138803,0.000006095841834212822,0.00008445075791111583,0.00008647030907072784,-0.000045089830319638574,-0.00002225580335755048,-0.000027175152947826685,-0.000016482912858710957,0.00003931377841190104,-0.00006101236528489223,0.0000867267004730555,0.000012410268593894098,-0.000020264356877158475,-0.00001824523724387724,-0.000050917493599662785,-0.000007268340941222375,0.0000294458122…	0.00010397975713553161,0.00014142185462210637,0.00019055832788183105,0.00025504170799346454,0.000339665329404846,0.0004507196396531525,0.0005964597961133955,0.0007877193083067104,0.0010387153405114892,0.0013681055363772324,0.0018003749239823444,0.002367655996114375,0.003112117260378698,0.004089097810614724,0.005371220926157496,0.00705379248094637,0.009261885450072914,0.012159637136430115,0.015962…	0.00024576982930887023,0.0001711568787401468,0.0001097931505075039,0.000059325944561246946,0.000017820336128103448,-0.000016315009768397607,-0.000044388850472375924,-0.0000674775437658907,-0.00008646631568431405,-0.00010208320029472126,-0.00011492695269653661,-0.00012549000543557047,-0.00013417734848586468,-0.000141322056662376,-0.00014719805978922145,-0.00015203064523479755,-0.000156005095483487…	0.688	0.212	0.101	1.001	-1.079	-0.94	1.743	0.197	-0.00018426760040533168,-0.00010669077138591456,-0.00029091311892710694,0.000048504471040397404,-0.00022305081903293335,-0.00029091311892710694,-0.000029100082555077052,-0.00022305081903293335,-0.00018426760040533168,-0.0002521359603127128,-0.00010669077138591456,-0.00018426760040533168,-0.00016487469223701903,-0.0003393796988097137,-0.00026183057456394466,-0.0004169149780878869,-0.00010669077138…	none	0.666	34.916	620
2559563	9	1	3	9	32.74,32.74,32.74	18.3242	940.15	32.74	1312,1316,1306,1310,1307,1312,1311,1306,1314,1303,1311,1312,1304,1314,1308,1310,1309,1306,1310,1308,1305,1310,1304,1310,1308,1302,1312,1304,1312,1306,1310,1309,1304,1305,1306,1308,1304,1310,1302,1310,1306,1302,1310,1304,1308,1301,1307,1313,1301,1306,1312,1303,1306,1305,1307,1309,1304,1310,1301,1308,1301,1308,1307,1302,1304,1307,1302,1306,1302,1302,1305,1302,1300,1302,1310,1300,1302,1304,1310,1302…	0.00014333414814394823,0.00009180788212709497,0.00004028833135054723,-4.143930141656386e-7,0.00006338839932670913,0.0001091780306432644,0.00008288509680734349,-0.0000911367936612204,0.000019494365423680312,0.000025638184797473315,0.00004259275994058326,0.000037925868667353727,-0.000035202125892117,-0.0000038374000601625,-0.00005534143209449558,0.000019259350974360845,0.00003981658002991452,0.0000…	0.0056	0.00043	0.00025542402601040637,0.00015703084806883378,0.00002262754746925901,0.00007561548948057089,-0.000015528551718299764,-0.00008503943992362648,-0.00010051024092035646,-0.00015559996779639023,-0.0001134402633267866,-0.00011810407465944935,-0.00014797987274975985,-0.00018505591463240293,-0.00021132532615095412,-0.00010434218991485489,-0.0000441676642626573,-0.00012447500864047506,-0.00021196855803816…	4321.05	982	1310.67	0.773	177.954	28.88574,28.89844,28.77637	18.11621,18.12891,18.32422	-1961.95	9.768	21.71	-11.03	-11.03	21.71,23.19,24.09	0.28	28.07	1466,1470,1473,1472,1478,1470,1475,1476,1474,1474,1479,1474,1482,1481,1483,1483,1483,1484,1483,1420,1412,1401,1396,1390,1386,1381,1374,1372,1373,1368,1366,1365,1365,1364,1364,1364,1364,1363,1364,1366,1409,1422,1432,1440,1444,1438,1440,1444,1445,1448,1446,1449,1448,1454,1460,1459,1460,1459,1466,1469,1466,1472,1462,1465,1462,1464,1470,1473,1474,1476,1465,1465,1468,1472,1474,1478,1474,1468,1472,1468…	89.497	0.435	0.0002519778757457304,0.00018187029424983708,0.0001231915961475577,0.0000740786537594349,0.00003297206503085194,-0.0000014333595830375923,-0.000030230038642882392,-0.000054332305485446896,-0.0000745054395382635,-0.00009138996497195534,-0.00010552198820516152,-0.0001173502200052312,-0.00012725022265930544,-0.00013553633458265304,-0.00014247165098663268,-0.00014827637750592856,-0.000153134822023972…	9e-05	-0.00009443426284396575,-0.000009512119264587668,-0.000046572470564957647,0.00002819190501709772,-0.000008871645839740459,0.000023535465588648304,0.000044082999021558176,-0.00008108160887303534,0.000017398135114865004,-0.000031524280352777125,-0.000002507657241716738,-0.00004803942658294244,0.000001308052697124831,0.0000218544747224259,0.0000203735173553532,-0.00005057381250265894,-0.000045277793…	0.000054981590509942527,0.0006136191900900299,0.004587292446196981,0.03285262789473926,0.2339082096013592,1.6640467978724574,11.836837646557006,84.1974287807241,598.9091954109397,4260.131395992212,30302.955498864227,215549.47977304054,1533235.8650939956,10906137.28315449,77576994.60652438,551816828.9942156,3925156089.193436,27920225544.069115,198600763057.00897,1412677094050.3696	0.0002519778757457304,0.00018187029424983708,0.0001231915961475577,0.0000740786537594349,0.00003297206503085194,-0.0000014333595830375923,-0.000030230038642882392,-0.000054332305485446896,-0.0000745054395382635,-0.00009138996497195534,-0.00010552198820516152,-0.0001173502200052312,-0.00012725022265930544,-0.00013553633458265304,-0.00014247165098663268,-0.00014827637750592856,-0.000153134822023972…	0.697	0.211	0.092	1	0.812	0.678	-0.177	0.499	0.0004410387365740212,0.0005237833854007344,0.00031235616570201435,0.00038588439442300605,0.0004410387365740212,0.00022046338232384387,0.0004226531775718776,0.0003491187239754114,0.00039507629837397804,0.0005145887569713372,0.00025721816246626974,0.0006249371479868374,0.0005237833854007344,0.0005513684387263366,0.00041346068994017394,0.0003307370558498421,0.0003491187239754114,0.00027559671907610…	none	0.675	42.049	620
2559562	9	1	2	9	32.77,32.76,32.77	18.2031	940.125	32.77	1288,1299,1292,1298,1286,1294,1292,1292,1296,1296,1291,1296,1292,1294,1296,1292,1295,1294,1290,1298,1290,1292,1290,1294,1290,1296,1302,1293,1290,1294,1294,1292,1290,1294,1293,1291,1294,1293,1289,1295,1289,1292,1290,1294,1299,1290,1298,1288,1296,1294,1290,1290,1294,1289,1295,1290,1294,1292,1292,1296,1286,1294,1289,1295,1295,1288,1294,1290,1294,1298,1288,1291,1292,1294,1297,1294,1298,1289,1292,1292…	0.000021738320715968754,0.00007085777220082362,0.00010037179756021765,0.000007334900614408907,-0.00004157573856224707,-0.000024321877768828274,-0.00000706753419300159,0.00005675241102484084,0.0000862645204446929,0.00002264148097696609,0.000027643238002483284,0.00009881983950491998,0.00014059033576832602,0.000013240364050661169,-0.000016065220841920857,0.000040398234629251176,0.0000257944901841182…	0.0061	0.00031	0.00018306042595887142,0.00003854903729786304,0.00006805758987174427,0.00008531333818938444,-0.000019960191531858128,-0.00010315964020106018,-0.000041810476214706863,-0.00012010537870385238,-0.00009550727151402365,-0.00006600825199915477,-0.00015409500798793768,-0.0001686897859172469,-0.0001538923492141137,-0.00018563160103736277,-0.00014144276584742387,-0.00009724995318146426,0.00002044976280753…	4508.14	1060	1296.33	0.765	163.762	28.55762,28.95117,29.12402	17.2002,17.65332,18.20312	81.0118	21.954	23.35	-9.42	-9.42	23.35,23.99,24.37	0.36	23.45	1502,1502,1499,1502,1494,1499,1498,1496,1496,1497,1494,1496,1500,1498,1497,1494,1496,1499,1502,1442,1445,1435,1431,1425,1413,1410,1404,1406,1403,1404,1404,1399,1400,1400,1400,1398,1396,1390,1387,1402,1444,1456,1462,1462,1465,1463,1470,1474,1477,1475,1478,1482,1480,1482,1488,1489,1492,1493,1497,1488,1485,1488,1490,1490,1490,1490,1487,1491,1486,1494,1491,1492,1491,1488,1493,1492,1493,1494,1496,1498…	73.199	0.5	0.00016991301696992763,0.0001225722190480863,0.00008238252655579965,0.00004826372303898434,0.00001929876508011309,-0.0000052908659468277515,-0.000026166088859274695,-0.00004388798680751585,-0.00005893288803827639,-0.00007170516862043632,-0.00008254812124387294,-0.00009175318222243533,-0.0000995677647039547,-0.00010620190862789932,-0.00011183392616788879,-0.00011661519439697604,-0.0001206742239927…	0.00013	0.000003084339743634052,0.00004597904486555536,-0.000007159742964964513,0.000016201326869688268,0.000015148161722123877,0.00004990425141063275,0.00002443531505961001,0.00005105293366329689,0.00008581118617467287,0.000021275722227252828,-9.35829668229211e-7,0.00008590592362263924,0.00010113091499317701,0.00003984970602978816,0.00009902342080417863,0.0000833192229375867,0.00003831750137583562,0.000…	0.00008876182185408143,0.00007868577546837218,0.00006939381892218995,0.00006082493653012453,0.000052922860677303454,0.0000456357023377797,0.000038915610344948155,0.00003271845717658838,0.00002700354919123963,0.000021733359413172974,0.00001687328111129225,0.000012391400553837864,0.000008258287446685996,0.00000444680167915516,9.319151083153255e-7,-0.000002309452788454633,-0.0000052985864718499,-0.0…	0.00016991301696992763,0.0001225722190480863,0.00008238252655579965,0.00004826372303898434,0.00001929876508011309,-0.0000052908659468277515,-0.000026166088859274695,-0.00004388798680751585,-0.00005893288803827639,-0.00007170516862043632,-0.00008254812124387294,-0.00009175318222243533,-0.0000995677647039547,-0.00010620190862789932,-0.00011183392616788879,-0.00011661519439697604,-0.0001206742239927…	0.712	0.192	0.096	1	-1.239	-1.011	2.001	0.01	0.00010025791083123538,0.0001549538008180786,-0.0000820119881397142,0.0001549538008180786,-0.0000820119881397142,-0.00013667804421328632,0.00010025791083123538,0.0001276049947613638,-0.0000820119881397142,0.00010025791083123538,-0.00014578838461080303,0.00010025791083123538,-0.000045564127608618794,-0.00013667804421328632,-0.00006378844023180574,-0.00010023477139645972,-0.0001548985339016714,0.00…	none	0.762	31.524	620
2559561	9	1	1	9	32.78,32.79,32.79	16.8467	940.162	32.79	1043,1043,1048,1046,1045,1045,1045,1044,1050,1054,1044,1048,1043,1048,1049,1044,1046,1048,1040,1047,1042,1047,1046,1044,1046,1045,1042,1046,1045,1042,1044,1050,1046,1042,1042,1044,1043,1038,1048,1040,1046,1045,1043,1044,1044,1041,1046,1040,1045,1046,1042,1046,1045,1042,1038,1046,1045,1040,1045,1040,1045,1046,1041,1037,1044,1044,1039,1042,1046,1038,1042,1043,1038,1046,1044,1038,1037,1045,1040,1036…	-0.000004822465132476806,-0.0000021135711192785823,0.000015665378869126013,-0.00001929997803691594,-0.000009056607945630698,-0.000006347838778629991,0.00009808726476717633,-0.00003483370308642007,-0.00004342521569943279,0.000038391868648466164,-0.00003424077145176518,0.00008901847571325443,0.00003521438743794883,0.00003792244951119143,0.00001802820904650662,0.000032037213715145514,-0.000025522226…	0.0221	0.00038	0.0001209198275059238,0.00008972096535002044,0.00012633375504044012,-0.00003669331597183346,-0.00006787711427383234,0.00006288072205251372,-0.000047397693800764887,-0.00009740563190300443,-0.00007963605136627875,0.00002098057613651732,-0.00007798451825903306,-0.00009786668302311454,-0.00010268806820865533,-0.00014891993383003924,-0.00010480080428538952,-0.00013220914223150028,-0.00002408379163284…	3577.65	822	1045.67	0.77	45.181	24.14453,24.96094,25.65234	16.16113,16.27148,16.84668	402.172	7.975	24.23	-8.56	-8.56	24.23,24.51,24.67	0.64	17.81	1203,1198,1199,1196,1198,1198,1196,1196,1196,1198,1202,1200,1201,1197,1198,1202,1202,1196,1200,1156,1158,1150,1147,1140,1145,1141,1140,1141,1136,1138,1137,1128,1125,1122,1122,1125,1120,1122,1119,1134,1162,1161,1168,1170,1176,1180,1184,1186,1190,1190,1194,1190,1186,1185,1188,1186,1196,1195,1198,1198,1192,1194,1190,1190,1198,1195,1196,1195,1196,1196,1196,1194,1194,1198,1204,1202,1198,1194,1198,1196…	55.895	0.456	0.00010582302031200496,0.00008895861841682121,0.00007283921701644626,0.00005743190502748008,0.000042705225243960235,0.00002862911011098691,0.00001517482033560572,0.000002314886209612969,-0.000009976948475520807,-0.000021725780036117512,-0.00003295559613559855,-0.00004368932476024796,-0.00005394888103142718,-0.00006375521194981575,-0.00007312833916303495,-0.00008208739984397182,-0.0000906506857632…	7e-05	-9.154373875347965e-7,0.000007529569356487023,-0.00004614247018793235,0.00008491273783984416,-0.000025984920429797444,-0.0000616742477133131,0.00006283749439846777,0.000005888399572545546,-0.000011822368429392241,-0.00005405152878129675,-0.000025991948525388742,0.0000314965784231467,-0.000015641225697063406,0.000009151583994573568,-0.00001509859509075039,-0.0000687700996270077,-0.0001028228744629…	0.00008681941764937325,0.00006285943722371532,0.00004683342641381382,0.00003611417631776425,0.00002894443682459808,0.000024148843481850033,0.000020941235237376204,0.000018795775871941217,0.000017360751536702377,0.000016400912876551304,0.000015758909649918034,0.00001532949566596508,0.000015042275349984215,0.00001485016351153699,0.000014721666478360438,0.000014635719211036194,0.00001457823202570674…	0.00010582302031200496,0.00008895861841682121,0.00007283921701644626,0.00005743190502748008,0.000042705225243960235,0.00002862911011098691,0.00001517482033560572,0.000002314886209612969,-0.000009976948475520807,-0.000021725780036117512,-0.00003295559613559855,-0.00004368932476024796,-0.00005394888103142718,-0.00006375521194981575,-0.00007312833916303495,-0.00008208739984397182,-0.0000906506857632…	0.708	0.201	0.091	1	0.566	1.257	-0.26	0.003	0.0002767964404635153,0.00003877613568215244,0.0000035249601836687247,0.00010928707173078086,-0.00005815771278168566,0.0000035249601836687247,0.0001445468332101394,0.00005640279647579778,-0.00003172335425035893,0.00007403017270967795,-0.000022911543841285253,0.00003877613568215244,-0.00005815771278168566,-0.00017268801062760673,0.00004758937665255778,-0.00008459046242132346,-0.0000669688080842769…	none	0.722	36.764	620
ID	Series	Repeat	Cultivar No.	Replicate no.	air_temp_kinetics	Ambient Humidity	Ambient Pressure	Ambient Temperature	data_raw_PAM	ECS_averaged_trace	ECS_tau	ECSt mAU	fitinput	FmPrime	FoPrime	Fs	FvP_over_FmP	gH+	humidity2_K	humidity_K	kP700	leaf angle	Leaf Temperature	Leaf Temperature Differenial	Leaf Temperature Differential	LEAF_temp	leaf_thickness	LEF	LEFd_trace	Light Intensity (PAR)	NPQt	outdata	P700_DIRK_ampl	P700_DIRK_averaged_trace	P700_fitinput	P700_outdata	Phi2	PhiNO	PhiNPQ		PS1 Active Centers	PS1 Open Centers	PS1 Over Reduced Centers	PS1 Oxidized Centers	PSI_data_absorbance	pump	qL	SPAD	test_data_raw_PAM
2579861	Whole Data Set	1	5	1	27.2,27.18,27.17	20.8281	921.551	27.17	1344,1344,1348,1354,1353,1346,1350,1352,1348,1352,1358,1349,1355,1357,1350,1356,1358,1353,1356,1356,1352,1349,1356,1350,1355,1357,1350,1350,1357,1350,1359,1360,1352,1358,1360,1353,1356,1360,1350,1356,1358,1353,1352,1355,1354,1357,1350,1358,1360,1350,1358,1353,1353,1357,1358,1353,1358,1355,1356,1361,1356,1353,1362,1362,1355,1361,1361,1354,1360,1364,1356,1361,1366,1356,1358,1354,1364,1360,1355,1362…	-2.4590601026421296e-7,0.000009999105976801016,-0.000053522540076353655,0.00003356274039860269,0.000025364277563543638,0.00007864446600594332,0.000030484256022006087,0.000049949845462566045,0.000143195802149558,0.00009810380633969101,0.00004687063658452182,0.0001493342403957273,0.00007350527898157253,0.00010219172883910761,0.00005403487944378178,0.0001657159036267432,0.00010833111154355457,0.0001…	0.017	0.00053	0.00013086001450637522,0.00020873053507023255,0.0000652876988682335,0.000054017632668473296,-0.00002177810181722907,0.00011137913179919742,-0.00015489431777658343,0.00005810710615980647,-0.00011905782610475471,-0.00011496151572969915,-0.00019685934422827524,-0.00012826913961536872,-0.00015795622112335092,-0.00023062971447212224,-0.00019275614818560572,-0.00021015420470327519,-0.000202987169887249…	5025.72	1126	1348.67	0.776	58.732	24.76562,25.50293,26.26562	20.63672,20.67285,20.82812	127.534	15.651	19.09	-8.08	-8.08	19.09,20.95,22.19	0.24	20.8	1596,1594,1598,1606,1594,1598,1601,1607,1598,1600,1603,1608,1604,1599,1602,1610,1608,1602,1606,1558,1553,1543,1545,1535,1526,1522,1523,1520,1512,1508,1514,1510,1502,1499,1504,1500,1494,1493,1496,1500,1529,1533,1541,1558,1558,1558,1556,1561,1566,1569,1564,1566,1571,1578,1579,1573,1574,1577,1585,1581,1580,1582,1588,1589,1588,1584,1592,1596,1594,1588,1592,1595,1594,1590,1591,1601,1600,1593,1596,1603…	63.137	0.409	0.00017936236075047238,0.00014908469919892533,0.00012053407866636655,0.00009361198855031128,0.00006822553730346538,0.00004428713192222266,0.00002171417571717165,4.28783322805942e-7,-0.000019642488036890576,-0.000038568891954218006,-0.000056415731789242844,-0.00007324458599146296,-0.00008911352056910018,-0.00010407728943912295,-0.00011818752334928132,-0.00013149290802400994,-0.00014403935214886976…	0.00013	-0.00002264155957195575,0.00009312473620013583,0.000048205108958366205,-0.00008052950328524119,0.000026488422311570054,0.00001999669173728895,0.00004144914114864672,-0.000020928254813100436,-0.00003789675137197071,0.000018480668944012063,-0.000056116482574250535,0.000050906579291362496,0.000011231126846145038,-0.00001621658056147838,-0.00001572235534387453,0.000019699566702957434,0.00006036411576…	0.00003233363612499138,0.000017270551349289902,0.000004011066859265099,-0.000007660774039142194,-0.000017935070152254364,-0.00002697915853031961,-0.000034940339879362706,-0.000041948277641898206,-0.00004811710982023741,-0.00005354730793757128,-0.000058327313413653956,-0.00006253497800667224,-0.0000662388317817204,-0.00006949919925723199,-0.00007236918190800111,-0.00007489552302678042,-0.000077119…	0.00017936236075047238,0.00014908469919892533,0.00012053407866636655,0.00009361198855031128,0.00006822553730346538,0.00004428713192222266,0.00002171417571717165,4.28783322805942e-7,-0.000019642488036890576,-0.000038568891954218006,-0.000056415731789242844,-0.00007324458599146296,-0.00008911352056910018,-0.00010407728943912295,-0.00011818752334928132,-0.00013149290802400994,-0.00014403935214886976…	0.732	0.19	0.078	1	0.288	1.074	-0.349	0.275	0.00016763030984979645,0.000042383162073758444,0.0000905508674905043,0.000013485102915338465,0.00010018504968198416,0.000003852843820862365,0.000052016275783229144,0.0002639988545809523,0.000023117575649254344,0.000003852843820862365,0.00017726620210576364,-0.00003467405635106165,-0.000053936224846190576,0.0001387239157915375,0.000042383162073758444,0.0001483591667021482,0.0002543610377767261,0.0…	none	0.787	40.096	620
2579860	Whole Data Set	1	5	1	27.07,27.1,27.12	24.624	921.522	27.12	1434,1432,1433,1438,1434,1439,1439,1443,1442,1442,1441,1438,1436,1438,1445,1443,1442,1445,1440,1442,1444,1444,1439,1436,1439,1438,1444,1448,1442,1443,1443,1438,1438,1438,1442,1444,1446,1447,1444,1445,1443,1440,1440,1437,1441,1441,1444,1445,1442,1444,1442,1448,1446,1446,1442,1441,1444,1442,1446,1444,1446,1448,1448,1446,1446,1446,1448,1442,1443,1453,1450,1450,1450,1447,1444,1446,1444,1446,1448,1447…	0.000047465761603224815,-0.00006113479338348716,0.00008191508150652831,0.00000842123015477762,0.000022717941552042326,0.000010679768830569313,0.0000015682697935580055,0.00009779757644911885,0.00015599428930430467,5.675862762067377e-7,0.00011727563095875516,0.00010523440299091358,0.00006100743445028143,0.00007822834310565916,0.00016568036374288913,0.00003074661452665153,0.00008307483274781668,0.00…	0.0174	0.00054	0.0002543805036571666,0.00010187862978247942,0.00006936222032464568,0.00006610202031718263,-0.00004245501210651725,-0.000019390929575799293,0.000012447845763823725,-0.00008731622865368992,8.188937307462165e-8,-0.00009382740352913403,-0.00016140276387698185,-0.00013249829902108338,-0.0000948218591405149,-0.0002734621266290485,-0.00019195404758086155,-0.00014551416667722968,-0.00025983378697042676,…	4991.43	1114	1434.33	0.777	57.617	27.77344,28.16602,28.47363	24.3457,24.44238,24.62402	2370.93	16.759	18.55	-8.57	-8.57	18.55,20.29,21.47	0.26	19.65	1713,1715,1715,1723,1715,1718,1729,1723,1729,1725,1723,1729,1728,1731,1732,1726,1734,1736,1729,1674,1674,1658,1653,1652,1636,1628,1631,1624,1614,1620,1615,1604,1602,1604,1597,1592,1598,1592,1586,1592,1632,1642,1646,1657,1663,1659,1666,1676,1674,1678,1683,1679,1685,1690,1685,1694,1696,1688,1698,1700,1696,1701,1708,1700,1706,1710,1708,1704,1711,1712,1709,1716,1717,1713,1720,1720,1716,1720,1725,1718…	61.239	0.402	0.00018621827277973834,0.00015588182792979777,0.00012724388565148382,0.00010020934874405032,0.0000746884443893812,0.00005059642604594573,0.000027853292033367533,0.000006383519873119051,-0.000013884184496826485,-0.00003301712346615878,-0.00005107883124136353,-0.00006812928482195508,-0.0000842251031643938,-0.00009941973519504477,-0.00011376363729650863,-0.0001273044408566961,-0.00014008711043702417…	0.00011	-0.000021381139870201488,0.00003306243248445419,-0.000009165987266117851,-0.000010967525924789082,-0.00004088953950832009,0.00006980144912255114,0.00007151543310624703,0.00004686119021912623,-0.000009429633098593648,-0.000011231171783939554,0.00004672936725620855,0.0000168033629894494,0.000027305797780433674,-0.00004304247806955042,-9.051839057224903e-7,0.00003068949026169922,0.000014825953540523…	0.00006980945590517111,-0.00003416744033860691,-0.000043878260435300755,-0.00004478519294008781,-0.00004486989501056684,-0.000044877805677243315,-0.00004487854448618757,-0.00004487861348652324,-0.00004487861993074182,-0.000044878620532593286,-0.00004487862058880261,-0.00004487862059405223,-0.00004487862059454251,-0.0000448786205945883,-0.000044878620594592574,-0.000044878620594592974,-0.000044878…	0.00018621827277973834,0.00015588182792979777,0.00012724388565148382,0.00010020934874405032,0.0000746884443893812,0.00005059642604594573,0.000027853292033367533,0.000006383519873119051,-0.000013884184496826485,-0.00003301712346615878,-0.00005107883124136353,-0.00006812928482195508,-0.0000842251031643938,-0.00009941973519504477,-0.00011376363729650863,-0.0001273044408566961,-0.00014008711043702417…	0.713	0.205	0.082	1	0.528	0.013	0.296	0.692	0.0005276137799997299,0.0006840669656078758,0.0005667217928045147,0.00031258263654636336,0.0005276137799997299,0.0004200848997940189,0.00038099008874899795,0.0002930396291450758,0.00039076346158254733,0.0002344158829331139,0.00025395625241755307,0.00021487639259596937,0.00034189879666796845,0.0004885092885360065,0.00015626319567824977,0.0002930396291450758,0.00021487639259596937,0.000429859152467…	none	0.713	37.742	620
2579859	Whole Data Set	1	5	1	26.67,26.69,26.73	24.5312	921.511	26.73	1478,1472,1474,1484,1481,1482,1477,1478,1486,1485,1484,1478,1481,1482,1486,1480,1480,1485,1486,1484,1490,1484,1487,1482,1481,1485,1483,1482,1481,1487,1486,1484,1483,1492,1486,1482,1482,1484,1493,1484,1490,1486,1485,1493,1489,1485,1486,1484,1493,1492,1489,1486,1484,1492,1489,1486,1485,1491,1490,1484,1486,1495,1489,1486,1493,1490,1486,1483,1485,1491,1490,1490,1483,1492,1489,1484,1486,1484,1493,1489…	0.00003333839435044872,-0.00006619350418297904,-0.00004513369303298215,0.00009365320795404951,-0.0000948789842509955,0.00009270020556092561,0.00005058855909569997,0.0001089763227251771,8.325199233238291e-7,0.00009940844083333798,0.00015205311912316232,0.00008697077303694678,0.00006496261224007497,0.00010037318851230297,0.00013291347279665753,0.00021714033020100385,0.00008315468962176548,0.0001558…	0.0142	0.00063	0.0003310391754297626,0.0001424889636073254,0.00009464986645672536,0.00012144080987109684,-0.00007847209466478404,-0.00003160482657291148,-0.000004820356355615858,-0.0000325497802698012,-0.00006027584567799037,-0.000231397270087261,-0.00004400741708656757,-0.00021225846362527256,-0.00019982211263524572,-0.00018165115381739582,-0.00026669960404711047,-0.00026859837139234184,-0.00017015204704385977…	5092.35	1135	1476.67	0.777	70.228	27.44922,28.00293,28.49512	24.29883,24.36035,24.53125	0.0016	12.896	18.79	-7.94	-7.94	18.79,20.71,21.85	0.23	20.25	1779,1785,1786,1785,1794,1788,1795,1800,1794,1801,1804,1798,1798,1805,1801,1802,1805,1799,1805,1741,1745,1725,1716,1708,1694,1696,1684,1682,1671,1671,1664,1657,1660,1651,1640,1649,1638,1635,1642,1643,1672,1688,1702,1700,1714,1718,1717,1728,1730,1729,1733,1739,1740,1746,1745,1745,1754,1754,1752,1760,1764,1759,1766,1772,1763,1769,1774,1770,1772,1782,1778,1775,1786,1782,1785,1782,1783,1791,1785,1792…	63.367	0.4	0.00025383573061088055,0.00021077145580222588,0.0001706277402426821,0.0001332065156641671,0.00009832314651318325,0.00006580551896278897,0.0000354931917065115,0.0000072366043442354455,-0.000019103660545738736,-0.00004365756528939077,-0.0000665462583484273,-0.00008788267206430407,-0.00010777207986407901,-0.00012631261567733898,-0.00014359575812699347,-0.00015970678188292046,-0.00017472517840543683,…	1.26883	0.000052882132652378265,-0.000025021841524972705,0.00005530851018401065,-0.00004337168467947921,0.000004988224469340119,0.000056550365359027685,0.00008893499404063908,0.00005258286815973262,-0.0000013473330738176267,0.000021442796641077143,0.00009218938950767399,0.00004464802787309157,0.00006903896983015999,0.00006305892366637322,-0.000019640489617062827,-0.00003680617671614199,0.0000195454410973…	-0.0000051266375640235395,-0.000007182643557479551,-0.00000923864621937831,-0.000011294645549941862,-0.000013350641548726117,-0.000015406634216175163,-0.000017462623551844914,-0.000019518609556179456,-0.000021574592228956746,-0.000023630571570176784,-0.000025686547580061614,-0.00002774252025838919,-0.000029798489604937473,-0.00003185445562037259,-0.00003391041830402841,-0.000035966377656349025,-0…	0.00025383573061088055,0.00021077145580222588,0.0001706277402426821,0.0001332065156641671,0.00009832314651318325,0.00006580551896278897,0.0000354931917065115,0.0000072366043442354455,-0.000019103660545738736,-0.00004365756528939077,-0.0000665462583484273,-0.00008788267206430407,-0.00010777207986407901,-0.00012631261567733898,-0.00014359575812699347,-0.00015970678188292046,-0.00017472517840543683,…	0.71	0.207	0.083	1	0.786	0.798	1.913	-1.711	-0.0010995987001736016,-0.0012053522271336273,-0.0014167820573811143,-0.001372742663549012,-0.0013463168835108543,-0.0013991668357395042,-0.0012758402746656336,-0.001407974535870702,-0.001363934248862348,-0.0013903589569803404,-0.001319889495429352,-0.0012494085975116858,-0.0013991668357395042,-0.0013551256555187192,-0.001231786585664924,-0.0013815508995859347,-0.001372742663549012,-0.00138155089…	none	0.702	37.576	620
2579858	Whole Data Set	1	5	6	25.83,25.86,25.89	26.168	921.614	25.89	1393,1394,1390,1385,1393,1387,1391,1382,1391,1384,1391,1392,1382,1388,1384,1390,1384,1390,1380,1390,1382,1389,1384,1392,1387,1380,1383,1379,1386,1381,1389,1383,1386,1381,1388,1385,1378,1384,1380,1382,1378,1386,1379,1382,1379,1380,1380,1381,1378,1385,1378,1381,1381,1380,1385,1377,1382,1374,1382,1382,1376,1381,1377,1382,1374,1384,1380,1376,1379,1375,1379,1376,1378,1374,1382,1380,1380,1378,1374,1380…	-0.000013939223194440712,-0.000048458077377720736,0.000026009275721669137,0.00009475087344154907,0.00004874940391099642,-0.00004313419694233344,0.00012886516454729322,-0.00004334012832880691,0.00019464673648518318,-0.000023471361025792103,0.00003378654688532893,0.00008244556250493039,0.000024975086566645363,0.00011092397480352773,0.00002190016740967166,0.00010497874437081646,-0.000004118294656181…	0.0101	0.00027	0.00006430159351966415,0.00007280273123781299,-0.0000276790972483965,-0.00009946612748481842,0.00006962334084342776,-0.0001054054224692725,-0.00015137798458533336,-0.00007407226429892367,-0.00010858002522133337,-0.00012588391547043438,-0.0001689864830731591,-0.00014042248902229506,-0.0001089900941241053,-0.00015496020574866045,-0.00015792896065617247,-0.0001866953714351834,-0.00018393105241533197…	4720.69	1026	1389.67	0.783	98.81	28.22949,28.80664,29.29785	26.22461,26.17773,26.16797	508.972	23.269	22.33	-3.56	-3.56	22.33,22.39,22.47	0.18	28.39	1570,1564,1577,1569,1578,1576,1571,1578,1578,1572,1578,1573,1584,1580,1572,1582,1576,1571,1582,1510,1508,1486,1482,1467,1460,1464,1455,1454,1444,1445,1446,1439,1442,1442,1434,1440,1440,1430,1437,1454,1494,1501,1514,1530,1530,1534,1546,1538,1548,1546,1548,1557,1554,1561,1558,1556,1560,1564,1556,1558,1568,1562,1566,1568,1564,1566,1570,1565,1570,1562,1571,1573,1566,1570,1574,1566,1568,1578,1568,1572…	89.36	0.355	0.0000700757390621499,0.00004471060027475023,0.000021731953574169672,9.152646289312225e-7,-0.000017942875464752652,-0.000035026737779674254,-0.00005050325615027181,-0.00006452365835558785,-0.00007722494383154347,-0.00008873122235189528,-0.00009915492675870836,-0.00010859791159246088,-0.00011715244835697212,-0.0001249021271443194,-0.00013192267342991267,-0.0001382826880189856,-0.000144044317374841…	0.00019	0.00003286916853002231,-0.00007565358751379043,0.000013123105973937262,-0.0000538624803734894,-0.00003604401083745831,-0.0000061096510710975166,-0.00001944325369726758,-0.0000016234755760114446,-0.00007898932303597996,-0.000017906315364943996,-0.000001817316569119754,0.000002156556317704653,0.00007536804118627817,-0.00002970254791501149,-0.000013614048128343303,-0.00005117588603620544,-0.00005412…	0.0001745546754066479,0.00009908502237490826,0.00005371923740777164,0.000026449277059352637,0.000010056951037813475,2.0331175989612043e-7,-0.000005719838309943631,-0.000009280320458754113,-0.000011420572348799694,-0.000012707105453417012,-0.00001348045714953023,-0.000013945328860747554,-0.000014224769261507324,-0.000014392744502186734,-0.000014493716592852905,-0.000014554412223067572,-0.000014590…	0.0000700757390621499,0.00004471060027475023,0.000021731953574169672,9.152646289312225e-7,-0.000017942875464752652,-0.000035026737779674254,-0.00005050325615027181,-0.00006452365835558785,-0.00007722494383154347,-0.00008873122235189528,-0.00009915492675870836,-0.00010859791159246088,-0.00011715244835697212,-0.0001249021271443194,-0.00013192267342991267,-0.0001382826880189856,-0.000144044317374841…	0.706	0.217	0.077	1	0.485	0.34	-0.108	0.768	0.0006652378448992484,0.00025174765630592955,0.0003190331908588628,0.0002805830375000664,0.00041517347015767534,0.0003190331908588628,0.00045363554182107843,0.00043440408020368565,0.0003190331908588628,0.0004921010200715686,0.00035748674869371327,0.0004921010200715686,0.0003671006701724726,0.00035748674869371327,0.0002805830375000664,0.00039594371160766884,0.00035748674869371327,0.000444019704561…	none	0.666	37.259	620
2579857	Whole Data Set	1	5	5	25.44,25.47,25.51	26.542	921.572	25.51	1289,1287,1292,1286,1285,1285,1285,1293,1290,1285,1285,1283,1289,1282,1289,1285,1285,1291,1286,1288,1283,1286,1281,1288,1281,1288,1283,1288,1291,1282,1288,1282,1289,1281,1287,1281,1287,1283,1288,1290,1281,1292,1287,1289,1284,1286,1283,1287,1280,1288,1281,1287,1291,1287,1289,1288,1281,1289,1285,1285,1288,1286,1288,1287,1283,1288,1282,1287,1281,1286,1282,1288,1281,1287,1288,1286,1282,1285,1293,1283…	0.000018512899224472057,-0.00003993797291151022,-0.00002747164175816235,0.00009015893683005717,-0.00002210140316287236,-0.000016970977607544364,0.00003217800844898661,0.000007962306343659837,0.00008890874435270638,0.000020668785491638722,0.00011140034364947296,-0.00005465486505170847,0.00008008208617894809,0.0000778755178761751,0.00002186640104353429,-0.000041470009820574124,0.0000541367015816434…	0.013	0.0003	0.000130911650579738,0.00007734341030099493,0.000026227756190055355,-0.0000199911801949897,0.00007561539842367112,-0.000051295824260233854,-0.00002905189824417428,-0.00008748668256666677,-0.00013124704821452276,0.00005235701171521087,-0.00017231778454464077,-0.00011830428819992799,-0.00009117520790546736,-0.00004204236271195049,-0.0002446701984971598,-0.00011001017053322034,-0.0001219915081695426…	4588.48	1004	1288.33	0.781	77.109	28.33203,28.44336,28.65137	26.56152,26.56348,26.54199	98.2121	23.391	21.51	-4	-4	21.51,21.81,21.91	0.33	30.66	1469,1478,1474,1481,1483,1476,1487,1478,1485,1479,1487,1477,1484,1489,1481,1485,1484,1481,1486,1422,1420,1410,1396,1398,1386,1386,1377,1382,1376,1370,1373,1366,1370,1362,1367,1365,1356,1364,1364,1375,1405,1425,1428,1434,1442,1442,1455,1450,1451,1463,1463,1458,1468,1459,1468,1463,1461,1472,1466,1473,1467,1473,1470,1473,1467,1469,1478,1473,1472,1474,1475,1477,1479,1473,1474,1479,1474,1482,1484,1476…	94.762	0.367	0.00011222429555291451,0.00008959254240086797,0.00006864032543411354,0.00004924300376518874,0.00003128518629294896,0.000014660045262117403,-7.313192353950262e-7,-0.000014980467597863718,-0.000028172165389730124,-0.000040384887596363296,-0.000051691285457323446,-0.00006215861865523184,-0.00007184915543125953,-0.00008082054300744846,-0.00008912615051943905,-0.0000968153864996484,-0.0001039339927995…	0.00012	-0.000011954812129294872,-0.000029156879151668792,0.00001975015481539696,0.00003560349405470078,-0.00009807000397463697,-0.0000586139191570483,-0.00001128426359340083,0.00004549574874629311,0.00004718173043837737,0.00002210659337524688,-0.00004074249632905444,0.000028626695959271502,0.00009013495985470969,-0.000045128918428939155,-0.00008121512181755287,0.000011758333107249449,0.00006066978836811…	0.00004549710159314495,0.000034686893519871495,0.000024887909109069553,0.000016005555057020007,0.000007954086639640976,6.557799862269732e-7,-0.000005959818218479883,-0.000011956570846796487,-0.00001739236682056594,-0.00002231967993482106,-0.000026786075407179914,-0.00003083466904288667,-0.00003450454344799138,-0.00003783112530853207,-0.00004084652737773794,-0.00004357985847258529,-0.0000460575044…	0.00011222429555291451,0.00008959254240086797,0.00006864032543411354,0.00004924300376518874,0.00003128518629294896,0.000014660045262117403,-7.313192353950262e-7,-0.000014980467597863718,-0.000028172165389730124,-0.000040384887596363296,-0.000051691285457323446,-0.00006215861865523184,-0.00007184915543125953,-0.00008082054300744846,-0.00008912615051943905,-0.0000968153864996484,-0.0001039339927995…	0.719	0.205	0.075	0.999	0.48	1.155	-0.728	0.573	0.0002944148364193129,0.0004972716974459766,0.0002415112348632494,0.0004178816409191539,0.00017098312267007954,0.00017098312267007954,0.0003120508024692604,0.00017979851035343218,0.0004355226215623077,0.0002415112348632494,0.00034732488321501494,0.0002944148364193129,0.0002062457470726233,0.00036496299802713525,0.0002415112348632494,0.00013572336119064358,0.0001886140769769001,0.00022387813301537…	none	0.717	29.497	620
2579856	Whole Data Set	1	5	4	24.5,24.54,24.57	27.1328	921.579	24.57	1513,1512,1515,1519,1513,1511,1516,1518,1513,1510,1514,1514,1516,1509,1513,1515,1509,1520,1509,1517,1513,1509,1513,1514,1506,1508,1511,1513,1513,1505,1508,1506,1510,1505,1507,1511,1511,1509,1506,1504,1508,1503,1508,1506,1505,1509,1514,1505,1505,1507,1509,1501,1505,1504,1501,1508,1504,1501,1507,1502,1501,1505,1502,1503,1505,1506,1501,1503,1501,1503,1501,1505,1501,1501,1505,1504,1500,1501,1500,1501…	0.00005861316660920714,0.00000840593219969558,0.000055513320844015745,0.00007267890530142201,-0.000026181954164514505,0.00014444754188029432,0.00003808527563296978,0.0001376026188155487,0.0000686719916373743,0.00007460812752607028,-0.000009281095259086582,0.00019504519282727167,0.00007370118675040612,0.00013204306192443906,0.000003233395108421709,0.00006905134153258235,0.00009370242382385456,0.00…	0.0059	0.00041	0.0001548810144162203,0.00011215352232588078,-0.00012140962036983054,0.000037939791316496904,-0.00006838619559002733,-0.0001672037623088936,-0.00023981829858302537,-0.00008425634108079043,-0.00020925143056548898,-0.00019957796576046803,-0.00035071194824226127,-0.000154046619665161,-0.00024162116043583502,-0.00018706631525991453,-0.00017739271253192293,-0.0003098347333248024,-0.0002291100615283061…	5073.48	1109	1515.33	0.781	170.743	28.06934,28.64648,29.18652	27.11719,27.08301,27.13281	39.7558	16.029	16.47	-8.1	-8.1	16.47,17.73,18.83	0.48	31.3	1727,1719,1731,1729,1725,1736,1727,1735,1729,1733,1733,1739,1731,1737,1739,1732,1736,1729,1737,1658,1654,1626,1618,1612,1601,1604,1589,1590,1589,1582,1586,1584,1570,1578,1571,1574,1572,1564,1572,1595,1628,1654,1660,1674,1677,1688,1686,1688,1702,1695,1703,1700,1702,1711,1704,1713,1708,1715,1716,1710,1721,1714,1720,1717,1724,1715,1717,1726,1721,1729,1723,1728,1724,1728,1723,1730,1729,1726,1735,1731…	99.215	0.365	0.0001602341853428888,0.0000960720577650113,0.000041980912616277255,-0.000003620006398606223,-0.00004206333772916181,-0.000074472546923137,-0.0001017947587144965,-0.00012482843573833073,-0.0001442467127537403,-0.00016061706829258933,-0.00017441790861717944,-0.00018605254863540244,-0.0001958609983507756,-0.00020412989929384902,-0.00021110090131664516,-0.00021697772455305534,-0.00022193211292348896…	0.00018	-4.3996206515621707e-7,0.00003736578402723052,-0.00004052346371201848,-0.00006463691074514883,0.000020417927811050842,-0.000037916433778912246,-0.000027814377595637153,0.00006539601183092183,0.0000037967053990609243,-0.00006756923545469187,0.0000011895203701262492,0.000047143313929948096,-0.000034005817751833144,0.000060832526903077304,0.000004122585843359962,-0.000015104939178713156,0.0000015154…	0.00005305219931940966,0.00004620053298609399,0.0000396159168345868,0.00003328794233123578,0.000027206606624841746,0.000021362296734800417,0.00001574577435552727,0.000010348161253143925,0.000005160925231342345,1.7586664424290533e-7,-0.000004614894565072985,-0.000009218931320845671,-0.000013643521385423962,-0.00001789565886347916,-0.000021982065257831725,-0.00002590920009436649,-0.0000296832711328…	0.0001602341853428888,0.0000960720577650113,0.000041980912616277255,-0.000003620006398606223,-0.00004206333772916181,-0.000074472546923137,-0.0001017947587144965,-0.00012482843573833073,-0.0001442467127537403,-0.00016061706829258933,-0.00017441790861717944,-0.00018605254863540244,-0.0001958609983507756,-0.00020412989929384902,-0.00021110090131664516,-0.00021697772455305534,-0.00022193211292348896…	0.701	0.219	0.08	1	1.902	0.235	0.537	0.227	0.00045994059967298487,0.0003545676810672149,0.0005653390911266176,0.0005477708994653428,0.0004072509445397379,0.0007146974206355884,0.0004072509445397379,0.00026677644142579363,0.00039846995680417743,0.0002843332696739718,0.00045994059967298487,0.0006707631678437375,0.0003106698429067289,0.00037212805880257755,0.0003370080133440552,0.0003457877584576401,0.0005214199444134638,0.000380908513942724…	none	0.657	43.182	620
2579855	Whole Data Set	1	5	3	23.91,23.94,23.98	27.6709	921.539	23.98	1477,1481,1475,1475,1476,1473,1475,1477,1476,1477,1477,1476,1483,1474,1471,1471,1474,1473,1472,1475,1473,1475,1477,1475,1475,1475,1477,1471,1473,1475,1477,1476,1469,1468,1473,1475,1475,1469,1467,1469,1471,1469,1471,1471,1469,1465,1472,1470,1475,1469,1467,1471,1469,1469,1469,1469,1464,1473,1471,1472,1463,1466,1463,1468,1465,1464,1467,1467,1471,1471,1468,1470,1467,1464,1467,1465,1465,1465,1467,1468…	0.0000653156865334437,0.0000968946943120665,-0.000059229772625610935,0.000026420431628530644,0.00008344957583933084,0.00002276156897937006,0.0000893346630731189,0.00007955031884847208,-0.0000034037246870957346,0.00014270908443716687,0.00003429275454455122,0.000034053928503389024,0.0001897231149423655,0.000027213929624833837,-0.000004834993167061833,0.00003627982481165506,0.00015057767969817133,0.…	0.0081	0.00041	0.00019098570981509124,-1.4313523014299436e-7,0.00012686731180873944,-0.00013101083477335,-0.00008354944493319228,-0.00014102511878082697,0.000005025496640291427,-0.00020190869157513935,-0.00014809680542017905,-0.0003199946799437586,-0.00004999598883676808,-0.00015198864608323675,-0.00019991493218124955,-0.00020968908119755358,-0.0002385358379986266,-0.00031187734791113383,-0.0002326519467464043,…	4921.8	1104	1477	0.776	123.357	27.83105,28.28516,28.81348	27.83398,27.72852,27.6709	251.006	19.813	15.85	-8.13	-8.13	15.85,17.19,18.35	0.42	29.78	1683,1680,1688,1685,1684,1690,1684,1691,1688,1696,1688,1691,1690,1689,1693,1685,1695,1690,1694,1620,1611,1591,1585,1576,1567,1563,1558,1558,1548,1555,1546,1549,1547,1536,1542,1533,1541,1539,1529,1567,1598,1615,1629,1632,1647,1641,1653,1652,1659,1655,1660,1665,1662,1673,1667,1673,1676,1669,1679,1674,1677,1681,1675,1683,1677,1675,1683,1677,1686,1681,1684,1687,1676,1687,1685,1684,1688,1682,1690,1679…	94.524	0.411	0.0001470576756565816,0.00009988691894394317,0.0000581904217827582,0.0000213328855319802,-0.00001124726078644998,-0.00004004641672861954,-0.0000655033737009773,-0.00008800600049996445,-0.00010789715298155643,-0.000125479897901974,-0.00014102213052135445,-0.00015476065632539018,-0.00016690479905510295,-0.00017763959001763213,-0.00018712858727120145,-0.00019551636763809847,-0.0002029307295146222,-0…	8e-05	-0.00002883182182184146,-0.0000070464720505628765,0.000043074617315647637,-0.0000034732497752100547,-0.000013352856521144802,0.00007010421300725457,0.000005219922338070157,0.00003534068996267505,0.000003793268570403578,0.00003724745503708991,0.00004903502307003762,0.00010916462132558918,0.000005939906702415246,-0.000018939154797911407,0.00002951365446085608,0.0000029666074560496226,-0.00002857838…	0.000021171487645509216,0.0000031395552010525093,-0.000010889606167356236,-0.000021804541064495125,-0.000030296552859088506,-0.00003690348776058903,-0.00004204379960288503,-0.000046043052846631625,-0.00004915454238234697,-0.000051575336100775344,-0.000053458756295481227,-0.000054924090414130906,-0.00005606414619420294,-0.000056951129691777795,-0.00005764121849157354,-0.00005817811974498536,-0.000…	0.0001470576756565816,0.00009988691894394317,0.0000581904217827582,0.0000213328855319802,-0.00001124726078644998,-0.00004004641672861954,-0.0000655033737009773,-0.00008800600049996445,-0.00010789715298155643,-0.000125479897901974,-0.00014102213052135445,-0.00015476065632539018,-0.00016690479905510295,-0.00017763959001763213,-0.00018712858727120145,-0.00019551636763809847,-0.0002029307295146222,-0…	0.7	0.213	0.087	1	0.616	0.841	-0.411	0.57	0.0005732490094749788,0.0003540836159159281,0.0003175668008011804,0.0002080347745199621,0.0003175668008011804,0.0003175668008011804,0.0003175668008011804,0.0003358248245527678,0.0003175668008011804,0.0006280576436561813,0.00042712645877459975,0.00040886459631986566,0.0002445423806193286,0.0002445423806193286,0.00029930954459656006,0.0004636524875516214,0.0003358248245527678,0.0004362576779732882,…	none	0.674	39.563	620
2579854	Whole Data Set	1	5	2	23.32,23.36,23.39	27.1807	921.506	23.39	1492,1491,1492,1492,1489,1491,1492,1488,1489,1487,1488,1490,1489,1487,1487,1487,1490,1487,1489,1487,1488,1488,1486,1487,1485,1487,1488,1486,1490,1486,1485,1486,1485,1483,1484,1484,1483,1488,1484,1487,1483,1481,1482,1481,1483,1481,1483,1479,1484,1484,1483,1481,1480,1481,1481,1480,1484,1489,1487,1488,1485,1488,1485,1489,1486,1486,1487,1485,1483,1485,1485,1485,1484,1485,1486,1485,1485,1482,1485,1488…	0.0001353395822841058,-0.000017752790262245242,-0.000015196623865656143,0.00008074196569748279,0.00010664684926744326,0.0000780715864566276,0.00011175907674762316,0.00002092770964347097,0.00007795736263137482,-0.00008288681327229282,0.00012198335117832823,0.0000934079981035112,0.00011152942714750324,-0.00004932359200038851,0.000007695235863158174,0.000014141671050505127,0.000047822596435025694,0.…	0.0076	0.00035	0.00013975992899946884,0.00008783832807766682,-0.00007688678485925308,0.00008516810455689795,-0.0000406579346756877,-0.00021699536912889294,-0.000047215506770402295,-0.00010300100309815041,-0.00013933506530237295,-0.00021454853417171154,-0.0001653329226576817,-0.00019777256219116415,-0.00018744034193805711,-0.00008766657699024909,-0.0002950746546877073,-0.00012922260904629692,-0.00021998668696779…	5063.14	1109	1491.67	0.781	132.213	27.55469,27.88574,28.2666	27.12891,27.13086,27.18066	1118.55	18.712	21.85	-1.54	-1.54	21.85,22.23,22.43	0.53	29.48	1692,1699,1698,1704,1699,1708,1705,1711,1703,1709,1704,1715,1705,1713,1705,1713,1705,1713,1711,1654,1630,1623,1604,1604,1595,1587,1584,1576,1579,1567,1576,1564,1571,1562,1570,1559,1564,1558,1564,1583,1619,1629,1648,1653,1657,1668,1665,1669,1675,1680,1680,1677,1687,1681,1689,1689,1684,1693,1686,1687,1698,1696,1691,1701,1692,1692,1699,1695,1701,1694,1704,1699,1703,1705,1695,1707,1698,1704,1700,1708…	92.93	0.369	0.0001336760196816748,0.00008999668999043464,0.00005172686070179671,0.000018196588050309212,-0.000011181102025169671,-0.00003692048932873819,-0.00005947216228399538,-0.00007923090584236944,-0.00009654261250733231,-0.00011171033745746979,-0.0001249996037681474,-0.00013664305060389118,-0.00014684450575178489,-0.0001557825537888152,-0.0001636136623467699,-0.00017047492120243917,-0.000176486442143070…	0.00011	0.000010844494583428621,0.000019183459678894086,0.00008773175317460666,-0.00000807013447317077,0.000040946834641457846,-0.00000766337007421933,-0.000002578876216956514,0.00003504818555447867,0.00008244254324567599,-0.000010103886475768103,-0.0000066464607437297284,-0.00006338533035370812,-0.000027390548236699873,0.000037895664991580975,0.00007389876154875593,0.00005294740886394857,-0.000046099971…	0.00009305371199481374,0.00002073369785080973,-0.000002897193864957551,-0.000010618694612598331,-0.000013141729905254498,-0.000013966143098497219,-0.000014235523838105163,-0.000014323545213146836,-0.000014352306595551174,-0.00001436170450733586,-0.000014364775317517065,-0.000014365778718632658,-0.000014366106584485432,-0.000014366213716135722,-0.000014366248721886997,-0.000014366260160174553,-0.0…	0.0001336760196816748,0.00008999668999043464,0.00005172686070179671,0.000018196588050309212,-0.000011181102025169671,-0.00003692048932873819,-0.00005947216228399538,-0.00007923090584236944,-0.00009654261250733231,-0.00011171033745746979,-0.0001249996037681474,-0.00013664305060389118,-0.00014684450575178489,-0.0001557825537888152,-0.0001636136623467699,-0.00017047492120243917,-0.000176486442143070…	0.705	0.215	0.079	0.999	0.805	0.553	0.103	0.344	0.00044394776180172076,0.00040897478047309,0.0003565205885012255,0.00028659151953069526,0.0002691110114922652,0.0002691110114922652,0.0003565205885012255,0.00031281360090303615,0.00014676715196636222,0.00023415210606375042,0.0002691110114922652,0.00023415210606375042,0.00028659151953069526,0.00022541281938374562,0.00015550485619079675,0.0003040727311942054,0.0003390372656228515,0.0002516312070221…	none	0.672	43.832	620
2579853	Whole Data Set	1	5	1	22.75,22.77,22.79	25.6895	921.431	22.79	1500,1501,1501,1513,1512,1502,1505,1510,1506,1500,1500,1501,1505,1504,1500,1504,1511,1506,1506,1508,1501,1501,1508,1508,1506,1501,1498,1497,1504,1505,1501,1501,1502,1503,1500,1498,1496,1506,1500,1501,1500,1502,1500,1498,1495,1500,1501,1496,1497,1495,1500,1500,1502,1494,1495,1498,1499,1494,1494,1498,1499,1498,1496,1501,1500,1501,1499,1495,1493,1502,1494,1499,1494,1494,1505,1498,1497,1496,1494,1492…	0.000021493905642944975,0.00010339652686061792,-0.000018972538546182215,0.000012641390314999596,0.00007882633929154651,-0.00003096513414219555,0.00003207008306999116,0.00009825631966864415,0.0001330197339899107,0.000057783718864633915,-0.000014296159976583516,-0.00008636297138650816,0.00017464325981745183,0.00012140156440185777,-0.000019812800934085896,0.00017835766836114792,0.0001125455950819818…	0.0108	0.00032	0.00006302955745467753,0.00011349977356234262,-0.000011995133183225205,-0.0000777733746686194,-0.00012155526554511405,-0.00005854169242656103,-0.00013059252775989697,-0.00013039994221174126,-0.000029693679307370133,-0.00008290222934836684,-0.00016122750351429266,-0.00020185790321980865,-0.0002613221548187673,-0.00016064910863859146,-0.00019813858956903722,-0.00021992518490772972,-0.00012866680145…	5147.05	1141	1505	0.778	92.33	25.37402,25.93848,26.44043	25.44824,25.54492,25.68945	964.839	20.79	18.49	-4.3	-4.3	18.49,19.79,20.65	0.27	25.59	1694,1706,1702,1712,1700,1714,1704,1714,1706,1714,1709,1716,1708,1716,1711,1717,1709,1717,1710,1654,1635,1628,1616,1612,1601,1602,1592,1594,1584,1586,1588,1586,1581,1579,1584,1578,1582,1574,1581,1597,1630,1650,1651,1668,1665,1678,1674,1684,1685,1686,1692,1685,1694,1688,1697,1686,1700,1693,1699,1694,1701,1698,1706,1699,1703,1698,1710,1699,1709,1701,1705,1702,1705,1702,1708,1704,1711,1707,1710,1706…	80.323	0.39	0.00007963442412790356,0.00005132485299490637,0.000025512071499644363,0.0000019758728976982222,-0.000019484528211416262,-0.00003905220876820764,-0.0000568940990677329,-0.00007316240682839952,-0.00008799591566366051,-0.00010152116903375962,-0.00011385354977772264,-0.0001250982644349945,-0.00013535124075389075,-0.0001446999460434345,-0.00015322413334987236,-0.0001609965218234405,-0.0001680834170795…	5e-05	0.0000022071605529048182,-0.000009401363381787587,-0.000024379090374002052,-0.00004272566752554268,-0.000020638900357973498,-0.000010344840488915583,0.0000117435408903189,1.3478770652749974e-7,-0.00005696088572088355,-0.00005172165020989115,0.000017539579304835553,0.00002446461222587251,-0.000027579995552114764,-0.00001223177889139437,0.00007051632193178066,-0.000028708730105112134,-0.00001673013…	0.000012311854948225325,-0.00002015760082865879,-0.000032529910032787326,-0.000037244311040750676,-0.000039040707856994915,-0.00003972521507561325,-0.00003998604282152309,-0.00004008542981290315,-0.00004012330068442843,-0.00004013773117367224,-0.000040143229832969705,-0.00004014532506713389,-0.00004014612344469564,-0.00004014642766211534,-0.000040146543582505497,-0.000040146587753338544,-0.000040…	0.00007963442412790356,0.00005132485299490637,0.000025512071499644363,0.0000019758728976982222,-0.000019484528211416262,-0.00003905220876820764,-0.0000568940990677329,-0.00007316240682839952,-0.00008799591566366051,-0.00010152116903375962,-0.00011385354977772264,-0.0001250982644349945,-0.00013535124075389075,-0.0001446999460434345,-0.00015322413334987236,-0.0001609965218234405,-0.0001680834170795…	0.708	0.21	0.082	1	0.906	0.489	0.183	0.328	0.0002368249984498172,0.0002275715977462761,0.0002275715977462761,0.00033862542086341465,0.000542297880989712,0.0002275715977462761,0.0002275715977462761,0.00033862542086341465,0.000403419934306065,0.0003016043244380055,0.00020906538779775572,0.00035713715258127573,0.0004311919710578775,0.00019055996640437287,0.00020906538779775572,0.00015355148901486978,0.0002738405729883493,0.000394162983364060…	none	0.689	39.561	620
[truncated: 10 more columns]
